# Supplementary material
Source: PubMed Central journal article supplement (PMC7266684)
Supplement: nqaa076_supplemental_file.pdf [file nqaa076_supplemental_file.pdf]

**Lauren Brink et al. Neonatal diet alters fecal microbiota and metabolome profiles over the first year of life in infants fed breast milk or formula.**

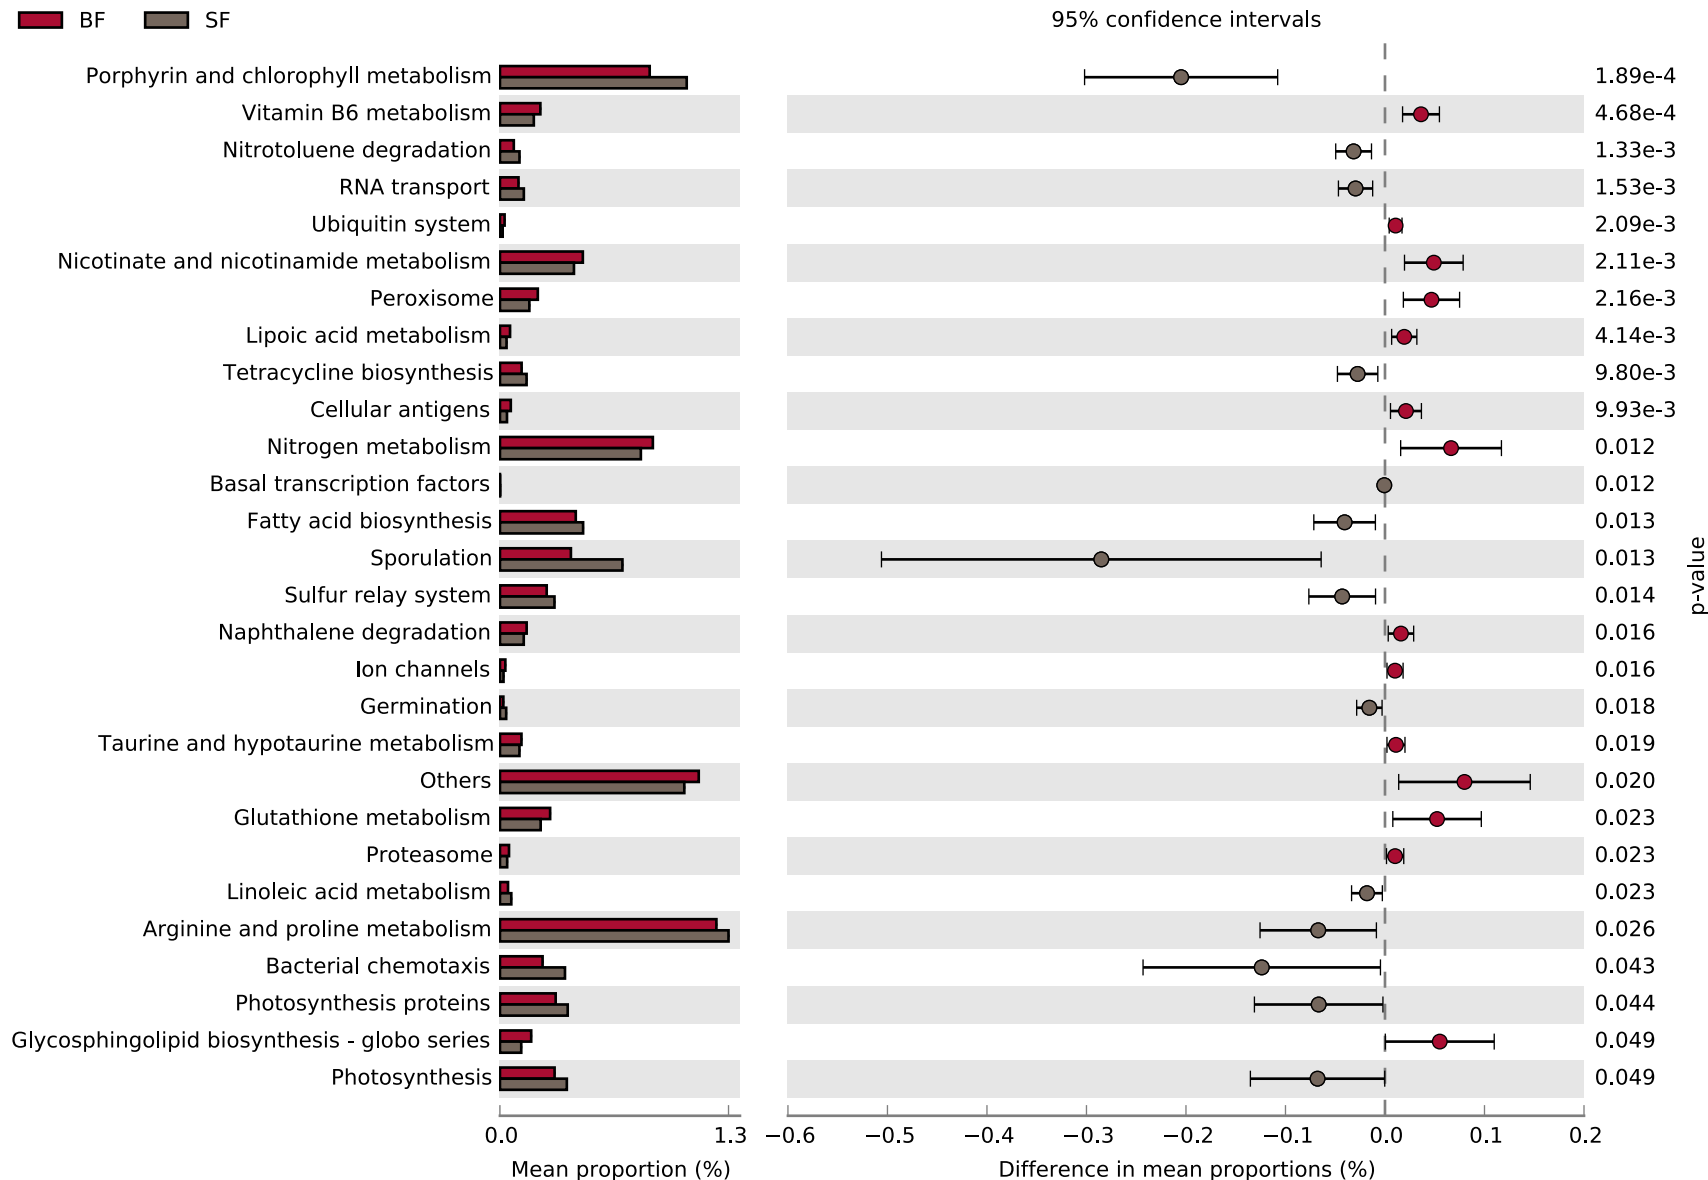

**Supplemental Figure 1:** The figures shows the significant metabolic pathways of the corresponding OTUs generated by QIIME for microbial communities between BF and SF at 3 months of age.

**Lauren Brink et al. Neonatal diet alters fecal microbiota and metabolome profiles over the first year of life in infants fed breast milk or formula.**

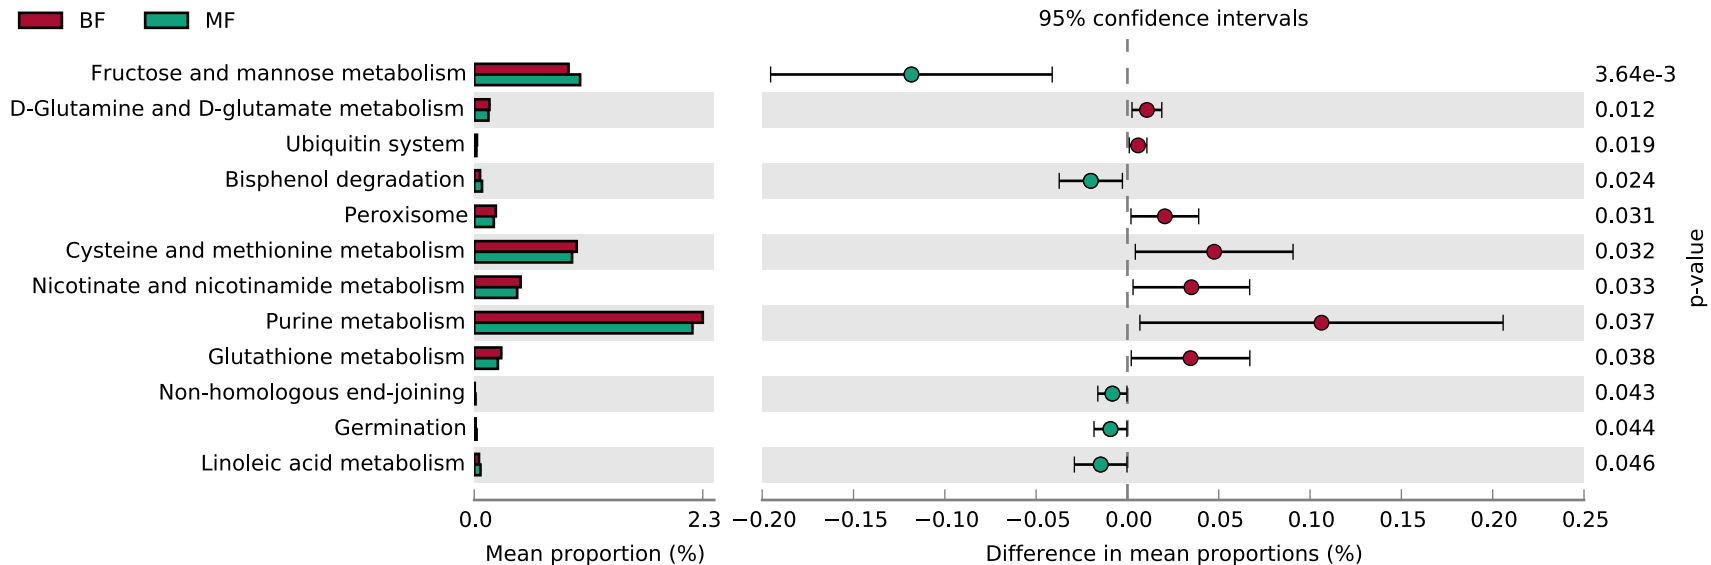

**Supplemental Figure 2:** The figures shows the significant metabolic pathways of the corresponding OTUs generated by QIIME for microbial communities between BF and MF at 6 months of age.

**Lauren Brink et al. Neonatal diet alters fecal microbiota and metabolome profiles over the first year of life in infants fed breast milk or formula.**

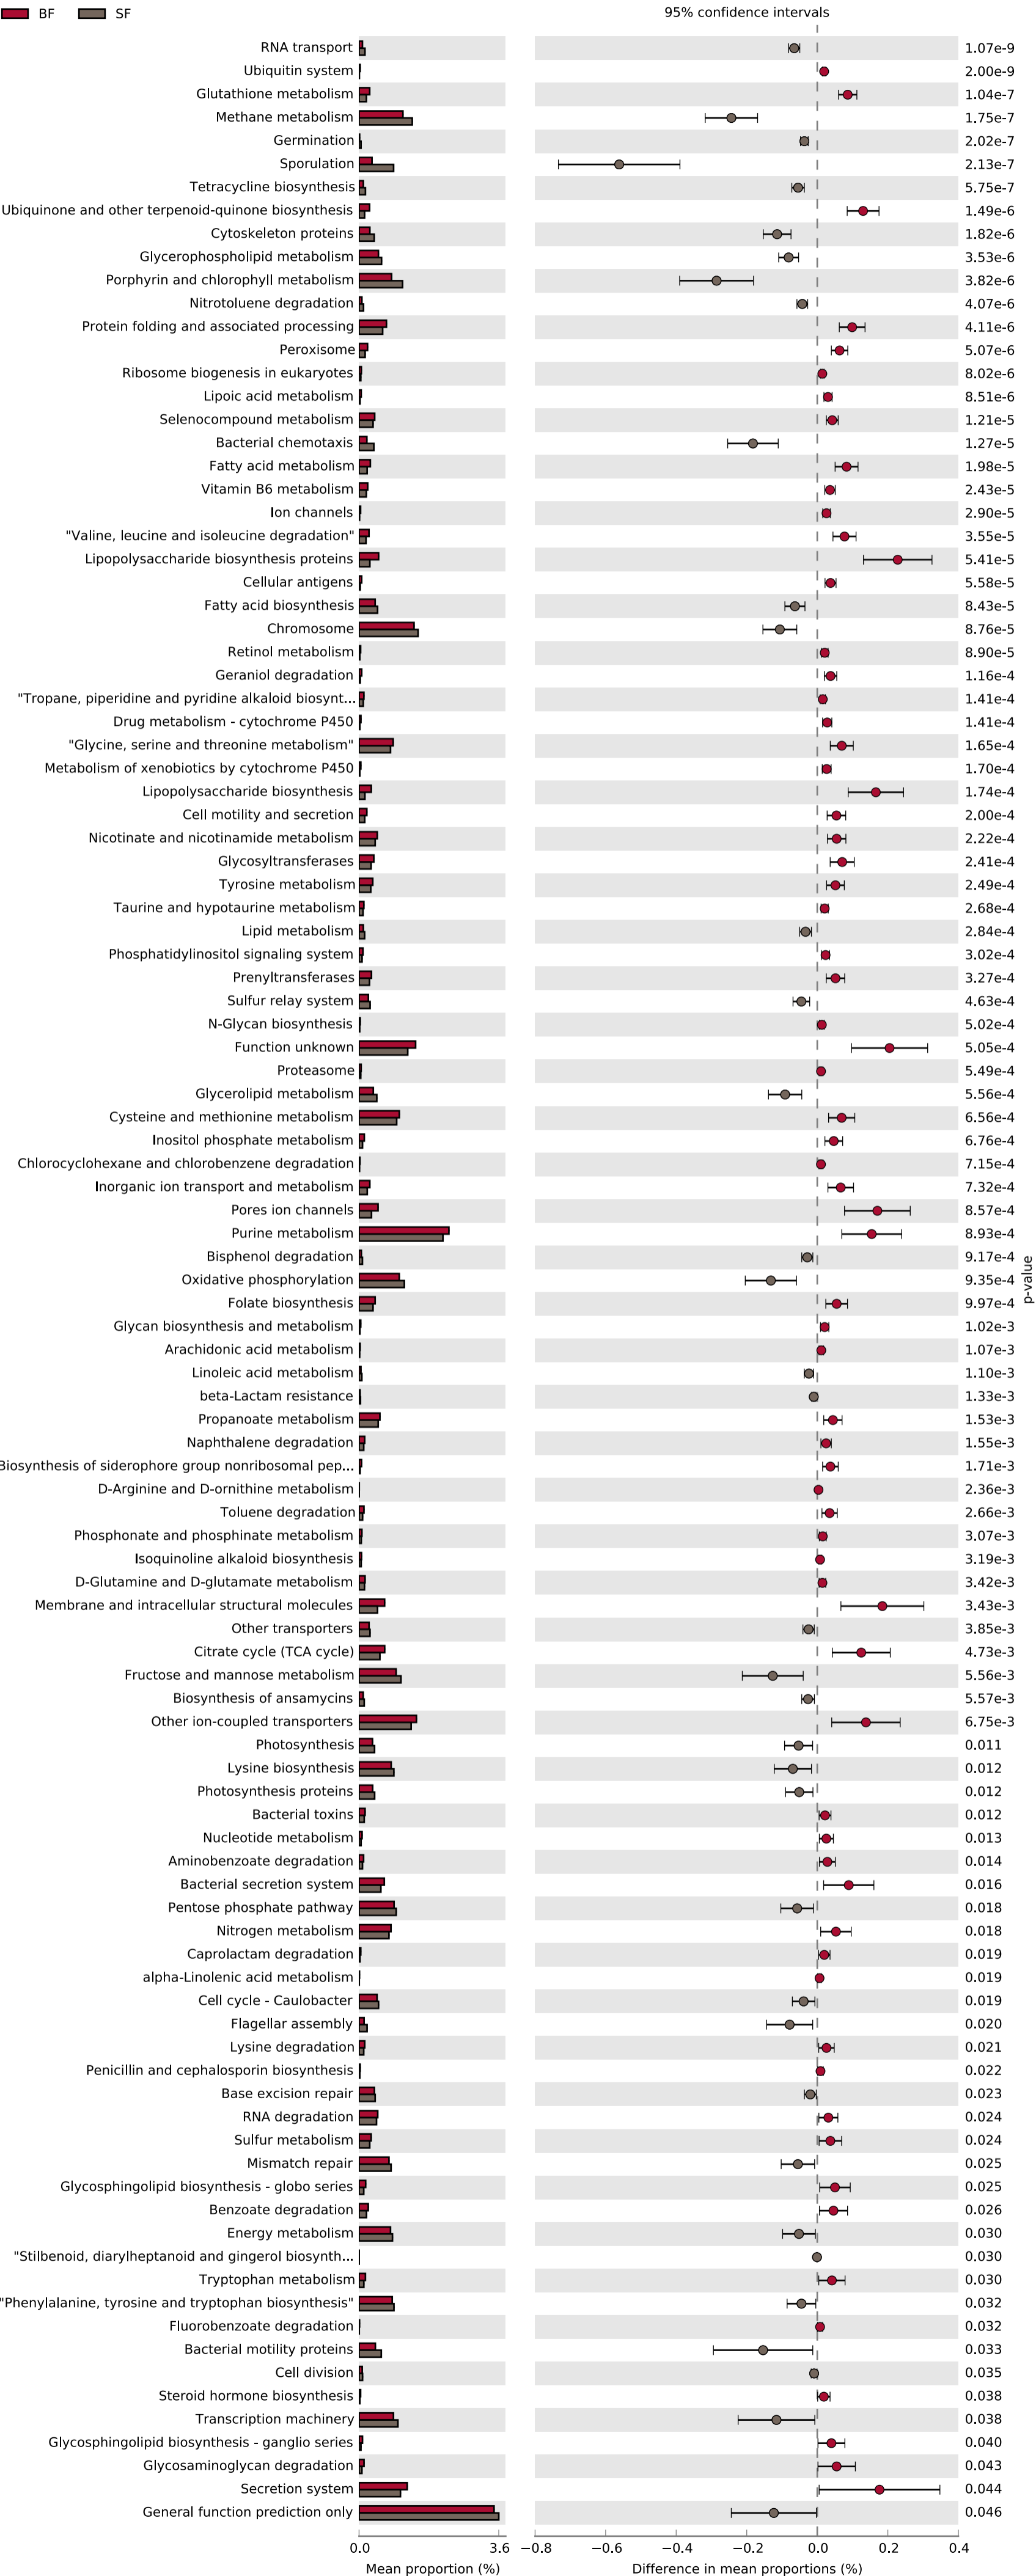

**Supplemental Figure 3:** The figures shows the significant metabolic pathways of the corresponding OTUs generated by QIIME for microbial communities between BF and SF at 6 months of age.

**Lauren Brink et al. Neonatal diet alters fecal microbiota and metabolome profiles over the first year of life in infants fed breast milk or formula.**

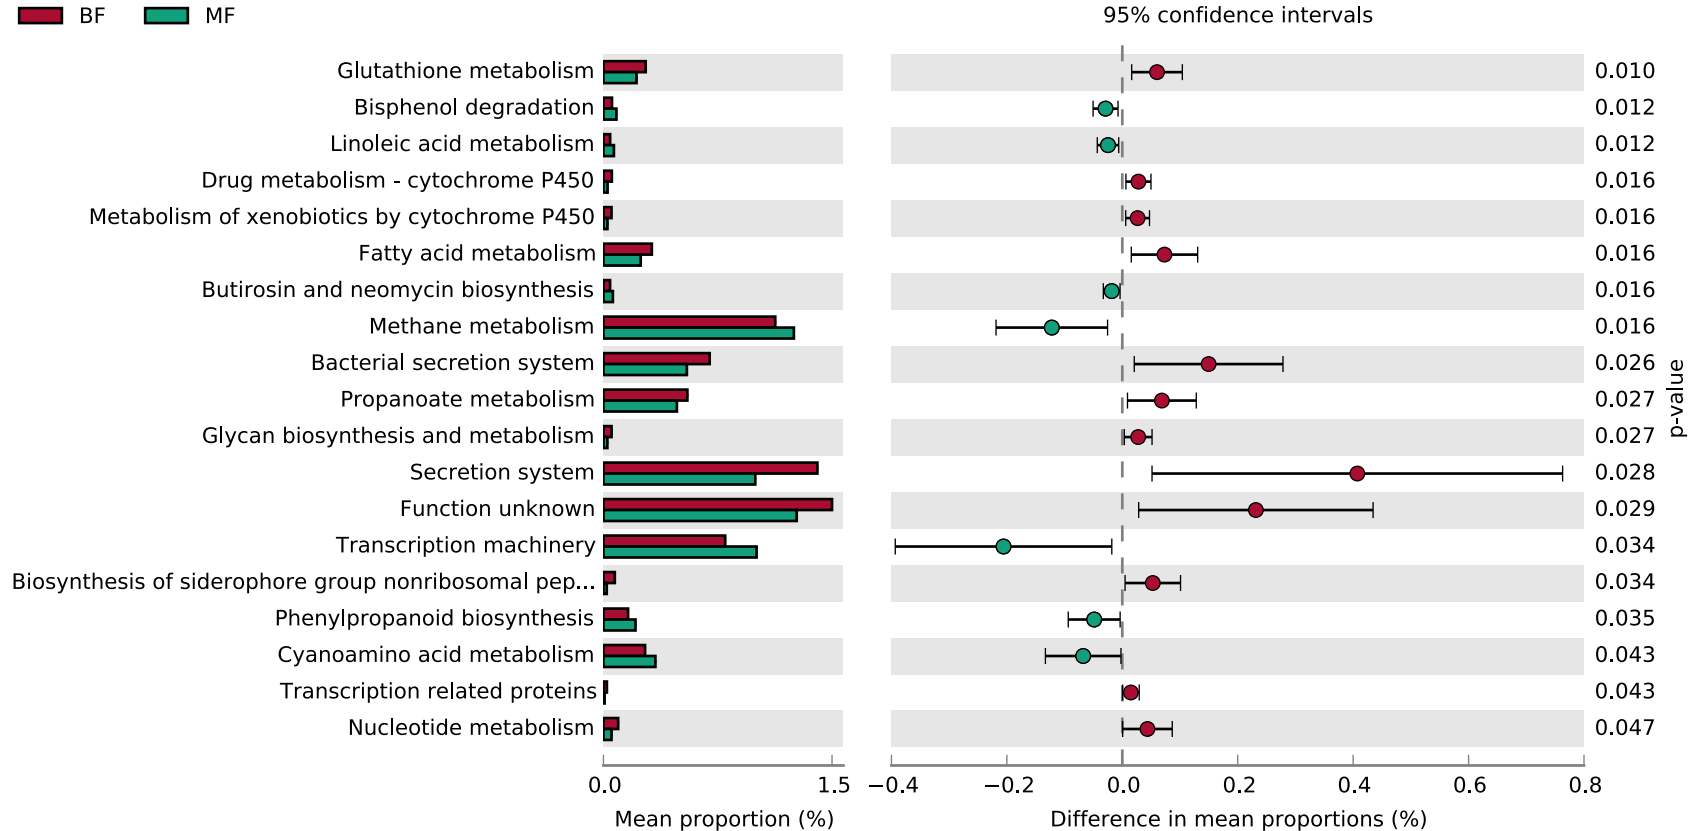

**Supplemental Figure 4:** The figures shows the significant metabolic pathways of the corresponding OTUs generated by QIIME for microbial communities between BF and MF at 9 months of age.

**Lauren Brink et al. Neonatal diet alters fecal microbiota and metabolome profiles over the first year of life in infants fed breast milk or formula.**

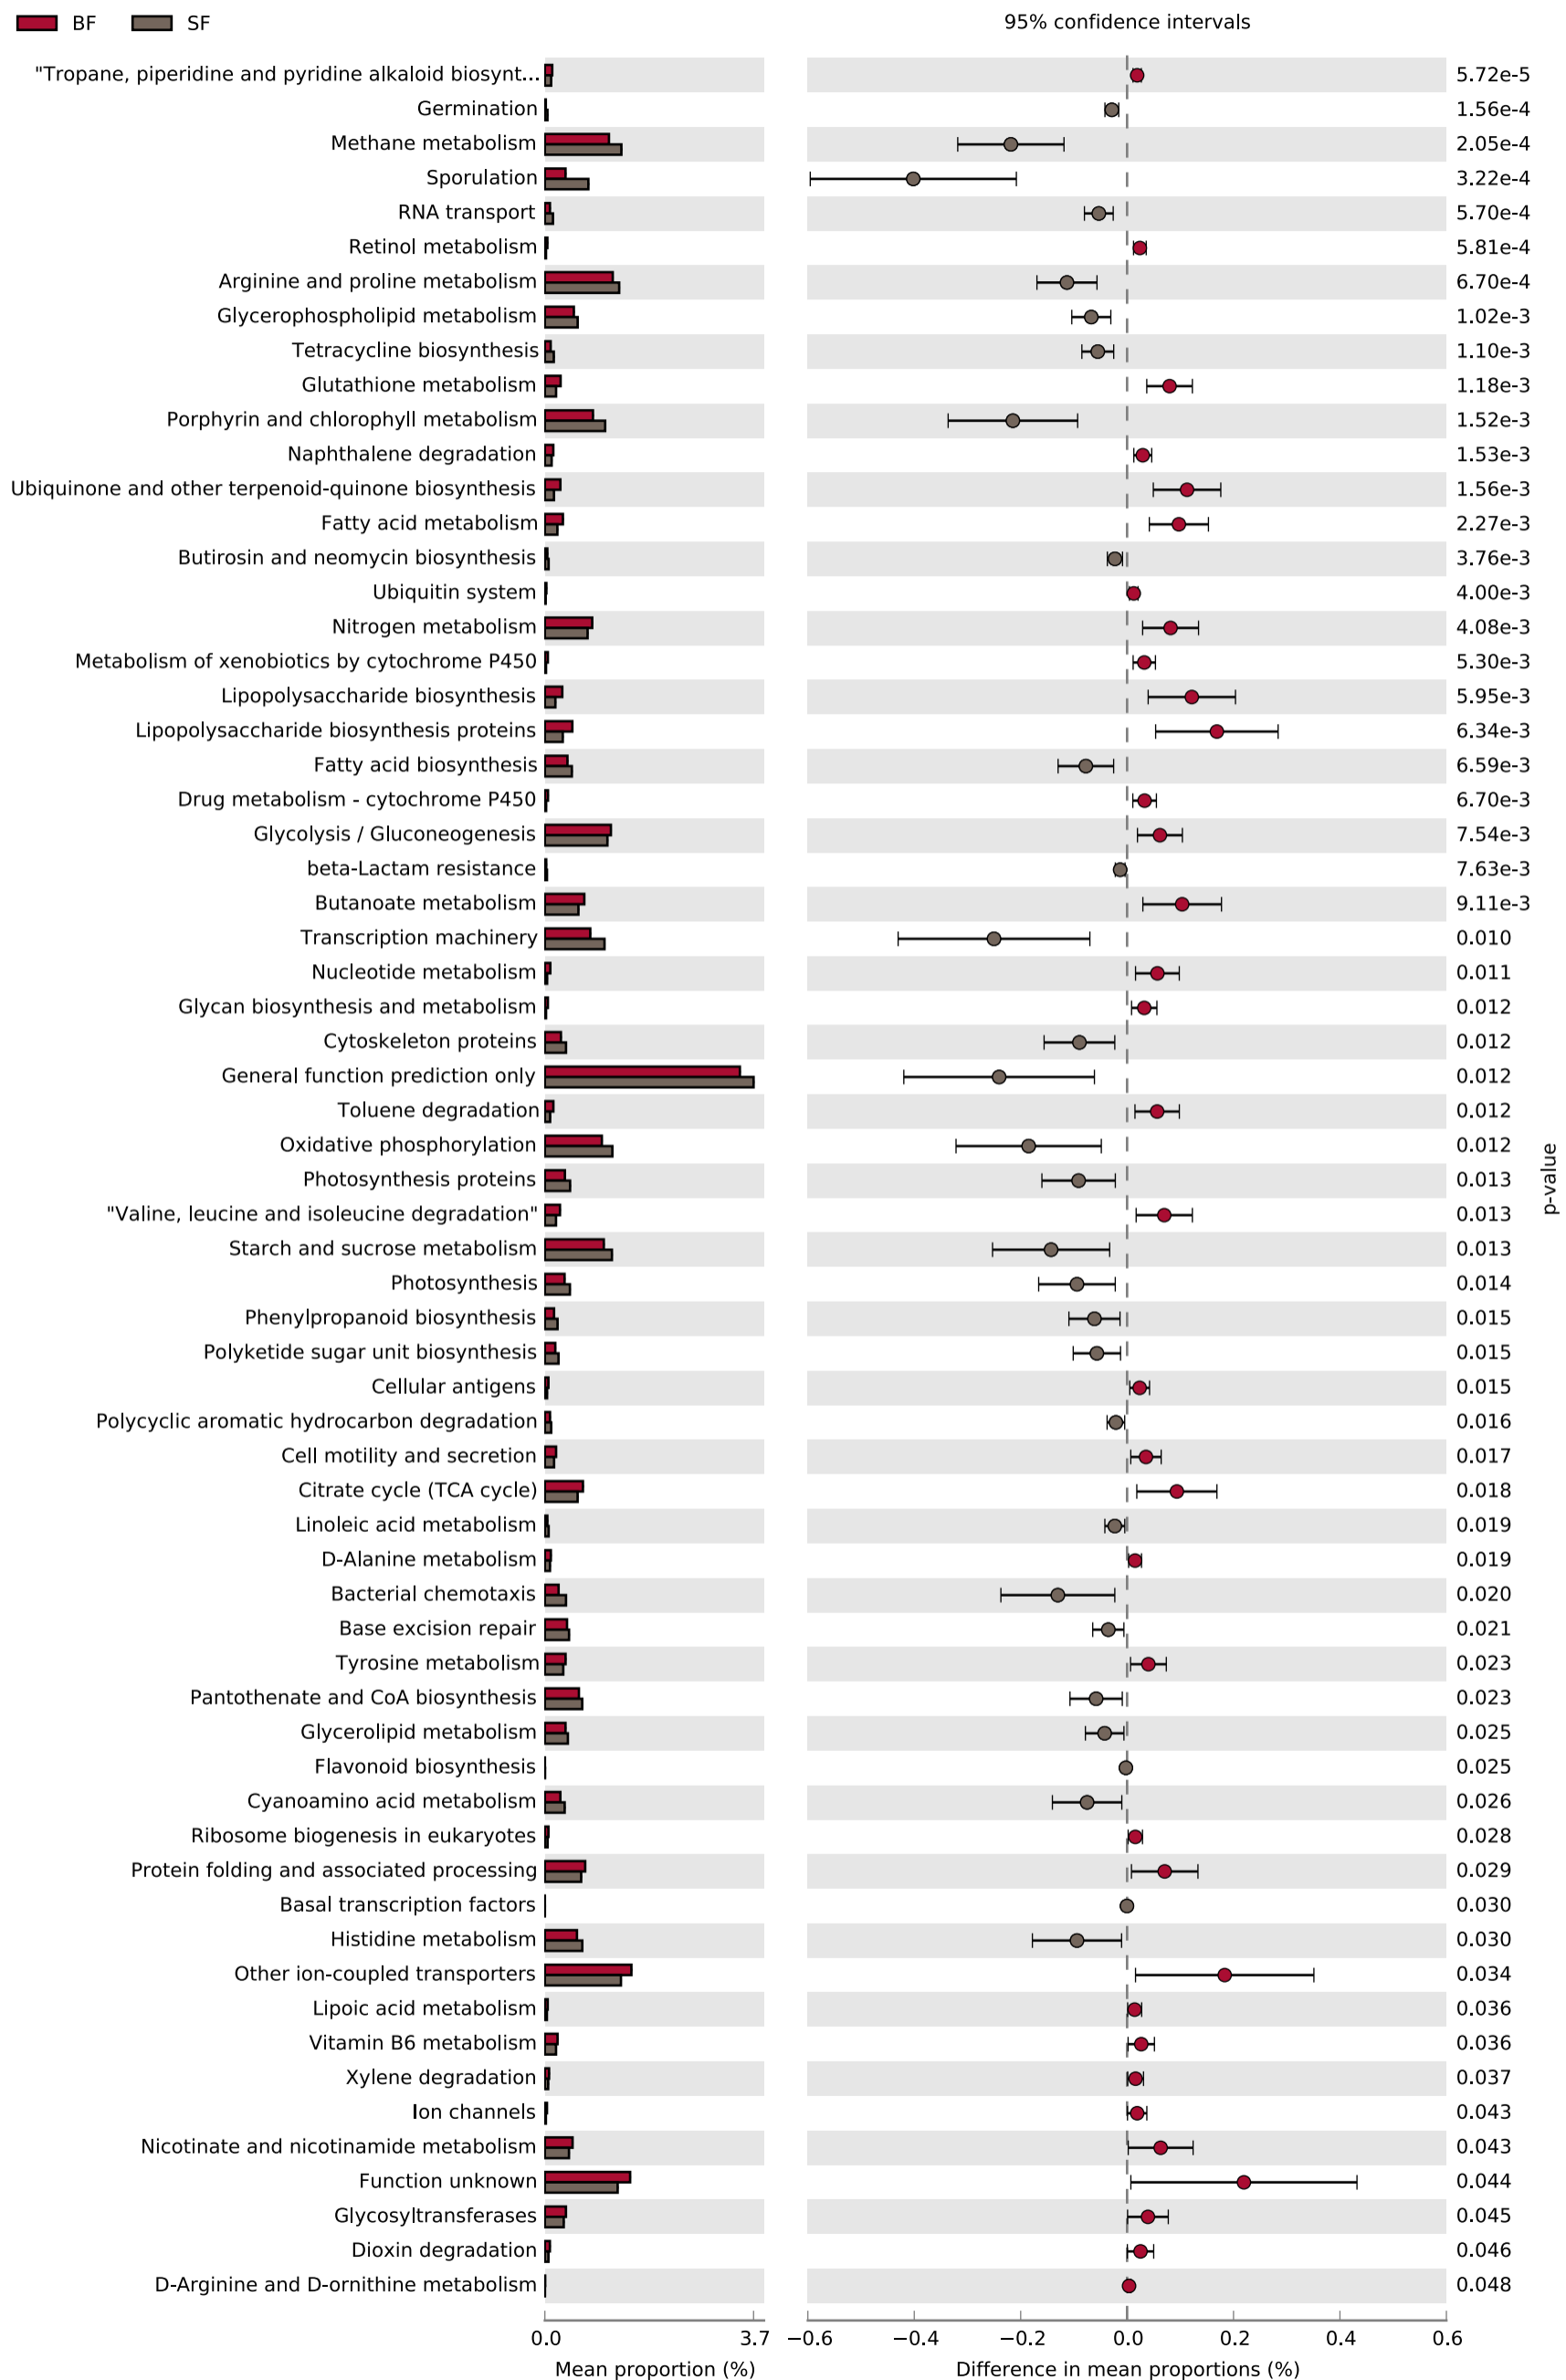

**Supplemental Figure 5:** The figures shows the significant metabolic pathways of the corresponding OTUs generated by QIIME for microbial communities between BF and SF at 9 months of age.

**Lauren Brink et al. Neonatal diet alters fecal microbiota and metabolome profiles over the first year of life in infants fed breast milk or formula.**

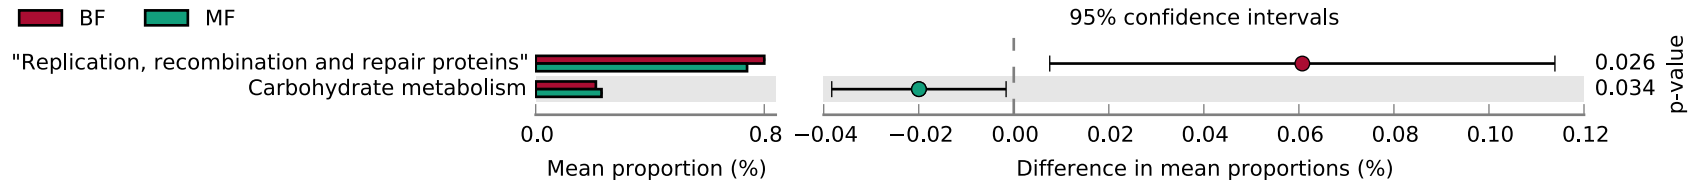

**Supplemental Figure 6:** The figure shows the significant metabolic pathways of the corresponding OTUs generated by QIIME for microbial communities between BF and MF at 12 months of age.

**Lauren Brink et al. Neonatal diet alters fecal microbiota and metabolome profiles over the first year of life in infants fed breast milk or formula.**

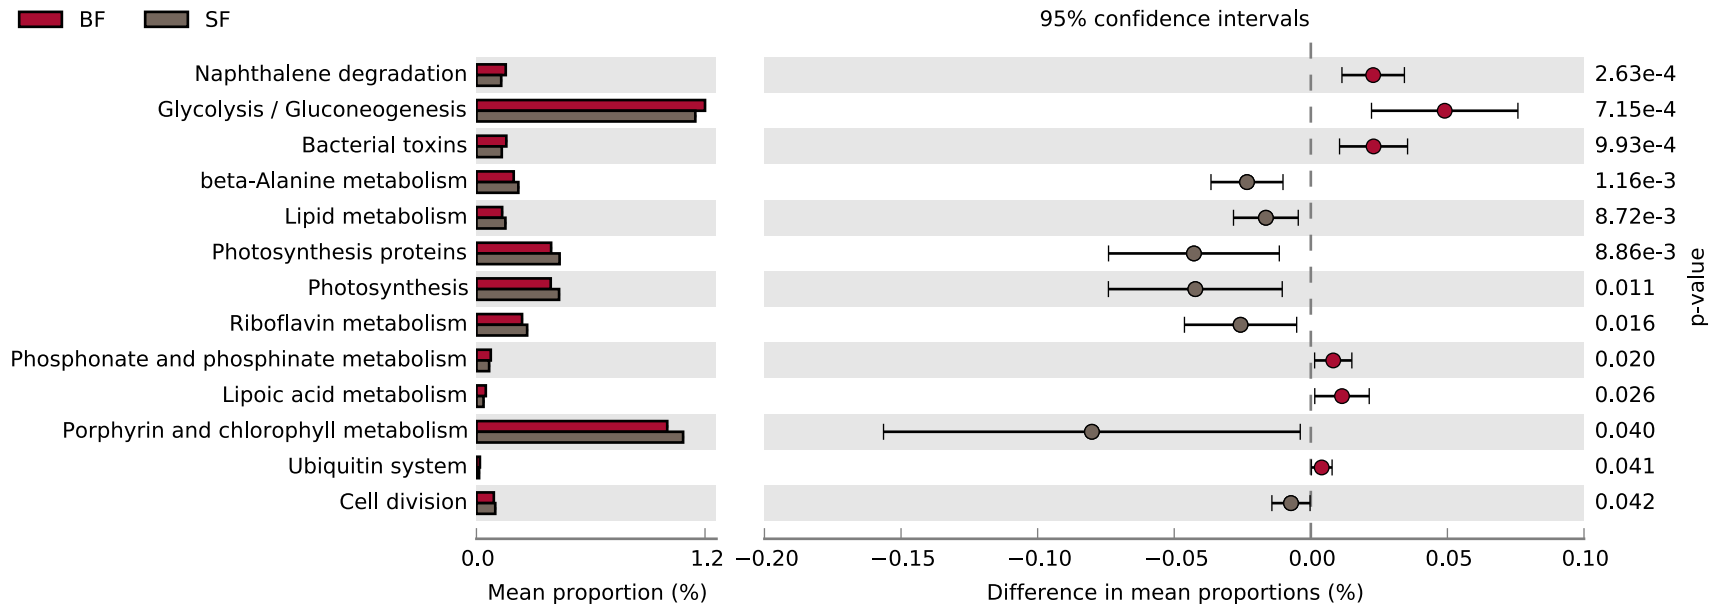

**Supplemental Figure 7:** The figures shows the significant metabolic pathways of the corresponding OTUs generated by QIIME for microbial communities between BF and SF at 12 months of age.

**Lauren Brink et al. Neonatal diet alters fecal microbiota and metabolome profiles over the first year of life in infants fed breast milk or formula.**

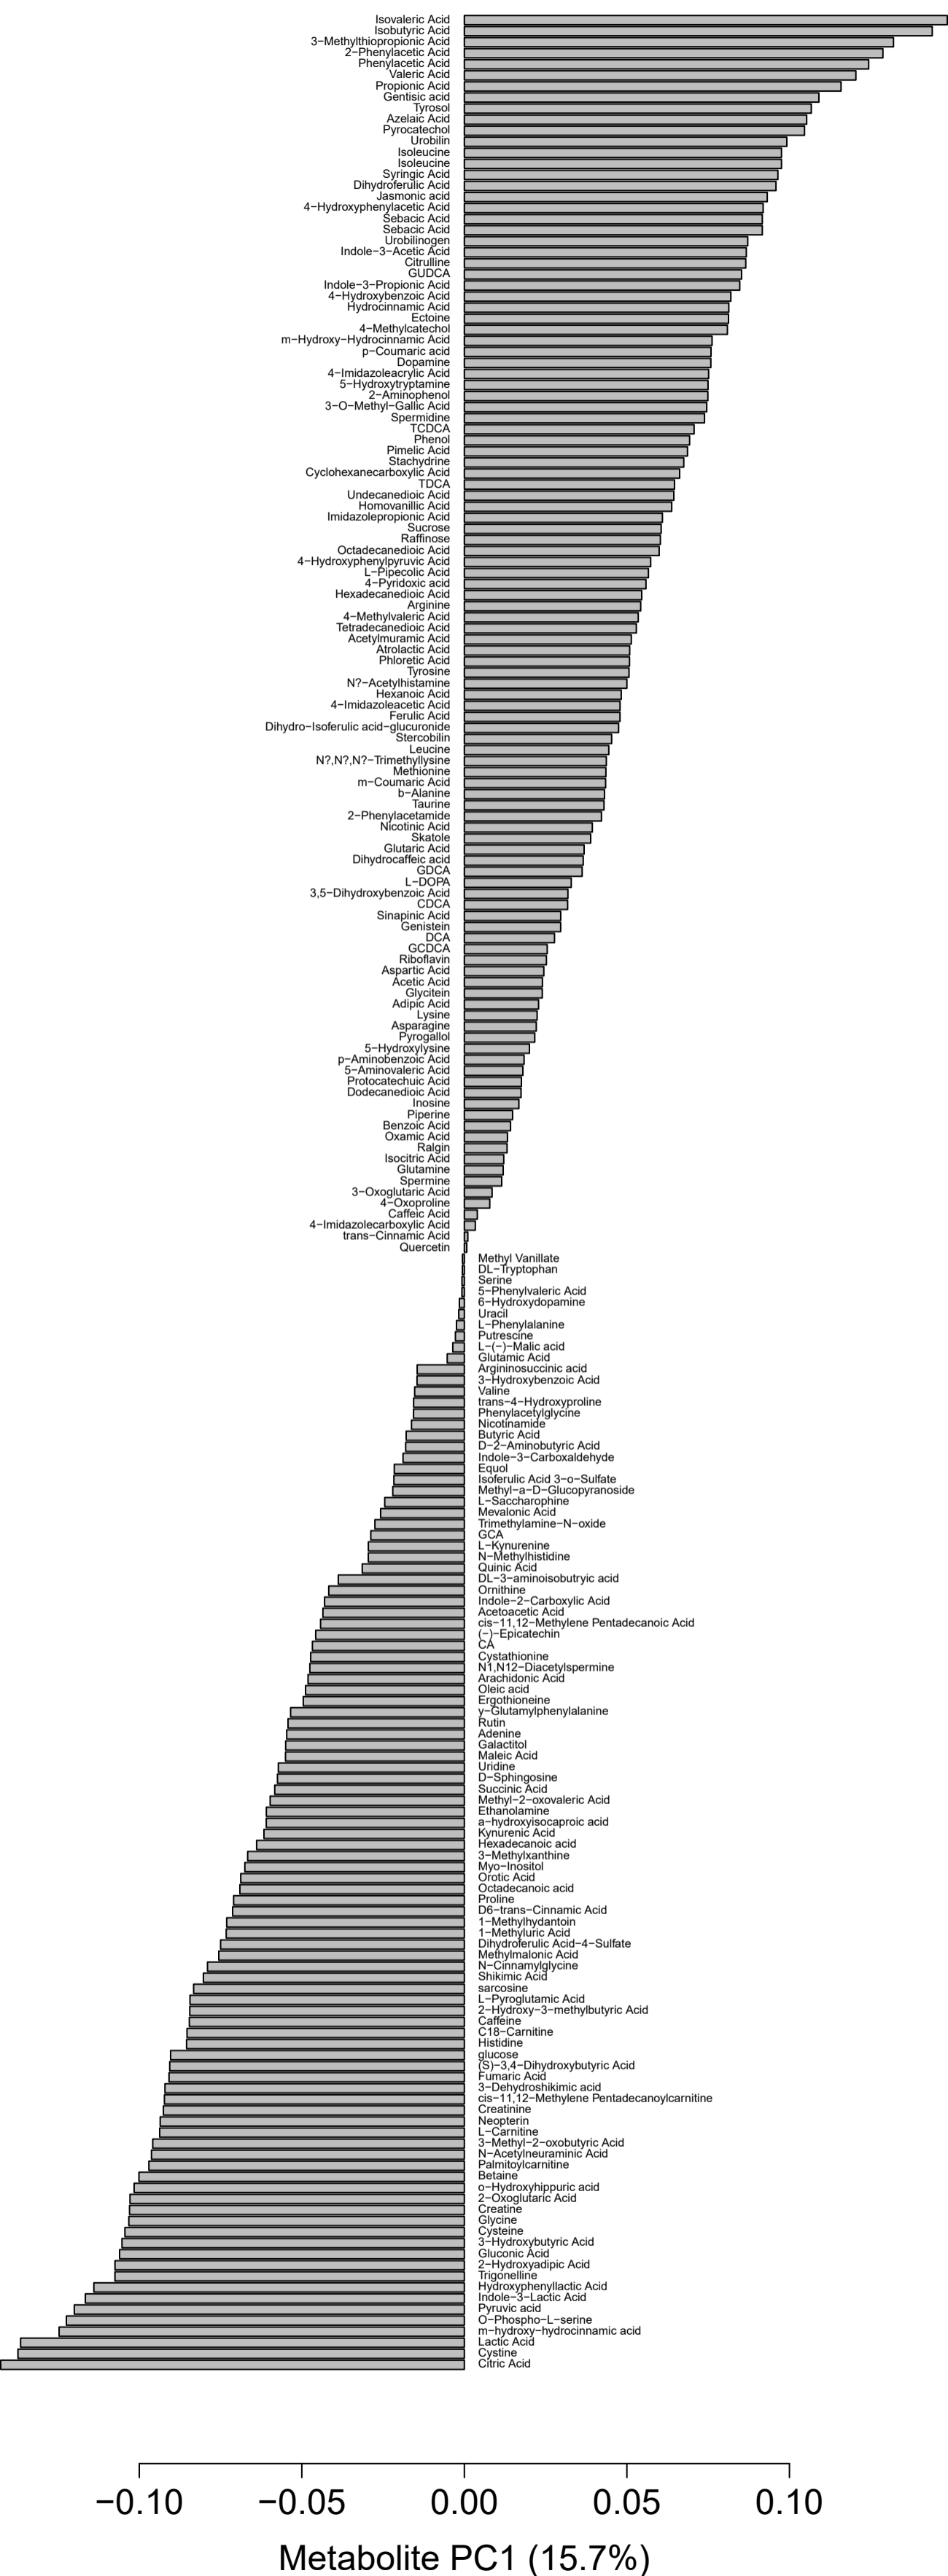

**Supplemental Figure 8:** PCA loading values associated with each metabolite along principal component 1. All metabolite were scaled to unit variance prior to PCA analysis. Largest absolute loading values (i.e., positive and negative values) contribute the greatest variance to principal component 1



**Lauren Brink et al. Neonatal diet alters fecal microbiota and metabolome profiles over the first year of life in infants fed breast milk or formula.**

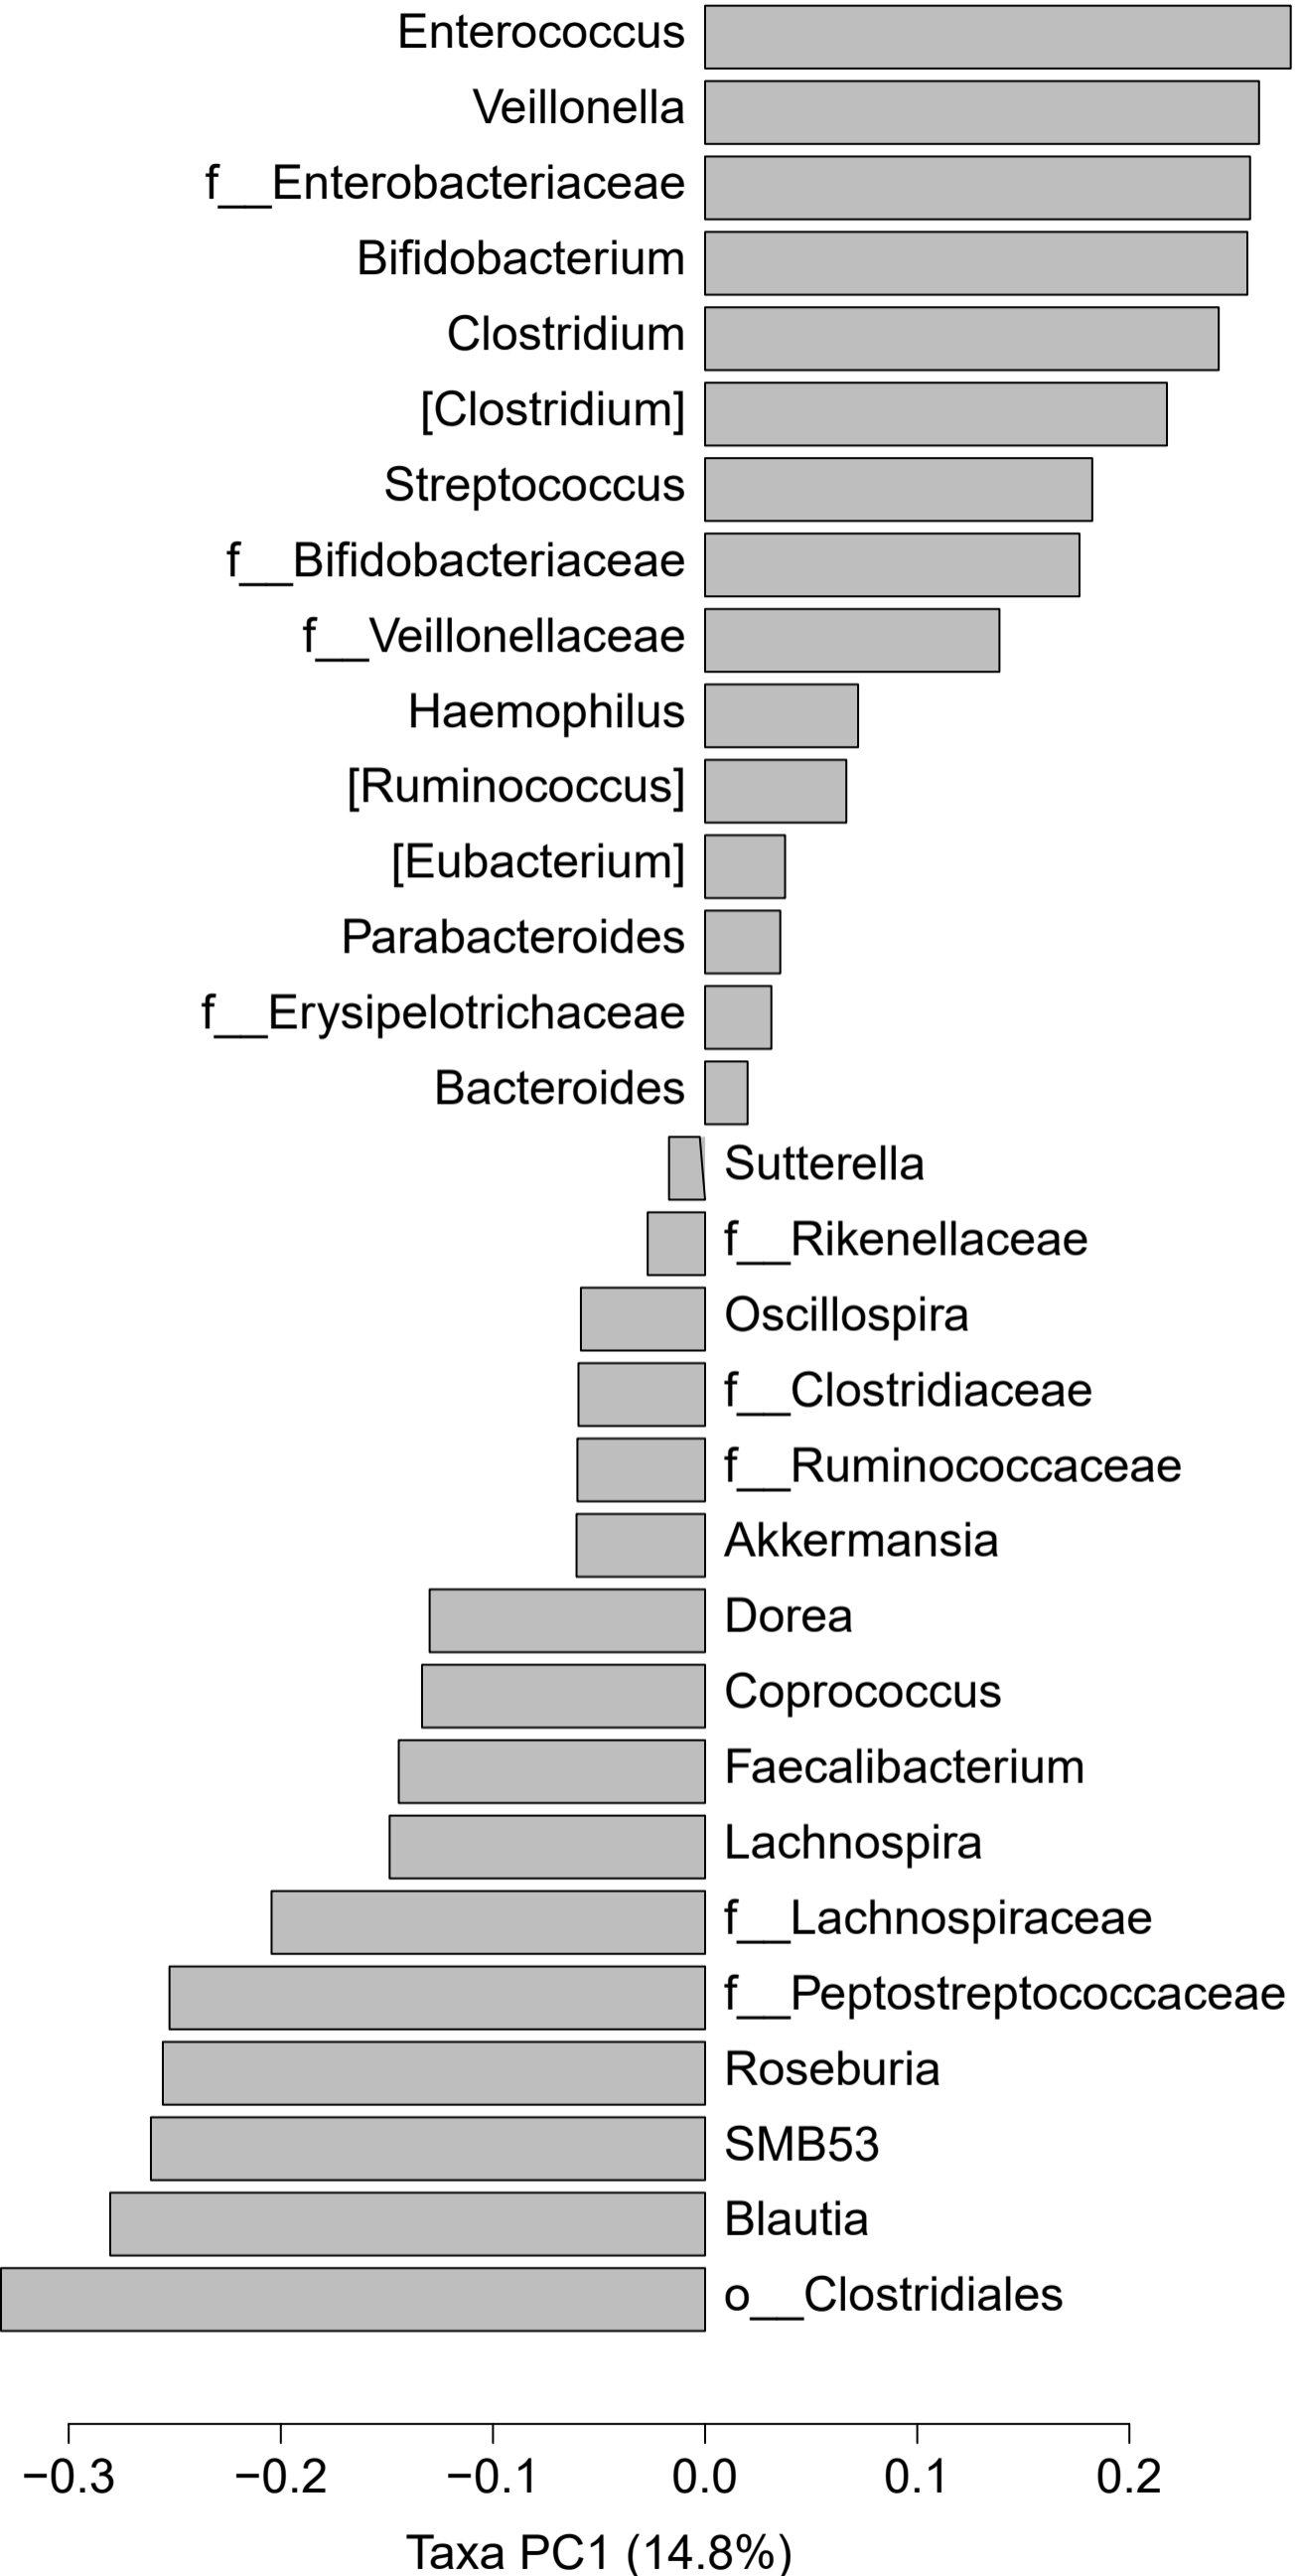

**Supplemental Figure 9:** PCA loading values associated with each genera along principal component 1. All genera were included in PCA. Data were centered-log transformed prior to PCA analysis. Zero counts were imputed using geometric Bayesian multiplicative imputation prior to transformation. Largest absolute loading values (i.e., positive and negative values) contribute the greatest variance to principal component 1.



**Lauren Brink et al. Neonatal diet alters fecal microbiota and metabolome profiles over the first year of life in infants fed breast milk or formula.**

**Supplementary Table 1.** List of metabolite standards used for identification with mass spectrometry<sup>1</sup>.

| Metabolite                             | Alternate name                                  | Formula    | MW      | M-H     | M+H     | RT     |
|----------------------------------------|-------------------------------------------------|------------|---------|---------|---------|--------|
| (-)-Epicatechin                        | (-)-Catechuic acid                              | C15H14O6   | 290.080 | 289.072 | 291.086 | 6.563  |
| (+/-)-Catechin                         | (+)-Catechol                                    | C15H14O6   | 290.078 | 289.072 | 291.086 | 6.002  |
| (±)-Jasmonic acid                      |                                                 | C12H18O3   | 210.125 | 209.118 | 211.133 | 9.368  |
| (S)-(+)-2-Methylbutyric Acid           | (S)-2-Methylbutanoic Acid                       | C5H10O2    | 102.068 | 101.061 | 103.075 | 7.216  |
| (S)-3,4-Dihydroxybutyric Acid          | 2-Deoxytetronic Acid                            | C4H8O4     | 120.042 | 119.035 | 121.050 | 0.758  |
| 11-Bromoundecanoic Acid                |                                                 | C11H21BrO2 | 264.073 | 263.065 | 265.080 | 11.310 |
| 1-Methylhydantoin                      | 1-Methylimidazolidine-2,4-dione                 | C4H6N2O2   | 114.043 | 113.036 | 115.050 | 1.240  |
| 1-Methyluric Acid                      | 1-Mehtyl-2,6,8-trihoxypurine                    | C6H6N4O3   | 182.043 | 181.037 | 183.051 | 2.896  |
| 2,3-Dihydroxybenzoic Acid              |                                                 | C7H6O4     | 154.026 | 153.019 | 155.034 | 7.152  |
| 2,5-Furandicarboxylic Acid             | Dehydromucic Acid                               | C6H4O5     | 156.005 | 154.999 | 157.013 | 6.025  |
| 2-Aminophenol                          |                                                 | C6H7NO     | 109.053 | 108.045 | 110.060 | 0.569  |
| 2-Butyl-3-(4-hydroxybenzoyl)benzofuran | (2-Butylbenzofuran-3-yl)(4-hydroxyphenyl)ketone | C19H18O3   | 294.126 | 293.118 | 295.133 | 11.318 |
| 2-Ethylhexanoic Acid                   |                                                 | C8H16O2    | 144.116 | 143.108 | 145.122 | 10.060 |
| 2-Heptyl-3-Hydroxyl-4-Quinolone        |                                                 | C16H21NO2  | 259.157 | 258.150 | 260.165 | 10.321 |
| 2-Hydroxy-3-methylbutyric Acid         | α-Hydroxyisovaleric Acid                        | C5H10O3    | 118.062 | 117.056 | 119.070 | 4.606  |
| 2-Hydroxyadipic Acid                   | 2-Hydroxyhexanedioic Acid                       | C6H10O5    | 162.052 | 161.046 | 163.060 | 2.131  |
| 2-Hydroxybenzoic Acid                  | o-Salicylic Acid                                | C7H6O3     | 138.031 | 137.024 | 139.039 | 9.148  |
| 2-Oxoglutaric Acid                     | α-Ketoglutaric Acid                             | C5H6O5     | 146.021 | 145.014 | 147.029 | 2.951  |
| 2-Phenylacetamide                      | Acetanilide                                     | C8H9NO     | 135.069 | 134.061 | 136.076 | 6.006  |
| 2-Phenylacetic Acid                    | α-Toluate                                       | C8H8O2     | 136.052 | 135.045 | 137.060 | 8.158  |
| 3,4-Dihydroxybenzoic Acid              | Protocatechuic Acid                             | C7H6O4     | 154.026 | 153.019 | 155.034 | 4.309  |
| 3,5-Dihydroxybenzoic Acid              | α-Resorcylic Acid                               | C7H6O4     | 154.026 | 153.019 | 155.034 | 4.153  |
| 3-Dehydroquinic acid                   |                                                 | C7H10O6    | 190.048 | 189.040 | 191.055 | 0.991  |
| 3-Dehydroshikimic acid                 |                                                 | C7H8O5     | 172.038 | 171.030 | 173.044 | 1.589  |

**Lauren Brink et al. Neonatal diet alters fecal microbiota and metabolome profiles over the first year of life in infants fed breast milk or formula.**

|                             |                                     |            |         |         |         |                                             |
|-----------------------------|-------------------------------------|------------|---------|---------|---------|---------------------------------------------|
| 3-Hydroxybenzoic Acid       | m-Salicylic Acid                    | C7H6O3     | 138.032 | 137.024 | 139.039 | 6.310                                       |
| 3-Hydroxybutyric Acid       | DL-b-Hydroxybutyric Acid            | C4H8O3     | 104.048 | 103.040 | 105.055 | 1.517                                       |
| 3-Hydroxy-DL-Kynurenine     | Hydroxykynurenine                   | C10H12N2O4 | 224.080 | 223.072 | 225.087 | 1.110                                       |
| 3-Methyl-2-oxobutyric Acid  | $\alpha$ -Ketoisovaleric acid       | C5H8O3     | 116.047 | 115.040 | 117.055 | 6.216                                       |
| 3-Methylthiopropionic Acid  | 4-Thiapentanoic Acid                | C4H8O2S    | 120.024 | 119.017 | 121.032 | 5.092                                       |
| 3-Methylxanthine            |                                     | C6H6N4O2   | 166.050 | 165.042 | 167.056 | 3.336                                       |
| 3-O-Methyl-Gallic Acid      | 3,4-dihydroxy-5-methoxybenzoic Acid | C8H8O5     | 184.038 | 183.030 | 185.044 | 5.290                                       |
| 3-Oxoglutaric Acid          | b-Ketoglutaric Acid                 | C5H6O5     | 146.021 | 145.014 | 147.029 | 1.543                                       |
| 4-Ethylphenol               |                                     | C8H10O     | 122.073 | 121.066 | 123.080 | 9.165                                       |
| 4-Ethylphenyl Sulfate       | 4-EPS                               | C8H10O4S   | 202.029 | 201.023 | 203.037 | 10.843                                      |
| 4-Hydroxybenzoic Acid       | p-Salicylic Acid                    | C7H6O3     | 138.031 | 137.024 | 139.039 | 5.576                                       |
| 4-Hydroxyphenylacetic Acid  | p-hydroxyphenylacetic Acid          | C8H8O3     | 152.048 | 151.040 | 153.055 | 5.891                                       |
| 4-Hydroxyphenylpyruvic Acid | 4-Hydroxyphenylpyruvate             | C9H8O4     | 180.042 | 179.035 | 181.050 | 8.220<br><i>pos;</i><br>8.514<br><i>neg</i> |
| 4-Imidazoleacetic Acid      |                                     | C5H6N2O2   | 126.042 | 125.036 | 127.050 | 0.457                                       |
| 4-Imidazoleacrylic Acid     | Urocanic Acid                       | C6H6N2O2   | 138.042 | 137.036 | 139.050 | 0.538                                       |
| 4-Imidazolecarboxylic Acid  |                                     | C4H4N2O2   | 112.027 | 111.020 | 113.035 | 0.566                                       |
| 4-Methylcatechol            | 3,4-dihydroxytoluene                | C7H8O2     | 124.053 | 123.045 | 125.060 | 6.833                                       |
| 4-Methylvaleric Acid        | Isocaproic Acid                     | C6H12O2    | 116.083 | 115.076 | 117.091 | 8.880                                       |
| 4-Oxoproline                |                                     | C5H7NO3    | 129.043 | 128.035 | 130.050 | 0.561                                       |
| 4-Pyridoxic acid            |                                     | C8H9NO4    | 183.054 | 182.046 | 184.060 | 2.618                                       |
| 5-Aminolevulinic acid       |                                     | C5H9NO3    | 131.059 | 130.051 | 132.066 | 0.407                                       |
| 5-Aminovaleric Acid         | 5-Aminovalerate                     | C5H11NO2   | 117.078 | 116.072 | 118.086 | 0.433                                       |
| 5-Hydroxyindole             |                                     | C8H7NO     | 133.052 | 132.045 | 134.060 | 5.250                                       |
| 5-Hydroxyindoleacetic Acid  | 5HIAA                               | C10H9NO3   | 191.059 | 190.051 | 192.066 | 5.732                                       |
| 5-Hydroxylysine             |                                     | C6H14N2O3  | 162.100 | 161.093 | 163.108 | 0.375                                       |
| 5-Hydroxytryptamine         | 5HT                                 | C10H12N2O  | 176.094 | 175.088 | 177.102 | 0.920                                       |
| 5-Hydroxytryptophan         | 5HTP                                | C11H12N2O3 | 220.084 | 219.078 | 221.092 | 1.815                                       |

**Lauren Brink et al. Neonatal diet alters fecal microbiota and metabolome profiles over the first year of life in infants fed breast milk or formula.**

|                                       |                                   |             |         |         |         |        |
|---------------------------------------|-----------------------------------|-------------|---------|---------|---------|--------|
| 6-Hydroxydopamine                     | Oxidopamine                       | C8H11NO3    | 169.073 | 168.067 | 170.081 | 0.450  |
| 6-Sulfatoxymelatonin                  | 6-Hydroxymelatonin Sulfate        | C13H16N2O6S | 328.072 | 327.066 | 329.080 | 8.467  |
| 7 $\alpha$ -Hydroxy-4-cholesten-3-one | C4                                | C27H44O2    | 400.334 | 399.327 | 401.341 | 13.443 |
| Acetic Acid                           | Ethanoic Acid                     | C2H4O2      | 60.021  | 59.014  | 61.028  | 0.977  |
| Acetoacetic Acid                      | Diacetic Acid                     | C4H6O3      | 102.031 | 101.024 | 103.039 | 1.476  |
| Acetylcholine                         |                                   | C7H16NO2    | 146.119 | 145.111 | 147.125 | 0.424  |
| Acetylmuramic Acid                    |                                   | C11H19NO8   | 293.112 | 292.104 | 294.118 | 2.650  |
| Adenine                               |                                   | C5H5N5      | 135.055 | 134.047 | 136.062 | 0.550  |
| Adenosine                             |                                   | C10H13N5O4  | 267.097 | 266.089 | 268.104 | 1.761  |
| Adipic Acid                           | Hexanedioic Acid                  | C6H10O4     | 146.057 | 145.051 | 147.065 | 4.939  |
| $\alpha$ -Hydroxyhippuric Acid        | Benzoylaminoxyacetic Acid         | C9H9NO4     | 195.053 | 194.046 | 196.060 | 8.884  |
| $\alpha$ -Hydroxyisobutyric Acid      | 2-Hydroxybutanoic Acid            | C4H8O3      | 104.048 | 103.040 | 105.055 | 1.851  |
| $\alpha$ -Hydroxyisocaproic Acid      | 2-Hydroxy-4-methylvaleric acid    | C6H12O3     | 132.078 | 131.071 | 133.086 | 6.660  |
| Amantadine                            | 1-Adamantylamine                  | C10H17N     | 151.136 | 150.129 | 152.143 | 4.612  |
| $\alpha$ MCA                          | alpha-Muricholic Acid             | C24H40O5    | 408.288 | 407.280 | 409.295 | 9.787  |
| Aminomalonic Acid                     | 2-aminopropanedioic acid          | C3H5NO4     | 119.021 | 118.015 | 120.029 | 0.880  |
| Anserine                              | $\beta$ -alanyl-N-methylhistidine | C10H16N4O3  | 240.123 | 239.115 | 241.130 | 0.364  |
| Arachidic Acid                        | Eicosanoic Acid                   | C20H40O2    | 312.302 | 311.296 | 313.310 | 14.538 |
| Arachidonic Acid                      | Vitamin F                         | C20H32O2    | 304.241 | 303.233 | 305.248 | 12.674 |
| Arginine                              | ARG                               | C6H14N4O2   | 174.112 | 173.104 | 175.119 | 0.388  |
| Argininosuccinic acid                 |                                   | C10H18N4O6  | 290.123 | 289.115 | 291.130 | 0.529  |
| Asparagine                            | ASN                               | C4H8N2O3    | 132.054 | 131.046 | 133.061 | 0.527  |
| Aspartic Acid                         | ASP                               | C4H7NO4     | 133.038 | 132.030 | 134.045 | 0.608  |
| Atrolactic Acid                       | 2-Phenyllactic Acid               | C9H10O3     | 166.062 | 165.056 | 167.070 | 7.466  |
| Azelaic Acid                          | Nonanedioic Acid                  | C9H16O4     | 188.104 | 187.098 | 189.112 | 8.470  |
| $\beta$ -Alanine                      |                                   | C3H7NO2     | 89.047  | 88.040  | 90.055  | 0.417  |
| Benalfocin                            | SKF 86466                         | C11H14CIN   | 195.081 | 194.074 | 196.089 | 5.037  |
| Benzoic Acid                          | Benzenecarboxylic Acid            | C7H6O2      | 122.036 | 121.030 | 123.044 | 8.190  |
| Betaine                               | Trimethylglycine                  | C5H11NO2    | 117.078 | 116.072 | 118.086 | 0.567  |

**Lauren Brink et al. Neonatal diet alters fecal microbiota and metabolome profiles over the first year of life in infants fed breast milk or formula.**

|                                            |                                                     |            |         |         |         |        |
|--------------------------------------------|-----------------------------------------------------|------------|---------|---------|---------|--------|
| bMCA                                       | beta-Muricholic Acid                                | C24H40O5   | 408.288 | 407.280 | 409.295 | 9.903  |
| b-Pseudouridine                            |                                                     | C9H12N2O6  | 244.070 | 243.062 | 245.077 | 0.912  |
| Butylamine                                 | 1-Aminobutane                                       | C4H11N     | 73.089  | 72.082  | 74.096  | 0.531  |
| Butyric Acid                               | Butanoic Acid                                       | C4H8O2     | 88.053  | 87.045  | 89.060  | 4.976  |
| CA                                         | Cholic Acid                                         | C24H40O5   | 408.288 | 407.280 | 409.295 | 10.179 |
| Caffeic Acid                               | 3,4-dihydroxycinnamate                              | C9H8O4     | 180.042 | 179.035 | 181.050 | 6.443  |
| Caffeine                                   |                                                     | C8H10N4O2  | 194.080 | 193.073 | 195.088 | 6.051  |
| CDCA                                       | Chenodeoxycholic acid                               | C24H40O4   | 392.293 | 391.285 | 393.300 | 10.944 |
| CDCA-S                                     | Chenodeoxycholic Acid-3-Sulfate                     | C24H40O7S  | 472.250 | 471.242 | 473.257 | 13.059 |
| Chlorogenic acid                           | 3-(3,4-Dihydroxycinnamoyl)quinic acid               | C16H18O9   | 354.096 | 353.088 | 355.102 | 6.653  |
| cis-11,12-Methylene Pentadecanoic Acid     |                                                     | C16H30O2   | 254.224 |         | 255.232 | 12.655 |
| cis-11,12-Methylene Pentadecanoylcarnitine |                                                     | C23H43NO4  | 397.319 |         | 398.326 | 10.061 |
| cis-13,14-Methylene Heptadecanoic Acid     |                                                     | C18H34O2   | 282.255 |         | 283.263 | 13.239 |
| cis-13,14-Methylene Heptadecanoylcarnitine |                                                     | C25H47NO4  | 425.350 |         | 426.358 | 9.434  |
| cis-3,4-Methylene Heptanoic acid           |                                                     | C8H14O2    | 142.099 | 141.092 | 143.107 | 9.643  |
| cis-3,4-Methylene heptanoylcarnitine       |                                                     | C15H27N04  | 285.194 |         | 286.201 | 7.291  |
| Citric Acid                                |                                                     | C6H8O7     | 192.026 | 191.020 | 193.034 | 1.761  |
| Citrulline                                 |                                                     | C6H13N3O3  | 175.096 | 174.088 | 176.103 | 0.542  |
| Clomipramine                               |                                                     | C19H23ClN2 | 314.156 | 313.148 | 315.162 | 8.939  |
| CMPF                                       | 3-Carboxy-4-methyl-5-propyl-2-furanpropionic Acid   | C12H16O5   | 240.099 | 239.092 | 241.107 | 9.701  |
| Cortisone                                  | 17 $\alpha$ ,21-dihydroxypregn-4-ene-3,11,20-trione | C21H28O5   | 360.194 | 359.186 | 361.201 | 9.046  |
| Creatine                                   |                                                     | C4H9N3O2   | 131.070 | 130.062 | 132.077 | 0.523  |
| Creatinine                                 |                                                     | C4H7N3O    | 113.059 | 112.052 | 114.066 | 0.404  |

**Lauren Brink et al. Neonatal diet alters fecal microbiota and metabolome profiles over the first year of life in infants fed breast milk or formula.**

|                                             |                                                                     |             |         |         |         |        |
|---------------------------------------------|---------------------------------------------------------------------|-------------|---------|---------|---------|--------|
| Crotonobetaine                              | Croton Betaine                                                      | C7H13NO2    | 143.094 | 142.087 | 144.102 | 0.439  |
| Cyclohexanecarboxylic Acid                  |                                                                     | C7H12O2     | 128.084 | 127.076 | 129.091 | 8.945  |
| Cyclopropylacetic acid                      |                                                                     | C5H8O2      | 100.052 |         | 101.060 | 5.573  |
| Cyclopropylacetylcarnitine                  |                                                                     | C12H21NO4   | 243.147 |         | 244.154 | 1.611  |
| Cystathionine                               |                                                                     | C7H14N2O4S  | 222.068 | 221.060 | 223.075 | 0.500  |
| Cysteine                                    | CYS                                                                 | C3H7NO2S    | 121.020 | 120.012 | 122.027 | 0.575  |
| Cystine                                     | oxidized cysteine                                                   | C6H12N2O4S2 | 240.023 | 239.017 | 241.031 | 0.518  |
| D-(+)-Glucose                               |                                                                     | C6H12O6     | 180.063 | 179.056 | 181.071 | 0.585  |
| D-2-Aminobutyric Acid                       |                                                                     | C4H9NO2     | 103.064 | 102.056 | 104.071 | 0.554  |
| DCA                                         | Deoxycholic acid                                                    | C24H40O4    | 392.293 | 391.285 | 393.300 | 11.036 |
| Decanoic Acid                               | Capric Acid                                                         | C10H20O2    | 172.147 | 171.139 | 173.154 | 11.074 |
| Difenpiramide                               |                                                                     | C19H16N2O   | 288.127 | 287.119 | 289.134 | 10.225 |
| Dihydro Isoferulic Acid 3-o-b-D-Glucuronide | 5-(2-Carboxyethyl)-2-methoxyphenyl beta-D-glucopyranosiduronic acid | C16H20O10   | 372.105 | 371.098 | 373.113 | 7.224  |
| Dihydrocaffeic acid                         | 3,4-Dihydroxyhydrocinnamic acid                                     | C9H10O4     | 182.058 | 181.051 | 183.065 | 5.903  |
| Dihydroferulic Acid                         | 3-(4-hydroxy-3-methoxyphenyl) propionic Acid                        | C10H12O4    | 196.074 | 195.066 | 197.081 | 7.453  |
| Dihydroferulic Acid-4-Sulfate               | 3-(3-methoxy-4-sulfooxyphenyl) propionic Acid                       | C10H12O7S   | 276.031 | 275.023 | 277.038 | 8.553  |
| Dihydrozeatin Riboside                      |                                                                     | C15H23N5O5  | 353.170 | 352.163 | 354.177 | 5.836  |
| Dikegulac                                   | Diprogulic Acid                                                     | C12H18O7    | 274.106 | 273.098 | 275.113 | 8.663  |
| Dimethylalanine                             | N,N-Dimethyl-L-alanine                                              | C5H11NO2    | 117.080 | 116.072 | 118.086 | 0.606  |
| DL-3-Aminoisobutyric Acid                   | 3-aminoisobutanoic Acid                                             | C4H9NO2     | 103.064 | 102.056 | 104.071 | 0.441  |
| Dodecanedioic Acid                          |                                                                     | C12H22O4    | 230.151 | 229.145 | 231.159 | 9.802  |
| Dodecanoic Acid                             | Lauric Acid                                                         | C12H24O2    | 200.178 | 199.170 | 201.185 | 11.819 |
| Dopamine                                    |                                                                     | C8H11NO2    | 153.078 | 152.072 | 154.086 | 0.486  |
| D-Sedoheptulose-7-Phosphate                 |                                                                     | C7H15O10P   | 290.041 | 289.033 | 291.048 | 1.461  |
| D-Sphingosine                               |                                                                     | C18H37O2N   | 299.283 | 298.275 | 300.290 | 9.838  |
| Ectoine                                     |                                                                     | C6H10N2O2   | 142.075 | 141.067 | 143.082 | 0.568  |
| Enanthic Acid                               | Heptanoic Acid                                                      | C7H14O2     | 130.099 | 129.092 | 131.107 | 9.703  |

**Lauren Brink et al. Neonatal diet alters fecal microbiota and metabolome profiles over the first year of life in infants fed breast milk or formula.**

|                       |                                    |            |         |         |         |        |
|-----------------------|------------------------------------|------------|---------|---------|---------|--------|
| Equol                 |                                    | C15H14O3   | 242.094 | 241.087 | 243.102 | 9.407  |
| Equol-4'-Sulfate      |                                    | C15H14O6S  | 322.051 | 321.044 | 323.058 | 10.650 |
| Ergothioneine         |                                    | C9H15N3O2S | 229.089 | 228.081 | 230.096 | 0.648  |
| Estriol               | Oestriol                           | C18H24O3   | 288.172 | 287.165 | 289.180 | 8.768  |
| Ethanolamine          | 2-aminoethanol                     | C2H7NO     | 61.053  | 60.045  | 62.060  | 0.404  |
| Ethyl-b-D-Glucuronide |                                    | C8H14O7    | 222.073 | 221.067 | 223.081 | 2.106  |
| Ferulic Acid          | 4-Hydroxy-3-methoxycinnamic Acid   | C10H10O4   | 194.057 | 193.051 | 195.065 | 7.888  |
| Folic Acid            | Folate                             | C19H19N7O6 | 441.139 | 440.132 | 442.147 | 6.134  |
| Fructose              |                                    | C6H12O6    | 180.063 | 179.056 | 181.071 | 0.600  |
| Fumaric Acid          | trans-Butenedioic Acid             | C4H4O4     | 116.010 | 115.004 | 117.018 | 2.134  |
| Galactitol            | Dulcitol                           | C6H14O6    | 182.078 | 181.072 | 183.086 | 0.580  |
| Gallic Acid           | 3,4,5-Trihydroxybenzoic Acid       | C7H6O5     | 170.022 | 169.014 | 171.029 | 2.057  |
| GCA                   | Glycocholic acid                   | C26H43NO6  | 465.310 | 464.302 | 466.316 | 9.688  |
| GCDCA                 | Glycochenodeoxycholic Acid         | C26H43NO5  | 449.315 | 448.307 | 450.321 | 10.271 |
| GDCA                  | Glycodeoxycholic Acid              | C26H43NO5  | 449.315 | 448.307 | 450.321 | 10.377 |
| Genistein             | 4',5,7-Trihydroxyisoflavone        | C15H10O5   | 270.053 | 269.046 | 271.060 | 9.451  |
| Genistin              | Genistein-7-Glucoside              | C21H20O10  | 432.106 | 431.098 | 433.113 | 8.140  |
| Gentisic acid         | 2,5-Dihydroxybenzoate              | C7H6O4     | 154.027 | 153.019 | 155.034 | 6.472  |
| GHCA                  | Glycohyocholic Acid                | C26H43NO6  | 465.310 | 464.302 | 466.316 | 9.501  |
| GHDCA                 | Glycohyodeoxycholic Acid           | C26H43NO5  | 449.315 | 448.307 | 450.321 | 9.722  |
| GLCA                  | Glycolithocholic Acid              | C26H43NO4  | 433.320 | 432.312 | 434.326 | 11.136 |
| Gluconic Acid         |                                    | C6H12O7    | 196.058 | 195.051 | 197.066 | 0.770  |
| Glutamic Acid         | GLU                                | C5H9NO4    | 147.054 | 146.046 | 148.060 | 0.565  |
| Glutamine             | GLN                                | C5H10N2O3  | 146.070 | 145.062 | 147.076 | 0.534  |
| Glutaric Acid         | Pentanedioic Acid                  | C5H8O4     | 132.042 | 131.035 | 133.050 | 2.546  |
| Glycerol-3-phosphate  |                                    | C3H9O6P    | 172.013 | 173.021 | 171.006 | 1.668  |
| Glycine               | GLY                                | C2H5NO2    | 75.033  | 74.025  | 76.039  | 0.510  |
| Glycitein             | 4',7-Dihydroxy-6-methoxyisoflavone | C16H12O5   | 284.069 | 283.061 | 285.076 | 9.010  |
| Glycylvaline          |                                    | C7H14N2O3  | 174.101 | 173.093 | 175.108 | 0.682  |



**Lauren Brink et al. Neonatal diet alters fecal microbiota and metabolome profiles over the first year of life in infants fed breast milk or formula.**

|                                      |                                                   |            |         |         |         |        |
|--------------------------------------|---------------------------------------------------|------------|---------|---------|---------|--------|
| GUDCA                                | Glycoursodeoxycholic Acid                         | C26H43NO5  | 449.315 | 448.307 | 450.321 | 9.735  |
| HCA                                  | Hyocholic acid                                    | C24H40O5   | 408.288 | 407.280 | 409.295 | 10.030 |
| HDCA                                 | Hyodeoxycholic acid                               | C24H40O4   | 392.293 | 391.285 | 393.300 | 10.340 |
| Heneicosanoic Acid                   | Heneicosylic Acid                                 | C21H42O2   | 326.318 | 325.311 | 327.326 | 15.153 |
| Heptadecanoic Acid                   | Margaric Acid                                     | C17H34O2   | 270.256 | 269.249 |         | 13.372 |
| Hexadecanedioic Acid                 |                                                   | C16H30O4   | 286.214 | 285.207 | 287.222 | 11.159 |
| Hexadecanoic acid                    | Palmitic acid                                     | C16H32O2   | 256.240 | 255.233 | 257.248 | 13.050 |
| Hexanoic Acid                        | Caproic acid                                      | C6H12O2    | 116.084 | 115.076 | 117.091 | 8.959  |
| Histidine                            | HIS                                               | C6H9N3O2   | 155.069 | 154.062 | 156.077 | 0.386  |
| Hydrocinnamic Acid                   | Phenylpropionic Acid                              | C9H10O2    | 150.068 | 149.061 | 151.075 | 9.017  |
| Hydroumbellic Acid                   | 3-(2,4-dihydroxyphenyl)propanoic Acid             | C9H10O4    | 182.058 | 181.051 | 183.065 | 5.971  |
| Hydroxyphenyllactic Acid             | DL-p-Hydroxyphenyllactic Acid                     | C9H10O4    | 182.058 | 181.051 | 183.065 | 5.385  |
| Hypotaurine                          |                                                   | C2H7NO2S   | 109.020 | 108.012 | 110.027 | 0.567  |
| Imidazolepropionic Acid              | Dihydrourocanic acid                              | C6H8N2O2   | 140.058 | 139.051 | 141.066 | 0.458  |
| Indole                               |                                                   | C8H7N      | 117.057 | 116.051 | 118.065 | 9.276  |
| Indole-2-Carboxylic Acid             |                                                   | C9H7NO2    | 161.048 | 160.040 | 162.055 | 9.019  |
| Indole-3-Acetic Acid                 | $\beta$ -indole-3-acetic acid                     | C10H9NO2   | 175.064 | 174.056 | 176.071 | 8.349  |
| Indole-3-Acrylic Acid                | 3-(1H-Indol-3-yl)-2-propenoic acid                | C11H9NO2   | 187.064 | 186.056 | 188.071 | 8.857  |
| Indole-3-Carboxaldehyde              | b-Indolylaldehyde                                 | C9H7NO     | 145.053 | 144.045 | 146.060 | 7.971  |
| Indole-3-Lactic Acid                 |                                                   | C11H11NO3  | 205.073 | 204.067 | 206.081 | 7.843  |
| Indole-3-Pyruvic Acid                |                                                   | C11H9NO3   | 203.059 | 202.051 | 204.066 | 9.126  |
| Indoxyl-b-D-Glucuronide              |                                                   | C14H15NO7  | 309.085 | 308.078 | 310.092 | 6.570  |
| Inosine                              |                                                   | C10H12N4O5 | 268.080 | 267.073 | 269.088 | 2.555  |
| Isobutyric Acid                      | 2-Methylpropanoic Acid                            | C4H8O2     | 88.053  | 87.045  | 89.060  | 5.058  |
| Isocitric Acid                       |                                                   | C6H8O7     | 192.028 | 191.020 | 193.034 | 1.203  |
| Isoferulic Acid 3-o-Sulfate          | 3-[4-Methoxy-3-(sulfooxy)phenyl]-2-propenoic Acid | C10H10O7S  | 274.015 | 273.007 | 275.022 | 9.221  |
| Isoferulic Acid-3-o-b-D-Glucuruonide |                                                   | C16H18O10  | 370.091 | 369.083 | 371.097 | 7.177  |
| Isoguanine                           | 2-Hydroxyadenine                                  | C5H5N5O    | 151.050 | 150.042 | 152.057 | 0.446  |

**Lauren Brink et al. Neonatal diet alters fecal microbiota and metabolome profiles over the first year of life in infants fed breast milk or formula.**

|                            |                               |               |         |         |         |        |
|----------------------------|-------------------------------|---------------|---------|---------|---------|--------|
| Isoleucine                 | ILE                           | C6H13NO2      | 131.095 | 130.087 | 132.102 | 1.072  |
| Isovaleric Acid            | 3-Methylbutanoic acid         | C5H10O2       | 102.068 | 101.061 | 103.075 | 7.131  |
| Kasugamycin                |                               | C14H25N3O9    | 379.160 | 378.152 | 380.166 | 0.390  |
| Kynurenic Acid             |                               | C10H7NO3      | 189.043 | 188.035 | 190.050 | 7.517  |
| Lactic Acid                | 2-Hydroxypropanoic acid       | C3H6O3        | 90.032  | 89.024  | 91.039  | 1.015  |
| L-a-Hydroxyglutaric Acid   | 2-Hydroxyglutaric Acid        | C5H8O5        | 148.038 | 147.030 | 149.044 | 1.285  |
| L-Alanine                  | ALA                           | C3H7NO2       | 89.048  | 88.040  | 90.055  | 0.522  |
| LCA                        | Lithocholic Acid              | C24H40O3      | 376.298 | 375.290 | 377.305 | 12.009 |
| L-Carnitine                |                               | C7H15NO3      | 161.106 | 160.098 | 162.112 | 0.418  |
| L-DOPA                     | 3,4-Dihydroxy-L-Phenylalanine | C9H11NO4      | 197.069 | 196.062 | 198.076 | 0.809  |
| Leucine                    | LEU                           | C6H13NO2      | 131.095 | 130.087 | 132.102 | 1.152  |
| L-Glutathione Oxidized     | GSSG                          | C20H32N6O12S2 | 612.151 | 611.145 | 613.159 | 2.109  |
| L-Glutathione Reduced      | GSH                           | C10H17N3O6S   | 307.083 | 306.077 | 308.091 | 1.130  |
| L-Homocysteine             |                               | C4H9NO2S      | 135.035 | 134.028 | 136.043 | 0.590  |
| L-Homoserine               |                               | C4H9NO3       | 119.059 | 118.051 | 120.066 | 0.524  |
| L-Kynurenine               |                               | C10H12N2O3    | 208.085 | 207.078 | 209.092 | 2.025  |
| L-Phenylalanine            | PHE                           | C9H11NO2      | 165.080 | 164.072 | 166.086 | 2.482  |
| L-Pipecolic Acid           | L-Homoproline                 | C6H11NO2      | 129.078 | 128.072 | 130.086 | 0.737  |
| L-Pyroglutamic Acid        |                               | C5H7NO3       | 129.042 | 128.035 | 130.050 | 1.577  |
| L-Saccharophine            |                               | C11H20N2O6    | 276.133 | 275.125 | 277.139 | 0.556  |
| Lysine                     | LYS                           | C6H14N2O2     | 146.106 | 145.098 | 147.113 | 0.381  |
| Maleic Acid                | cis-Butenedioic Acid          | C4H4O4        | 116.010 | 115.004 | 117.018 | 4.726  |
| Malic Acid                 | 2-Hydroxybutanedioic Acid     | C4H6O5        | 134.021 | 133.014 | 135.029 | 1.200  |
| m-Coumaric Acid            | trans-3-Hydroxycinnamic Acid  | C9H8O3        | 164.047 | 163.040 | 165.055 | 8.010  |
| Metconazole                |                               | C17H22ClN3O   | 319.146 | 318.138 | 320.152 | 10.872 |
| Methionine                 | MET                           | C5H11NO2S     | 149.052 | 148.044 | 150.058 | 0.823  |
| Methyl Vanillate           |                               | C9H10O4       | 182.058 | 181.051 | 183.065 | 8.615  |
| Methyl-2-oxovaleric Acid   | Ketoisoleucine                | C6H10O3       | 130.062 | 129.056 | 131.070 | 8.222  |
| Methyl-a-D-Glucopyranoside |                               | C7H14O6       | 194.080 | 193.072 | 195.086 | 0.827  |

**Lauren Brink et al. Neonatal diet alters fecal microbiota and metabolome profiles over the first year of life in infants fed breast milk or formula.**

|                                |                                             |            |         |         |         |        |
|--------------------------------|---------------------------------------------|------------|---------|---------|---------|--------|
| Methylguanidine                |                                             | C2H7N3     | 73.065  | 72.057  | 74.071  | 0.398  |
| Methylmalonic Acid             | 2-Methylpropanedioic Acid                   | C4H6O4     | 118.026 | 117.019 | 119.034 | 2.503  |
| Methylsuccinic Acid            |                                             | C5H8O4     | 132.042 | 131.035 | 133.050 | 3.661  |
| Mevalonic Acid                 | MVA                                         | C6H12O4    | 148.074 | 147.066 | 149.081 | 1.812  |
| Mycophenolic Acid              |                                             | C17H20O6   | 320.127 | 319.119 | 321.133 | 9.866  |
| Mycophenolic Acid Glucuronide  |                                             | C23H28O12  | 496.159 | 495.151 | 497.165 | 8.814  |
| myo-Inositol                   |                                             | C6H12O6    | 180.063 | 179.056 | 181.071 | 0.553  |
| Myristoyl-L-carnitine (C14)    | C14-Carnitine                               | C21H41NO4  | 371.304 | 370.296 | 372.311 | 9.995  |
| N-(3-Phenylpropionyl)glycine   |                                             | C11H13NO3  | 207.090 | 206.082 | 208.097 | 8.026  |
| N,N-dimethylglycine            | N,N-Dimethylglycine                         | C4H9NO2    | 103.063 | 102.056 | 104.071 | 0.558  |
| N1,N12-Diacetylspermine        |                                             | C14H30N4O2 | 286.236 | 285.230 | 287.244 | 0.366  |
| N-Acetyl-b-D-Glucosaminylamine | 2-Acetamido-2-Deoxy-B-D-Glucopyranosylamine | C8H16N2O5  | 220.106 | 219.099 | 221.113 | 0.663  |
| N-Acetyl-L-Methionine          |                                             | C7H13NO3S  | 191.062 | 190.054 | 192.069 | 5.632  |
| N-Acetylneuraminic Acid        | NANA                                        | C11H19NO9  | 309.105 | 308.099 | 310.113 | 1.204  |
| Naltrindole                    |                                             | C26H26N2O3 | 414.195 | 413.187 | 415.202 | 7.909  |
| N-Carbamoylsarcosine           | 3-Methylhydantoin                           | C4H8N2O3   | 132.054 | 131.046 | 133.061 | 1.151  |
| N-Cinnamylglycine              | Cinnamoylglycine                            | C11H11NO3  | 205.074 | 204.067 | 206.081 | 8.321  |
| Neopterin                      |                                             | C9H11N5O4  | 253.082 | 252.074 | 254.088 | 0.885  |
| Nicotinamide                   | Vitamin B3                                  | C6H6N2O    | 122.047 | 121.041 | 123.055 | 0.948  |
| Nicotinic Acid                 | 3-Pyridinecarboxylic Acid                   | C6H5NO2    | 123.033 | 122.025 | 124.039 | 1.090  |
| N-Methylhistidine              |                                             | C7H11N3O2  | 169.085 | 168.078 | 170.092 | 0.389  |
| Nonadecanoic Acid              | Nonadecyclic Acid                           | C19H38O2   | 298.288 | 297.280 |         | 14.119 |
| Nonanoic acid                  | Pelargonic Acid                             | C9H18O2    | 158.130 | 157.123 |         | 10.656 |
| N-Palmitoyl serinol            |                                             | C19H39NO3  | 329.292 | 328.286 | 330.300 | 11.928 |
| Nε,Nε,Nε-Trimethyllysine       | N6,N6,N6-trimethyllysine                    | C9H20N2O2  | 188.153 | 187.145 | 189.160 | 0.380  |
| Nω-Acetylhistamine             |                                             | C7H11N3O   | 153.090 | 152.083 | 154.097 | 0.444  |
| o-Acetylserine                 | OASS                                        | C5H9NO4    | 147.053 | 146.046 | 148.060 | 0.607  |
| Octadecanedioic Acid           |                                             | C18H34O4   | 314.245 | 313.238 | 315.253 | 11.788 |
| Octadecanoic acid              | Stearic Acid                                | C18H36O2   | 284.272 | 283.264 | 285.279 | 13.725 |

## On-line Supplementary Material

**Lauren Brink et al. Neonatal diet alters fecal microbiota and metabolome profiles over the first year of life in infants fed breast milk or formula.**

|                             |                                 |              |         |         |         |        |
|-----------------------------|---------------------------------|--------------|---------|---------|---------|--------|
| Octanoic Acid               | Caprylic Acid                   | C8H16O2      | 144.114 | 143.108 | 145.122 | 10.262 |
| o-Desmethylangolensin       | o-DMA                           | C15H14O4     | 258.090 | 257.082 | 259.096 | 9.658  |
| o-Hydroxyhippuric acid      | Salicyluric Acid                | C9H9NO4      | 195.054 | 194.046 | 196.060 | 7.368  |
| Oleic Acid                  | (9Z)-Octadec-9-enoic acid       | C18H34O2     | 282.256 | 281.249 | 283.263 | 13.119 |
| O-Phospho-L-serine          |                                 | C3H8NO6P     | 185.009 | 184.002 | 186.016 | 1.244  |
| Ornithine                   | 5-amino norvaline               | C5H12N2O2    | 132.089 | 131.083 | 133.097 | 0.377  |
| Orotic Acid                 |                                 | C5H4N2O4     | 156.018 | 155.010 | 157.024 | 2.881  |
| Oxamic Acid                 | Aminooxoacetic Acid             | C2H3NO3      | 89.011  | 88.004  | 90.019  | 1.539  |
| Palmitoyl-L-carnitine (C16) | C16-Carnitine                   | C23H45NO4    | 399.335 | 398.328 | 400.342 | 10.434 |
| p-Aminobenzoic Acid         | 4-aminobenzoic acid             | C7H7NO2      | 137.048 | 136.040 | 138.055 | 3.725  |
| p-Coumaric acid             | 4-Hydroxycinnamic acid          | C9H8O3       | 164.048 | 163.040 | 165.055 | 7.405  |
| p-Cresol Glucuronide        |                                 | C13H16O7     | 284.089 | 283.082 | 285.097 | 7.668  |
| p-Cresol Sulfate            |                                 | C7H8O4S      | 188.015 | 187.007 | 189.022 | 9.538  |
| Pentadecanoic Acid          | Pentadecyclic Acid              | C15H30O2     | 242.225 | 241.217 |         | 12.751 |
| Penthiopyrad                |                                 | C16H20F3N3OS | 359.128 | 358.121 | 360.135 | 11.121 |
| Phenethylamine              |                                 | C8H11N       | 121.089 | 120.082 | 122.096 | 1.126  |
| Phenol                      |                                 | C6H6O        | 94.042  | 93.035  | 95.049  | 6.305  |
| Phenylacetaldehyde          |                                 | C8H8O        | 120.058 | 119.050 | 121.065 | 8.741  |
| Phenylacetic Acid           |                                 | C8H8O2       | 136.053 | 135.045 | 137.060 | 8.137  |
| Phenylacetylglutamine       | N2-(2-Phenylacetyl)-L-glutamine | C13H16N2O4   | 264.110 | 263.104 | 265.118 | 6.538  |
| Phenylacetylglucine         | Phenaceturic Acid               | C10H11NO3    | 193.074 | 192.067 | 194.081 | 6.816  |
| Phenylethanolamine          | 2-Amino-1-Phenylethanol         | C8H11NO      | 137.084 | 136.077 | 138.091 | 0.690  |
| Phloretic Acid              | Desaminotyrosine                | C9H10O3      | 166.062 | 165.056 | 167.070 | 8.021  |
| Phloroglucinol              | 1,3,5-Trihydroxybenzene         | C6H6O3       | 126.032 | 125.024 | 127.039 | 1.426  |
| Phosphocreatine             | Creatine Phosphate              | C4H10N3O5P   | 211.036 | 210.029 | 212.043 | 1.165  |
| Phytanic Acid               |                                 | C20H40O2     | 312.303 | 311.296 | 313.310 | 13.941 |
| Pimelic Acid                | Heptanedioic Acid               | C7H12O4      | 160.073 | 159.066 | 161.081 | 6.202  |
| Piperine                    |                                 | C17H19NO3    | 285.137 | 284.129 | 286.144 | 10.373 |
| Proline                     | PRO                             | C5H9NO2      | 115.064 | 114.056 | 116.071 | 0.610  |

**Lauren Brink et al. Neonatal diet alters fecal microbiota and metabolome profiles over the first year of life in infants fed breast milk or formula.**

|                         |                                      |                  |         |         |         |        |
|-------------------------|--------------------------------------|------------------|---------|---------|---------|--------|
| Propachlor              |                                      | C11H14ClNO       | 211.077 | 210.069 | 212.084 | 9.959  |
| Propionic Acid          | Propanoic Acid                       | C3H6O2           | 74.037  | 73.030  | 75.044  | 2.073  |
| Protocatechuic Acid     | 3,4-Dihydroxybenzoic Acid            | C7H6O4           | 154.026 | 153.019 | 155.034 | 4.289  |
| Pyrocatechol            | 1,2-dihydroxybenzene                 | C6H6O2           | 110.037 | 109.030 | 111.044 | 4.205  |
| Pyrogallol              | 1,2,3-Trihydroxybenzene              | C6H6O3           | 126.032 | 125.024 | 127.039 | 1.869  |
| Quercetin               |                                      | C15H10O7         | 302.042 | 301.035 | 303.050 | 9.103  |
| Quinic Acid             |                                      | C7H12O6          | 192.064 | 191.056 | 193.071 | 0.847  |
| rac-Methyl Ephedrine    | DL-Methylephedrine                   | C11H17NO         | 179.132 | 178.124 | 180.138 | 2.043  |
| Raffinose               |                                      | C18H32O16        | 504.168 | 503.162 | 505.176 | 0.693  |
| Ralgin                  |                                      | C12H16N2O2       | 220.122 | 219.114 | 221.128 | 7.987  |
| Riboflavin              | Vitamin B2                           | C17H20N4O6       | 376.138 | 375.131 | 377.146 | 6.705  |
| Rutin                   | sophorin                             | C27H30O16        | 610.153 | 609.146 | 611.161 | 7.969  |
| Sarcosine               | N-Methylglycine                      | C3H7NO2          | 89.047  | 88.040  | 90.055  | 0.527  |
| Sebacic Acid            | Decanedioic Acid                     | C10H18O4         | 202.120 | 201.113 | 203.128 | 9.030  |
| Seleno-L-cystine        |                                      | C6H12N2O4[80]Se2 | 335.912 | 334.905 | 336.920 | 0.530  |
| Serine                  | SER                                  | C3H7NO3          | 105.043 | 104.035 | 106.050 | 0.522  |
| Shikimic Acid           |                                      | C7H10O5          | 174.052 | 173.046 | 175.060 | 0.853  |
| Sinapinic Acid          | 3,5-Dimethoxy-4-hydroxycinnamic Acid | C11H12O5         | 224.068 | 223.061 | 225.076 | 8.025  |
| Skatole                 | 3-Methylindole                       | C9H9N            | 131.073 | 130.066 | 132.081 | 10.001 |
| SN-38 carboxylate form  |                                      | C22H20N2O6       | 408.132 | 407.125 | 409.139 | 8.738  |
| Spermidine              |                                      | C7H19N3          | 145.157 | 144.151 | 146.165 | 0.341  |
| Spermine                |                                      | C10H26N4         | 202.215 | 201.208 | 203.223 | 0.348  |
| Sphingosine-1-phosphate | S1P                                  | C18H38NO5P       | 379.248 | 378.241 | 380.256 | 10.746 |
| SR95531                 | Gabazine                             | C15H17N3O3       | 287.128 | 286.120 | 288.134 | 6.522  |
| Stachydrine             |                                      | C7H13NO2         | 143.095 | 142.087 | 144.102 | 0.634  |
| Stercobilin             |                                      | C33H46N4O6       | 594.341 | 593.334 | 595.349 | 8.516  |
| Suberic Acid            | Octanedioic Acid                     | C8H14O4          | 174.090 | 173.082 | 175.096 | 7.584  |
| Succinic Acid           | Butanedioic Acid                     | C4H6O4           | 118.026 | 117.019 | 119.034 | 1.401  |
| Sucrose                 |                                      | C12H22O11        | 342.116 | 341.109 | 343.123 | 0.670  |

**Lauren Brink et al. Neonatal diet alters fecal microbiota and metabolome profiles over the first year of life in infants fed breast milk or formula.**

|                                        |                                     |            |         |         |         |        |
|----------------------------------------|-------------------------------------|------------|---------|---------|---------|--------|
| Syringic Acid                          | 3,5-Dimethoxy-4-hydroxybenzoic acid | C9H10O5    | 198.053 | 197.046 | 199.060 | 6.694  |
| TaMCA                                  | Tauro-alpha-Muricholic Acid         | C26H45NO7S | 515.292 | 514.284 | 516.299 | 10.084 |
| Tartronic Acid                         | 2-Hydroxymalonic Acid               | C3H4O5     | 120.005 | 118.999 | 121.013 | 1.597  |
| Taurine                                | 2-aminoethanesulfonic acid          | C2H7NO3S   | 125.014 | 124.007 | 126.022 | 0.565  |
| TbMCA                                  | Tauro-beta-Muricholic Acid          | C26H45NO7S | 515.292 | 514.284 | 516.299 | 10.180 |
| TCA                                    | Taurocholic acid                    | C26H45NO7S | 515.292 | 514.284 | 516.299 | 10.800 |
| TCDCA                                  | Taurochenodeoxycholic Acid          | C26H45NO6S | 499.297 | 498.289 | 500.304 | 12.194 |
| TDCA                                   | Taurodeoxycholic acid               | C26H45NO6S | 499.297 | 498.289 | 500.304 | 14.930 |
| Tetradecanedioic Acid                  |                                     | C14H26O4   | 258.183 | 257.176 | 259.190 | 10.490 |
| Tetradecanoic Acid                     | Myristic Acid                       | C14H28O2   | 228.209 | 227.202 | 229.216 | 12.467 |
| THCA                                   | Taurohyocholic Acid                 | C26H45NO7S | 515.292 | 514.284 | 516.299 | 10.401 |
| THDCA                                  | Taurohyodeoxycholic Acid            | C26H45NO6S | 499.297 | 498.289 | 500.304 | 10.754 |
| Threonine                              | THR                                 | C4H9NO3    | 119.059 | 118.051 | 120.066 | 0.535  |
| Tiglic Acid                            | 2,3-Dimethylacrylic Acid            | C5H8O2     | 100.052 | 99.045  | 101.060 | 6.969  |
| Tilivalline                            |                                     | C20H19N3O2 | 333.147 | 332.140 | 334.155 | 9.222  |
| trans-3,4-Methylene heptanoic acid     |                                     | C8H14O2    | 142.099 | 141.092 | 143.107 | 9.717  |
| trans-3,4-Methylene heptanoylcarnitine |                                     | C15H27N04  | 285.194 |         | 286.201 | 7.464  |
| trans-4-Hydroxyproline                 |                                     | C5H9NO3    | 131.059 | 130.051 | 132.066 | 0.551  |
| trans-Cinnamic Acid                    | 3-Phenylacrylic acid                | C9H8O2     | 148.053 | 147.045 | 149.060 | 9.139  |
| Tridecanoic Acid                       | Tridecyclic Acid                    | C13H26O2   | 214.194 | 213.186 | 215.201 | 12.158 |
| Trigonelline                           | N-methylnicotinate                  | C7H7NO2    | 137.048 | 136.040 | 138.055 | 0.588  |
| Trimethylamine                         | TMA                                 | C3H9N      | 59.074  | 58.066  | 60.081  | 0.391  |
| Trimethylamine-N-oxide                 | TMAO                                | C3H9NO     | 75.069  | 74.061  | 76.076  | 0.398  |
| Tryptamine                             | 1H-indole-3-ethanamine              | C10H12N2   | 160.100 | 159.093 | 161.107 | 2.382  |
| Tryptamine                             | 1H-indole-3-ethanamine              | C10H12N2   | 160.100 | 159.093 | 161.107 | 2.112  |
| Tryptophan                             | TRP                                 | C11H12N2O2 | 204.090 | 203.083 | 205.097 | 4.427  |
| Tubermycin B                           | Phenazine-1-carboxylic Acid         | C13H8N2O2  | 224.058 | 223.051 | 225.066 | 9.460  |
| TUDCA                                  | Tauroursodeoxycholic Acid           | C26H45NO6S | 499.297 | 498.289 | 500.304 | 10.878 |

**Lauren Brink et al. Neonatal diet alters fecal microbiota and metabolome profiles over the first year of life in infants fed breast milk or formula.**

|                            |                                |                                                               |         |         |         |        |
|----------------------------|--------------------------------|---------------------------------------------------------------|---------|---------|---------|--------|
| Tyrosine                   | TYR                            | C <sub>9</sub> H <sub>11</sub> NO <sub>3</sub>                | 181.074 | 180.067 | 182.081 | 1.087  |
| UDCA                       | Ursodeoxycholic acid           | C <sub>24</sub> H <sub>40</sub> O <sub>4</sub>                | 392.293 | 391.285 | 393.300 | 10.324 |
| UDCA-S                     | Ursodeoxycholic Acid-3-Sulfate | C <sub>24</sub> H <sub>40</sub> O <sub>7</sub> S              | 472.250 | 471.242 | 473.257 | 11.563 |
| Undecanedioic Acid         | 1,9-Nonanedicarboxylic acid    | C <sub>11</sub> H <sub>20</sub> O <sub>4</sub>                | 216.136 | 215.129 | 217.143 | 9.421  |
| Undecanoic Acid            | Undecyclic Acid                | C <sub>11</sub> H <sub>22</sub> O <sub>2</sub>                | 186.163 | 185.155 | 187.169 | 11.458 |
| Uracil                     |                                | C <sub>4</sub> H <sub>4</sub> N <sub>2</sub> O <sub>2</sub>   | 112.027 | 111.020 | 113.035 | 0.905  |
| Urea                       |                                | CH <sub>4</sub> N <sub>2</sub> O                              | 60.033  | 59.025  | 61.040  | 0.594  |
| Uric Acid                  |                                | C <sub>5</sub> H <sub>4</sub> N <sub>4</sub> O <sub>3</sub>   | 168.028 | 167.021 | 169.036 | 1.047  |
| Uridine                    |                                | C <sub>9</sub> H <sub>12</sub> N <sub>2</sub> O <sub>6</sub>  | 244.069 | 243.062 | 245.077 | 1.484  |
| Urobilin                   | Urochrome                      | C <sub>33</sub> H <sub>42</sub> N <sub>4</sub> O <sub>6</sub> | 590.311 | 589.303 | 591.318 | 8.423  |
| Urobilinogen               |                                | C <sub>33</sub> H <sub>44</sub> N <sub>4</sub> O <sub>6</sub> | 592.327 | 591.319 | 593.333 | 10.122 |
| Urolithin A                |                                | C <sub>13</sub> H <sub>8</sub> O <sub>4</sub>                 | 228.043 | 227.035 | 229.050 | 8.873  |
| Valeric Acid               | Pentanoic Acid                 | C <sub>5</sub> H <sub>10</sub> O <sub>2</sub>                 | 102.069 | 101.061 | 103.075 | 7.444  |
| Valine                     | VAL                            | C <sub>5</sub> H <sub>11</sub> NO <sub>2</sub>                | 117.078 | 116.072 | 118.086 | 0.666  |
| Xanthurenic acid           |                                | C <sub>10</sub> H <sub>7</sub> NO <sub>4</sub>                | 205.038 | 204.030 | 206.045 | 7.233  |
| γ-Aminobutyric Acid        | 4-aminobutanoic Acid           | C <sub>4</sub> H <sub>9</sub> NO <sub>2</sub>                 | 103.064 | 102.056 | 104.071 | 0.406  |
| γ-Glutamylphenylalanine    |                                | C <sub>14</sub> H <sub>18</sub> N <sub>2</sub> O <sub>5</sub> | 294.121 | 293.114 | 295.129 | 5.751  |
| α-D(+)-Mannose 1-phosphate | Mannose-1P                     | C <sub>6</sub> H <sub>13</sub> O <sub>9</sub> P               | 260.029 | 259.022 | 261.037 | 1.599  |
| α-D-Glucose 1-phosphate    |                                | C <sub>6</sub> H <sub>13</sub> O <sub>9</sub> P               | 260.029 | 259.022 | 261.037 | 1.648  |

<sup>1</sup>M = formula mass, H = hydrogen, M+H = formula mass + hydrogen, M-H = formula mass – hydrogen, RT = retention time.

On-line Supplementary Material

**Lauren Brink et al. Neonatal diet alters fecal microbiota and metabolome profiles over the first year of life in infants fed breast milk or formula.**

**Supplementary Table 2:** Non-parametric assessment of diet in fecal genera from infants at age three, six, nine, and 12 months of age.<sup>1</sup>

| Age | Genus                    | P-value | BF                | NLB | MF                | SF               |
|-----|--------------------------|---------|-------------------|-----|-------------------|------------------|
| 3   | SMB53                    | <0.001  | 0.015 (0, 0) a    |     | 0.057 (0, 0) a    | 0.373 (0, 1) b   |
| 3   | f__Ruminococcaceae       | <0.001  | 0.087 (0, 1) a    |     | 0.448 (0, 1) b    | 2.081 (1, 4) c   |
| 3   | Veillonella              | <0.001  | 0.175 (0, 1) a    |     | 1.72 (1, 2) b     | 4.455 (2, 14) b  |
| 3   | f__Peptostreptococcaceae | <0.001  | 0.053 (0, 0) a    |     | 0.219 (0, 1) a    | 2.225 (1, 4) b   |
| 3   | f__Clostridiaceae        | 0.002   | 0.026 (0, 0) a    |     | 0.279 (0, 1) b    | 0.672 (0, 3) b   |
| 3   | Streptococcus            | 0.003   | 0.085 (0, 1) a    |     | 0.472 (0, 1) b    | 1.17 (0, 3) b    |
| 3   | Bifidobacterium          | 0.021   | 13.791 (10, 34) a |     | 24.195 (14, 36) a | 7.919 (2, 12) b  |
| 3   | [Clostridium]            | 0.033   | 0.024 (0, 0) a    |     | 0.575 (0, 3) b    | 0.327 (0, 3) b   |
| 3   | Coprococcus              | 0.056   | 0.029 (0, 0) a    |     | 0.349 (0, 1) b    | 0.041 (0, 0) ab  |
| 3   | Parabacteroides          | 0.061   | 0.051 (0, 0) a    |     | 1.807 (0, 4) b    | 0.138 (0, 1) ab  |
| 3   | Sutterella               | 0.195   | 0.006 (0, 0) a    |     | 0.01 (0, 0) a     | 0 (0, 0) a       |
| 3   | Bacteroides              | 0.218   | 29.645 (9, 59) a  |     | 13.239 (9, 36) a  | 17.172 (1, 27) a |
| 3   | f__Lachnospiraceae       | 0.242   | 0.571 (0, 1) a    |     | 0.905 (0, 2) a    | 1.665 (1, 3) a   |
| 3   | Enterococcus             | 0.254   | 0.091 (0, 0) a    |     | 0.039 (0, 0) a    | 0.151 (0, 1) a   |
| 3   | f__Veillonellaceae       | 0.263   | 0.035 (0, 0) a    |     | 0.307 (0, 1) a    | 0.008 (0, 0) a   |
| 3   | Haemophilus              | 0.288   | 0.036 (0, 0) a    |     | 0.028 (0, 0) a    | 0.212 (0, 1) a   |
| 3   | Blautia                  | 0.305   | 0.222 (0, 1) a    |     | 0.215 (0, 0) a    | 0.725 (0, 13) a  |
| 3   | f__Bifidobacteriaceae    | 0.363   | 0.028 (0, 0) a    |     | 0.075 (0, 0) a    | 0.019 (0, 0) a   |
| 3   | [Eubacterium]            | 0.375   | 0.004 (0, 0) a    |     | 0.022 (0, 0) a    | 0.019 (0, 0) a   |
| 3   | Roseburia                | 0.38    | 0 (0, 0) a        |     | 0.019 (0, 0) a    | 0 (0, 0) a       |
| 3   | o__Clostridiales         | 0.387   | 0 (0, 0) a        |     | 0 (0, 0) a        | 0.004 (0, 0) a   |



On-line Supplementary Material

**Lauren Brink et al. Neonatal diet alters fecal microbiota and metabolome profiles over the first year of life in infants fed breast milk or formula.**

|   |                          |        |                   |  |                  |                 |
|---|--------------------------|--------|-------------------|--|------------------|-----------------|
| 3 | f__Erysipelotrichaceae   | 0.405  | 0.114 (0, 1) a    |  | 0.142 (0, 0) a   | 0.276 (0, 3) a  |
| 3 | Dorea                    | 0.412  | 0.016 (0, 0) a    |  | 0.137 (0, 0) a   | 0.069 (0, 1) a  |
| 3 | Akkermansia              | 0.444  | 0.003 (0, 0) a    |  | 0.028 (0, 0) a   | 0.022 (0, 0) a  |
| 3 | f__Enterobacteriaceae    | 0.486  | 14.906 (3, 20) a  |  | 11.14 (5, 23) a  | 7.194 (3, 17) a |
| 3 | Faecalibacterium         | 0.59   | 0.057 (0, 0) a    |  | 0.086 (0, 2) a   | 0.042 (0, 0) a  |
| 3 | f__Rikenellaceae         | 0.66   | 0.004 (0, 0) a    |  | 0 (0, 0) a       | 0 (0, 0) a      |
| 3 | Oscillospira             | 0.691  | 0.103 (0, 0) a    |  | 0.076 (0, 0) a   | 0.135 (0, 0) a  |
| 3 | Lachnospira              | 0.702  | 0.003 (0, 0) a    |  | 0 (0, 0) a       | 0 (0, 0) a      |
| 3 | [Ruminococcus]           | 0.725  | 2.198 (0, 5) a    |  | 3.631 (1, 8) a   | 3.428 (1, 10) a |
| 3 | Clostridium              | 0.769  | 0.048 (0, 2) a    |  | 0.26 (0, 2) a    | 0.09 (0, 5) a   |
| 6 | f__Peptostreptococcaceae | <0.001 | 0.033 (0, 1) a    |  | 0.285 (0, 1) a   | 2.383 (2, 3) b  |
| 6 | SMB53                    | <0.001 | 0.007 (0, 0) a    |  | 0.071 (0, 0) a   | 0.616 (0, 1) b  |
| 6 | Bifidobacterium          | <0.001 | 23.625 (15, 40) a |  | 27.52 (12, 35) a | 3.361 (0, 7) b  |
| 6 | f__Lachnospiraceae       | <0.001 | 0.115 (0, 1) a    |  | 0.901 (0, 2) b   | 4.17 (2, 7) c   |
| 6 | o__Clostridiales         | <0.001 | 0 (0, 0) a        |  | 0 (0, 0) a       | 0.226 (0, 0) b  |
| 6 | Oscillospira             | <0.001 | 0.066 (0, 0) a    |  | 0.118 (0, 0) b   | 0.391 (0, 1) c  |
| 6 | Coprococcus              | <0.001 | 0.021 (0, 0) a    |  | 0.293 (0, 1) b   | 0.481 (0, 2) b  |
| 6 | Blautia                  | <0.001 | 0.065 (0, 1) a    |  | 0.477 (0, 2) a   | 4.893 (2, 10) b |
| 6 | f__Erysipelotrichaceae   | 0.004  | 0.137 (0, 1) a    |  | 0.214 (0, 1) a   | 1.469 (1, 2) b  |
| 6 | [Ruminococcus]           | 0.005  | 0.987 (0, 3) a    |  | 2.959 (1, 6) a   | 7.584 (3, 24) b |
| 6 | f__Clostridiaceae        | 0.007  | 0.024 (0, 0) a    |  | 0.158 (0, 1) ab  | 0.571 (0, 5) b  |
| 6 | Roseburia                | 0.013  | 0 (0, 0) a        |  | 0 (0, 0) a       | 0.088 (0, 2) b  |
| 6 | Enterococcus             | 0.017  | 0.044 (0, 0) a    |  | 0.04 (0, 0) a    | 0 (0, 0) b      |

On-line Supplementary Material

**Lauren Brink et al. Neonatal diet alters fecal microbiota and metabolome profiles over the first year of life in infants fed breast milk or formula.**

|   |                          |        |                   |  |                   |                  |
|---|--------------------------|--------|-------------------|--|-------------------|------------------|
| 6 | f__Ruminococcaceae       | 0.019  | 0.436 (0, 1) a    |  | 0.657 (0, 1) b    | 0.9 (0, 2) b     |
| 6 | [Clostridium]            | 0.049  | 0.051 (0, 0) a    |  | 0.41 (0, 1) ab    | 0.299 (0, 1) b   |
| 6 | [Eubacterium]            | 0.105  | 0.006 (0, 0) a    |  | 0.078 (0, 1) a    | 0.118 (0, 0) a   |
| 6 | f__Bifidobacteriaceae    | 0.106  | 0.014 (0, 0) a    |  | 0.041 (0, 0) a    | 0.009 (0, 0) a   |
| 6 | Dorea                    | 0.136  | 0.041 (0, 0) a    |  | 0.064 (0, 0) a    | 0.363 (0, 2) a   |
| 6 | f__Enterobacteriaceae    | 0.211  | 7.038 (5, 13) a   |  | 5.521 (3, 8) a    | 3.376 (1, 11) a  |
| 6 | Veillonella              | 0.39   | 1.984 (0, 7) a    |  | 1.518 (0, 5) a    | 0.886 (0, 1) a   |
| 6 | f__Rikenellaceae         | 0.417  | 0 (0, 0) a        |  | 0 (0, 0) a        | 0 (0, 0) a       |
| 6 | Akkermansia              | 0.477  | 0.007 (0, 0) a    |  | 0.022 (0, 0) a    | 0 (0, 0) a       |
| 6 | Clostridium              | 0.529  | 0.085 (0, 1) a    |  | 0.172 (0, 1) a    | 0.016 (0, 1) a   |
| 6 | Faecalibacterium         | 0.533  | 0.067 (0, 0) a    |  | 0.392 (0, 3) a    | 0.132 (0, 6) a   |
| 6 | Bacteroides              | 0.554  | 29.429 (11, 52) a |  | 29.711 (13, 44) a | 20.299 (1, 44) a |
| 6 | Sutterella               | 0.652  | 0 (0, 0) a        |  | 0 (0, 0) a        | 0 (0, 0) a       |
| 6 | Lachnospira              | 0.715  | 0 (0, 0) a        |  | 0 (0, 0) a        | 0 (0, 0) a       |
| 6 | Streptococcus            | 0.726  | 0.141 (0, 1) a    |  | 0.293 (0, 1) a    | 0.29 (0, 1) a    |
| 6 | f__Veillonellaceae       | 0.726  | 0.065 (0, 7) a    |  | 0.232 (0, 5) a    | 0.055 (0, 1) a   |
| 6 | Haemophilus              | 0.924  | 0.024 (0, 0) a    |  | 0.092 (0, 0) a    | 0.032 (0, 1) a   |
| 6 | Parabacteroides          | 0.949  | 0.03 (0, 3) a     |  | 0.358 (0, 3) a    | 0.026 (0, 1) a   |
| 9 | o__Clostridiales         | <0.001 | 0 (0, 0) a        |  | 0 (0, 0) a        | 0.228 (0, 0) b   |
| 9 | SMB53                    | <0.001 | 0 (0, 0) a        |  | 0.076 (0, 0) a    | 1.227 (1, 2) b   |
| 9 | Blautia                  | <0.001 | 0.061 (0, 1) a    |  | 0.146 (0, 1) a    | 5.076 (3, 10) b  |
| 9 | f__Peptostreptococcaceae | 0.005  | 0.064 (0, 1) a    |  | 0.282 (0, 1) a    | 2.447 (1, 7) b   |
| 9 | f__Lachnospiraceae       | 0.007  | 0.512 (0, 1) a    |  | 3.021 (2, 6) b    | 3.488 (2, 8) b   |

On-line Supplementary Material

**Lauren Brink et al. Neonatal diet alters fecal microbiota and metabolome profiles over the first year of life in infants fed breast milk or formula.**

|   |                       |       |                   |  |                   |                  |
|---|-----------------------|-------|-------------------|--|-------------------|------------------|
| 9 | f__Veillonellaceae    | 0.01  | 0.027 (0, 2) a    |  | 7.207 (1, 18) b   | 0 (0, 0) a       |
| 9 | Dorea                 | 0.019 | 0.019 (0, 0) a    |  | 0.014 (0, 0) a    | 0.73 (0, 1) b    |
| 9 | Clostridium           | 0.026 | 1.096 (0, 4) a    |  | 0.047 (0, 0) b    | 0.032 (0, 0) b   |
| 9 | Akkermansia           | 0.038 | 0 (0, 0) a        |  | 0.017 (0, 0) b    | 0.107 (0, 2) b   |
| 9 | Bifidobacterium       | 0.038 | 17.951 (11, 38) a |  | 11.847 (10, 31) a | 6.065 (3, 17) b  |
| 9 | Lachnospira           | 0.054 | 0 (0, 0) a        |  | 0 (0, 1) a        | 0.368 (0, 5) b   |
| 9 | Enterococcus          | 0.099 | 0.028 (0, 0) a    |  | 0.014 (0, 0) ab   | 0 (0, 0) b       |
| 9 | Parabacteroides       | 0.127 | 0.004 (0, 0) a    |  | 0.082 (0, 4) a    | 0.535 (0, 2) a   |
| 9 | Roseburia             | 0.132 | 0.006 (0, 0) a    |  | 0 (0, 0) a        | 0.016 (0, 1) a   |
| 9 | Oscillospira          | 0.14  | 0.075 (0, 0) a    |  | 0.153 (0, 0) a    | 0.495 (0, 1) a   |
| 9 | Veillonella           | 0.188 | 2.556 (1, 8) a    |  | 0.52 (0, 2) a     | 0.207 (0, 2) a   |
| 9 | Coprococcus           | 0.222 | 0.283 (0, 1) a    |  | 0.226 (0, 1) a    | 0.412 (0, 2) a   |
| 9 | f__Clostridiaceae     | 0.237 | 0.1 (0, 0) a      |  | 0.119 (0, 2) a    | 0.259 (0, 1) a   |
| 9 | [Clostridium]         | 0.243 | 0.432 (0, 2) a    |  | 0.087 (0, 0) a    | 0.09 (0, 0) a    |
| 9 | f__Bifidobacteriaceae | 0.287 | 0.039 (0, 0) a    |  | 0.136 (0, 0) a    | 0.025 (0, 0) a   |
| 9 | [Ruminococcus]        | 0.303 | 1.468 (0, 4) a    |  | 1.303 (1, 4) a    | 2.693 (2, 4) a   |
| 9 | f__Enterobacteriaceae | 0.31  | 2.891 (1, 24) a   |  | 1.705 (1, 4) a    | 1.854 (1, 3) a   |
| 9 | [Eubacterium]         | 0.342 | 0.034 (0, 0) a    |  | 0.007 (0, 0) a    | 0.064 (0, 0) a   |
| 9 | Faecalibacterium      | 0.429 | 0.023 (0, 2) a    |  | 6.68 (0, 13) a    | 0.071 (0, 7) a   |
| 9 | Bacteroides           | 0.501 | 19.803 (0, 44) a  |  | 18.571 (8, 44) a  | 35.402 (9, 49) a |
| 9 | Streptococcus         | 0.524 | 0.064 (0, 0) a    |  | 0.106 (0, 1) a    | 0.183 (0, 1) a   |
| 9 | Sutterella            | 0.79  | 0 (0, 0) a        |  | 0 (0, 0) a        | 0.005 (0, 0) a   |
| 9 | Haemophilus           | 0.846 | 0.213 (0, 2) a    |  | 0.489 (0, 1) a    | 0.168 (0, 1) a   |

On-line Supplementary Material

**Lauren Brink et al. Neonatal diet alters fecal microbiota and metabolome profiles over the first year of life in infants fed breast milk or formula.**

|    |                          |        |                   |                  |                 |                 |
|----|--------------------------|--------|-------------------|------------------|-----------------|-----------------|
| 9  | f__Ruminococcaceae       | 0.877  | 0.875 (1, 3) a    |                  | 1.164 (1, 1) a  | 1.056 (0, 3) a  |
| 9  | f__Rikenellaceae         | 0.971  | 0.003 (0, 0) a    |                  | 0.012 (0, 0) a  | 0.004 (0, 0) a  |
| 9  | f__Erysipelotrichaceae   | 0.989  | 0.252 (0, 0) a    |                  | 0.169 (0, 0) a  | 0.165 (0, 0) a  |
| 12 | o__Clostridiales         | <0.001 | 0.005 (0, 0) a    | 0.018 (0, 0) a   | 0.015 (0, 0) a  | 0.218 (0, 0) b  |
| 12 | Blautia                  | 0.004  | 0.481 (0, 3) a    | 1.906 (0, 4) ab  | 0.969 (0, 3) a  | 4.819 (2, 7) b  |
| 12 | Bifidobacterium          | 0.008  | 14.202 (13, 19) a | 8.631 (4, 12) ab | 15.18 (6, 23) a | 4.604 (2, 6) b  |
| 12 | f__Lachnospiraceae       | 0.012  | 1.267 (1, 2) a    | 1.473 (1, 3) ab  | 2.894 (2, 5) bc | 3.836 (2, 6) c  |
| 12 | Veillonella              | 0.047  | 0.836 (0, 4) a    | 0.415 (0, 1) ab  | 0.36 (0, 1) ab  | 0.25 (0, 0) b   |
| 12 | Dorea                    | 0.056  | 0.233 (0, 1) ab   | 0.933 (0, 2) b   | 0.153 (0, 0) a  | 0.496 (0, 1) ab |
| 12 | f__Erysipelotrichaceae   | 0.143  | 0.22 (0, 1) a     | 0.358 (0, 3) a   | 0.187 (0, 1) a  | 0.174 (0, 0) a  |
| 12 | Parabacteroides          | 0.153  | 0.022 (0, 1) a    | 0.091 (0, 11) a  | 0.857 (0, 5) a  | 4.118 (0, 8) a  |
| 12 | [Clostridium]            | 0.174  | 0.223 (0, 1) a    | 0.188 (0, 1) a   | 0.019 (0, 0) a  | 0.026 (0, 0) a  |
| 12 | Akkermansia              | 0.192  | 0 (0, 0) a        | 0.036 (0, 2) a   | 0.007 (0, 0) a  | 0.143 (0, 1) a  |
| 12 | f__Peptostreptococcaceae | 0.225  | 0.608 (0, 2) a    | 0.821 (0, 1) a   | 0.643 (0, 1) a  | 2.025 (0, 3) a  |
| 12 | f__Clostridiaceae        | 0.259  | 0.056 (0, 1) a    | 0.115 (0, 1) a   | 0.066 (0, 0) a  | 0.845 (0, 2) a  |
| 12 | Roseburia                | 0.275  | 0.057 (0, 0) a    | 0 (0, 0) a       | 0.009 (0, 0) a  | 0.092 (0, 1) a  |
| 12 | Clostridium              | 0.295  | 0.281 (0, 1) a    | 0.05 (0, 0) a    | 0.018 (0, 0) a  | 0.009 (0, 0) a  |
| 12 | Faecalibacterium         | 0.391  | 0.234 (0, 15) a   | 6.724 (3, 17) a  | 2.669 (0, 4) a  | 1.942 (0, 8) a  |
| 12 | Enterococcus             | 0.395  | 0.017 (0, 0) a    | 0 (0, 0) a       | 0 (0, 0) a      | 0.018 (0, 0) a  |
| 12 | [Eubacterium]            | 0.4    | 0.038 (0, 0) a    | 0.134 (0, 0) a   | 0.042 (0, 0) a  | 0.07 (0, 0) a   |
| 12 | f__Enterobacteriaceae    | 0.51   | 2.863 (1, 6) a    | 1.358 (1, 2) a   | 0.971 (0, 4) a  | 2.076 (0, 7) a  |
| 12 | [Ruminococcus]           | 0.574  | 2.749 (1, 4) a    | 2.842 (2, 10) a  | 1.285 (1, 4) a  | 2.322 (1, 3) a  |
| 12 | Haemophilus              | 0.577  | 0.622 (0, 1) a    | 0.163 (0, 1) a   | 0.186 (0, 1) a  | 0.081 (0, 1) a  |
| 12 | Lachnospira              | 0.599  | 0.033 (0, 0) a    | 0.003 (0, 0) a   | 0.009 (0, 0) a  | 0.032 (0, 1) a  |
| 12 | SMB53                    | 0.649  | 0.137 (0, 0) a    | 0.163 (0, 1) a   | 0.12 (0, 0) a   | 0.348 (0, 1) a  |

On-line Supplementary Material

**Lauren Brink et al. Neonatal diet alters fecal microbiota and metabolome profiles over the first year of life in infants fed breast milk or formula.**

|    |                       |       |                   |                   |                   |                  |
|----|-----------------------|-------|-------------------|-------------------|-------------------|------------------|
| 12 | f__Bifidobacteriaceae | 0.697 | 0 (0, 0) a        | 0.015 (0, 0) a    | 0.032 (0, 0) a    | 0.008 (0, 0) a   |
| 12 | Bacteroides           | 0.709 | 39.689 (12, 55) a | 44.608 (35, 56) a | 48.214 (32, 59) a | 45.92 (35, 56) a |
| 12 | f__Ruminococcaceae    | 0.74  | 0.945 (1, 2) a    | 1.217 (1, 3) a    | 0.51 (0, 3) a     | 1.434 (0, 6) a   |
| 12 | f__Rikenellaceae      | 0.805 | 0 (0, 0) a        | 0.005 (0, 0) a    | 0.019 (0, 1) a    | 0.013 (0, 0) a   |
| 12 | Oscillospira          | 0.892 | 0.144 (0, 1) a    | 0.179 (0, 1) a    | 0.14 (0, 0) a     | 0.211 (0, 0) a   |
| 12 | Streptococcus         | 0.931 | 0.279 (0, 1) a    | 0.377 (0, 1) a    | 0.184 (0, 1) a    | 0.267 (0, 1) a   |
| 12 | f__Veillonellaceae    | 0.984 | 0.091 (0, 10) a   | 0.339 (0, 3) a    | 0.176 (0, 3) a    | 0.149 (0, 0) a   |
| 12 | Sutterella            | 0.988 | 0.008 (0, 1) a    | 0.011 (0, 1) a    | 0 (0, 1) a        | 0.009 (0, 1) a   |
| 12 | Coprococcus           | 1     | 0.47 (0, 1) a     | 0.398 (0, 1) a    | 0.249 (0, 2) a    | 0.418 (0, 2) a   |

<sup>1</sup> Data are presented as median (25<sup>th</sup> quartile, 75<sup>th</sup> quartile). Differences in diet were assessed by Kruskal-Wallis test on percent abundances. Post-hoc analysis of pairwise differences in diet were assessed by Dunn's test. Medians without a common letter are statistically significant. Sample size range from 10 to 20 per diet group at three, six, nine and 12 months of age. BF = Breast-fed, MF = milk formula fed, NLB = no longer breastfeeding, SF = soy formula fed.

On-line Supplementary Material

**Lauren Brink et al. Neonatal diet alters fecal microbiota and metabolome profiles over the first year of life in infants fed breast milk or formula.**

**Supplementary Table 3: Dietary pairwise comparison of genera in infants at three, six, nine, and 12 months of age.<sup>1</sup>**

| Genus           | Base Mean | Log2 Fold Change | Log2 Fold Change SE | Stat   | P-value | FDR   | Comparison | Age |
|-----------------|-----------|------------------|---------------------|--------|---------|-------|------------|-----|
| [Clostridium]   | 173.400   | -1.400           | 1.200               | -1.200 | 0.234   | 0.234 | BF vs MF   | 3   |
| [Clostridium]   | 173.400   | -0.700           | 1.100               | -0.700 | 0.507   | 0.507 | BF vs SF   | 3   |
| [Clostridium]   | 173.400   | 0.700            | 1.200               | 0.600  | 0.548   | 0.548 | MF vs SF   | 3   |
| [Eubacterium]   | 3.900     | -2.700           | 1.200               | -2.300 | 0.024   | 0.024 | BF vs MF   | 3   |
| [Eubacterium]   | 3.900     | -0.400           | 1.100               | -0.300 | 0.744   | 0.744 | BF vs SF   | 3   |
| [Eubacterium]   | 3.900     | 2.400            | 1.200               | 2.000  | 0.041   | 0.041 | MF vs SF   | 3   |
| [Ruminococcus]  | 782.200   | 0.000            | 0.900               | 0.000  | 0.965   | 0.965 | BF vs MF   | 3   |
| [Ruminococcus]  | 782.200   | 0.900            | 0.800               | 1.200  | 0.242   | 0.242 | BF vs SF   | 3   |
| [Ruminococcus]  | 782.200   | 0.900            | 0.900               | 1.000  | 0.313   | 0.313 | MF vs SF   | 3   |
| Akkermansia     | 17.900    | -0.200           | 1.400               | -0.100 | 1       | 1     | BF vs MF   | 3   |
| Akkermansia     | 17.900    | 0.800            | 1.200               | 0.600  | 1       | 1     | BF vs SF   | 3   |
| Akkermansia     | 17.900    | 0.900            | 1.400               | 0.700  | 1       | 1     | MF vs SF   | 3   |
| Bacteroides     | 4668.900  | 1.800            | 0.900               | 2.000  | 0.045   | 0.045 | BF vs MF   | 3   |
| Bacteroides     | 4668.900  | 2.600            | 0.800               | 3.300  | <0.01   | <0.01 | BF vs SF   | 3   |
| Bacteroides     | 4668.900  | 0.900            | 0.900               | 1.000  | 0.332   | 0.332 | MF vs SF   | 3   |
| Bifidobacterium | 2220.500  | 0.600            | 0.600               | 1.000  | 0.317   | 0.317 | BF vs MF   | 3   |
| Bifidobacterium | 2220.500  | 2.800            | 0.500               | 5.200  | <0.01   | <0.01 | BF vs SF   | 3   |
| Bifidobacterium | 2220.500  | 2.200            | 0.600               | 3.600  | <0.01   | <0.01 | MF vs SF   | 3   |
| Blautia         | 170.100   | 0.600            | 1.100               | 0.500  | 0.608   | 0.608 | BF vs MF   | 3   |
| Blautia         | 170.100   | -1.800           | 1.000               | -1.700 | 0.084   | 0.084 | BF vs SF   | 3   |
| Blautia         | 170.100   | -2.400           | 1.100               | -2.100 | 0.038   | 0.038 | MF vs SF   | 3   |
| Clostridium     | 498.800   | 2.300            | 1.600               | 1.500  | 1       | 1     | BF vs MF   | 3   |
| Clostridium     | 498.800   | 3.300            | 1.400               | 2.400  | 1       | 1     | BF vs SF   | 3   |
| Clostridium     | 498.800   | 1.000            | 1.500               | 0.600  | 1       | 1     | MF vs SF   | 3   |
| Coprococcus     | 57.700    | -2.200           | 1.100               | -2.100 | 0.04    | 0.04  | BF vs MF   | 3   |
| Coprococcus     | 57.700    | -0.100           | 0.900               | -0.100 | 0.957   | 0.957 | BF vs SF   | 3   |
| Coprococcus     | 57.700    | 2.100            | 1.000               | 2.000  | 0.043   | 0.043 | MF vs SF   | 3   |

On-line Supplementary Material

**Lauren Brink et al. Neonatal diet alters fecal microbiota and metabolome profiles over the first year of life in infants fed breast milk or formula.**

|                          |          |        |       |        |       |       |          |   |
|--------------------------|----------|--------|-------|--------|-------|-------|----------|---|
| Dorea                    | 24.000   | -1.400 | 1.200 | -1.100 | 0.263 | 0.263 | BF vs MF | 3 |
| Dorea                    | 24.000   | -1.700 | 1.100 | -1.600 | 0.119 | 0.119 | BF vs SF | 3 |
| Dorea                    | 24.000   | -0.300 | 1.200 | -0.300 | 0.781 | 0.781 | MF vs SF | 3 |
| Enterococcus             | 69.800   | 5.000  | 1.100 | 4.500  | <0.01 | <0.01 | BF vs MF | 3 |
| Enterococcus             | 69.800   | 2.200  | 1.000 | 2.300  | 0.023 | 0.023 | BF vs SF | 3 |
| Enterococcus             | 69.800   | -2.800 | 1.100 | -2.500 | 0.012 | 0.012 | MF vs SF | 3 |
| f__Bifidobacteriaceae    | 11.500   | -1.100 | 1.100 | -1.000 | 0.334 | 0.334 | BF vs MF | 3 |
| f__Bifidobacteriaceae    | 11.500   | 1.300  | 1.000 | 1.300  | 0.196 | 0.196 | BF vs SF | 3 |
| f__Bifidobacteriaceae    | 11.500   | 2.300  | 1.100 | 2.100  | 0.032 | 0.032 | MF vs SF | 3 |
| f__Clostridiaceae        | 59.200   | -2.100 | 1.000 | -2.100 | 0.036 | 0.036 | BF vs MF | 3 |
| f__Clostridiaceae        | 59.200   | -3.100 | 0.900 | -3.600 | <0.01 | <0.01 | BF vs SF | 3 |
| f__Clostridiaceae        | 59.200   | -1.100 | 1.000 | -1.100 | 0.266 | 0.266 | MF vs SF | 3 |
| f__Enterobacteriaceae    | 2411.700 | 2.100  | 0.700 | 3.200  | <0.01 | <0.01 | BF vs MF | 3 |
| f__Enterobacteriaceae    | 2411.700 | 3.000  | 0.600 | 5.000  | <0.01 | <0.01 | BF vs SF | 3 |
| f__Enterobacteriaceae    | 2411.700 | 0.900  | 0.700 | 1.300  | 0.195 | 0.195 | MF vs SF | 3 |
| f__Erysipelotrichaceae   | 182.400  | 2.900  | 1.200 | 2.400  | 0.016 | 0.016 | BF vs MF | 3 |
| f__Erysipelotrichaceae   | 182.400  | 0.700  | 1.100 | 0.700  | 0.493 | 0.493 | BF vs SF | 3 |
| f__Erysipelotrichaceae   | 182.400  | -2.100 | 1.200 | -1.800 | 0.072 | 0.072 | MF vs SF | 3 |
| f__Lachnospiraceae       | 122.600  | -0.400 | 0.700 | -0.600 | 0.539 | 0.539 | BF vs MF | 3 |
| f__Lachnospiraceae       | 122.600  | 0.100  | 0.600 | 0.100  | 0.891 | 0.891 | BF vs SF | 3 |
| f__Lachnospiraceae       | 122.600  | 0.500  | 0.700 | 0.700  | 0.457 | 0.457 | MF vs SF | 3 |
| f__Peptostreptococcaceae | 143.000  | -3.500 | 1.000 | -3.500 | <0.01 | <0.01 | BF vs MF | 3 |
| f__Peptostreptococcaceae | 143.000  | -4.500 | 0.900 | -5.200 | <0.01 | <0.01 | BF vs SF | 3 |
| f__Peptostreptococcaceae | 143.000  | -1.100 | 1.000 | -1.100 | 0.26  | 0.26  | MF vs SF | 3 |
| f__Rikenellaceae         | 32.500   | 1.000  | 1.900 | 0.500  | 0.612 | 0.612 | BF vs MF | 3 |
| f__Rikenellaceae         | 32.500   | -1.600 | 1.700 | -0.900 | 0.347 | 0.347 | BF vs SF | 3 |
| f__Rikenellaceae         | 32.500   | -2.500 | 1.900 | -1.400 | 0.175 | 0.175 | MF vs SF | 3 |
| f__Ruminococcaceae       | 120.100  | -0.700 | 0.700 | -0.900 | 0.352 | 0.352 | BF vs MF | 3 |

On-line Supplementary Material

**Lauren Brink et al. Neonatal diet alters fecal microbiota and metabolome profiles over the first year of life in infants fed breast milk or formula.**

|                    |         |        |       |        |       |       |          |   |
|--------------------|---------|--------|-------|--------|-------|-------|----------|---|
| f__Ruminococcaceae | 120.100 | -1.700 | 0.600 | -2.700 | <0.01 | <0.01 | BF vs SF | 3 |
| f__Ruminococcaceae | 120.100 | -1.100 | 0.700 | -1.500 | 0.139 | 0.139 | MF vs SF | 3 |
| f__Veillonellaceae | 166.700 | -0.600 | 1.400 | -0.400 | 1     | 1     | BF vs MF | 3 |
| f__Veillonellaceae | 166.700 | 2.800  | 1.200 | 2.300  | 1     | 1     | BF vs SF | 3 |
| f__Veillonellaceae | 166.700 | 3.500  | 1.400 | 2.500  | 1     | 1     | MF vs SF | 3 |
| Faecalibacterium   | 142.500 | -1.600 | 1.300 | -1.200 | 0.228 | 0.228 | BF vs MF | 3 |
| Faecalibacterium   | 142.500 | 0.500  | 1.200 | 0.400  | 0.664 | 0.664 | BF vs SF | 3 |
| Faecalibacterium   | 142.500 | 2.100  | 1.300 | 1.600  | 0.109 | 0.109 | MF vs SF | 3 |
| Haemophilus        | 93.400  | 3.400  | 1.400 | 2.500  | 0.012 | 0.012 | BF vs MF | 3 |
| Haemophilus        | 93.400  | -0.200 | 1.200 | -0.200 | 0.838 | 0.838 | BF vs SF | 3 |
| Haemophilus        | 93.400  | -3.700 | 1.300 | -2.700 | <0.01 | <0.01 | MF vs SF | 3 |
| Lachnospira        | 24.600  | -1.900 | 1.700 | -1.100 | 0.266 | 0.266 | BF vs MF | 3 |
| Lachnospira        | 24.600  | -3.400 | 1.500 | -2.200 | 0.026 | 0.026 | BF vs SF | 3 |
| Lachnospira        | 24.600  | -1.500 | 1.700 | -0.900 | 0.379 | 0.379 | MF vs SF | 3 |
| o__Clostridiales   | 5.100   | 0.300  | 1.500 | 0.200  | 0.847 | 0.847 | BF vs MF | 3 |
| o__Clostridiales   | 5.100   | -2.100 | 1.300 | -1.600 | 0.113 | 0.113 | BF vs SF | 3 |
| o__Clostridiales   | 5.100   | -2.400 | 1.500 | -1.600 | 0.102 | 0.102 | MF vs SF | 3 |
| Oscillospira       | 23.900  | -0.100 | 0.900 | -0.200 | 0.875 | 0.875 | BF vs MF | 3 |
| Oscillospira       | 23.900  | 0.800  | 0.800 | 1.000  | 0.317 | 0.317 | BF vs SF | 3 |
| Oscillospira       | 23.900  | 1.000  | 0.900 | 1.100  | 0.288 | 0.288 | MF vs SF | 3 |
| Parabacteroides    | 365.300 | -4.900 | 1.200 | -4.200 | <0.01 | <0.01 | BF vs MF | 3 |
| Parabacteroides    | 365.300 | -0.400 | 1.100 | -0.400 | 0.679 | 0.679 | BF vs SF | 3 |
| Parabacteroides    | 365.300 | 4.500  | 1.200 | 3.800  | <0.01 | <0.01 | MF vs SF | 3 |
| Roseburia          | 4.400   | 1.100  | 1.400 | 0.800  | 0.426 | 0.426 | BF vs MF | 3 |
| Roseburia          | 4.400   | 2.200  | 1.200 | 1.800  | 0.066 | 0.066 | BF vs SF | 3 |
| Roseburia          | 4.400   | 1.200  | 1.400 | 0.900  | 0.393 | 0.393 | MF vs SF | 3 |
| SMB53              | 21.000  | -2.200 | 0.800 | -2.600 | 0.01  | 0.01  | BF vs MF | 3 |
| SMB53              | 21.000  | -3.700 | 0.700 | -4.900 | <0.01 | <0.01 | BF vs SF | 3 |
| SMB53              | 21.000  | -1.500 | 0.800 | -1.900 | 0.064 | 0.064 | MF vs SF | 3 |



On-line Supplementary Material

**Lauren Brink et al. Neonatal diet alters fecal microbiota and metabolome profiles over the first year of life in infants fed breast milk or formula.**

|                 |          |        |       |        |       |       |          |   |
|-----------------|----------|--------|-------|--------|-------|-------|----------|---|
| Streptococcus   | 143.700  | 0.800  | 0.800 | 1.000  | 0.333 | 0.333 | BF vs MF | 3 |
| Streptococcus   | 143.700  | -1.100 | 0.700 | -1.500 | 0.124 | 0.124 | BF vs SF | 3 |
| Streptococcus   | 143.700  | -1.900 | 0.800 | -2.400 | 0.018 | 0.018 | MF vs SF | 3 |
| Sutterella      | 14.500   | 0.900  | 1.600 | 0.600  | 0.578 | 0.578 | BF vs MF | 3 |
| Sutterella      | 14.500   | 0.500  | 1.400 | 0.300  | 0.741 | 0.741 | BF vs SF | 3 |
| Sutterella      | 14.500   | -0.400 | 1.600 | -0.300 | 0.79  | 0.79  | MF vs SF | 3 |
| Veillonella     | 409.600  | 0.300  | 0.900 | 0.400  | 0.719 | 0.719 | BF vs MF | 3 |
| Veillonella     | 409.600  | -1.100 | 0.800 | -1.400 | 0.164 | 0.164 | BF vs SF | 3 |
| Veillonella     | 409.600  | -1.400 | 0.900 | -1.600 | 0.106 | 0.106 | MF vs SF | 3 |
| [Clostridium]   | 67.200   | -1.900 | 0.800 | -2.400 | 0.017 | 0.017 | BF vs MF | 6 |
| [Clostridium]   | 67.200   | -1.100 | 0.800 | -1.300 | 0.201 | 0.201 | BF vs SF | 6 |
| [Clostridium]   | 67.200   | 0.800  | 0.800 | 0.900  | 0.345 | 0.345 | MF vs SF | 6 |
| [Eubacterium]   | 57.200   | -3.300 | 1.000 | -3.200 | <0.01 | <0.01 | BF vs MF | 6 |
| [Eubacterium]   | 57.200   | -1.200 | 1.100 | -1.100 | 0.288 | 0.288 | BF vs SF | 6 |
| [Eubacterium]   | 57.200   | 2.100  | 1.100 | 1.900  | 0.056 | 0.056 | MF vs SF | 6 |
| [Ruminococcus]  | 754.200  | 0.000  | 0.700 | 0.000  | 0.998 | 0.998 | BF vs MF | 6 |
| [Ruminococcus]  | 754.200  | 0.300  | 0.700 | 0.400  | 0.708 | 0.708 | BF vs SF | 6 |
| [Ruminococcus]  | 754.200  | 0.300  | 0.700 | 0.400  | 0.709 | 0.709 | MF vs SF | 6 |
| Akkermansia     | 30.400   | -4.000 | 1.200 | -3.400 | <0.01 | <0.01 | BF vs MF | 6 |
| Akkermansia     | 30.400   | 0.400  | 1.300 | 0.300  | 0.745 | 0.745 | BF vs SF | 6 |
| Akkermansia     | 30.400   | 4.400  | 1.300 | 3.500  | <0.01 | <0.01 | MF vs SF | 6 |
| Bacteroides     | 6063.500 | 0.200  | 0.700 | 0.200  | 0.817 | 0.817 | BF vs MF | 6 |
| Bacteroides     | 6063.500 | 1.400  | 0.800 | 1.800  | 0.069 | 0.069 | BF vs SF | 6 |
| Bacteroides     | 6063.500 | 1.200  | 0.800 | 1.600  | 0.108 | 0.108 | MF vs SF | 6 |
| Bifidobacterium | 3587.600 | 1.300  | 0.500 | 2.400  | 0.016 | 0.016 | BF vs MF | 6 |
| Bifidobacterium | 3587.600 | 4.400  | 0.600 | 8.000  | <0.01 | <0.01 | BF vs SF | 6 |
| Bifidobacterium | 3587.600 | 3.200  | 0.600 | 5.700  | <0.01 | <0.01 | MF vs SF | 6 |
| Blautia         | 195.800  | 0.500  | 0.900 | 0.600  | 0.564 | 0.564 | BF vs MF | 6 |
| Blautia         | 195.800  | -1.400 | 0.900 | -1.600 | 0.12  | 0.12  | BF vs SF | 6 |
| Blautia         | 195.800  | -1.900 | 0.900 | -2.100 | 0.036 | 0.036 | MF vs SF | 6 |

On-line Supplementary Material

**Lauren Brink et al. Neonatal diet alters fecal microbiota and metabolome profiles over the first year of life in infants fed breast milk or formula.**

|                          |          |        |       |        |       |       |          |   |
|--------------------------|----------|--------|-------|--------|-------|-------|----------|---|
| Clostridium              | 105.600  | 1.900  | 0.900 | 2.000  | 0.051 | 0.051 | BF vs MF | 6 |
| Clostridium              | 105.600  | 1.200  | 1.000 | 1.200  | 0.25  | 0.25  | BF vs SF | 6 |
| Clostridium              | 105.600  | -0.700 | 1.000 | -0.700 | 0.509 | 0.509 | MF vs SF | 6 |
| Coprococcus              | 72.900   | -3.900 | 0.800 | -5.200 | <0.01 | <0.01 | BF vs MF | 6 |
| Coprococcus              | 72.900   | -3.600 | 0.800 | -4.500 | <0.01 | <0.01 | BF vs SF | 6 |
| Coprococcus              | 72.900   | 0.300  | 0.800 | 0.300  | 0.741 | 0.741 | MF vs SF | 6 |
| Dorea                    | 34.200   | 0.900  | 0.800 | 1.100  | 0.272 | 0.272 | BF vs MF | 6 |
| Dorea                    | 34.200   | -0.400 | 0.900 | -0.500 | 0.601 | 0.601 | BF vs SF | 6 |
| Dorea                    | 34.200   | -1.300 | 0.800 | -1.500 | 0.122 | 0.122 | MF vs SF | 6 |
| Enterococcus             | 37.500   | 1.400  | 1.000 | 1.400  | 0.15  | 0.15  | BF vs MF | 6 |
| Enterococcus             | 37.500   | 5.700  | 1.100 | 5.300  | <0.01 | <0.01 | BF vs SF | 6 |
| Enterococcus             | 37.500   | 4.300  | 1.100 | 4.000  | <0.01 | <0.01 | MF vs SF | 6 |
| f__Bifidobacteriaceae    | 13.100   | -0.500 | 0.900 | -0.600 | 0.53  | 0.53  | BF vs MF | 6 |
| f__Bifidobacteriaceae    | 13.100   | 3.000  | 1.000 | 3.100  | <0.01 | <0.01 | BF vs SF | 6 |
| f__Bifidobacteriaceae    | 13.100   | 3.500  | 1.000 | 3.700  | <0.01 | <0.01 | MF vs SF | 6 |
| f__Clostridiaceae        | 93.700   | -1.000 | 0.900 | -1.200 | 0.236 | 0.236 | BF vs MF | 6 |
| f__Clostridiaceae        | 93.700   | -2.700 | 0.900 | -2.900 | <0.01 | <0.01 | BF vs SF | 6 |
| f__Clostridiaceae        | 93.700   | -1.700 | 0.900 | -1.800 | 0.075 | 0.075 | MF vs SF | 6 |
| f__Enterobacteriaceae    | 2226.100 | 0.600  | 0.600 | 1.000  | 0.335 | 0.335 | BF vs MF | 6 |
| f__Enterobacteriaceae    | 2226.100 | 3.000  | 0.700 | 4.300  | <0.01 | <0.01 | BF vs SF | 6 |
| f__Enterobacteriaceae    | 2226.100 | 2.400  | 0.700 | 3.400  | <0.01 | <0.01 | MF vs SF | 6 |
| f__Erysipelotrichaceae   | 90.900   | 0.100  | 0.700 | 0.200  | 0.844 | 0.844 | BF vs MF | 6 |
| f__Erysipelotrichaceae   | 90.900   | -0.000 | 0.700 | -0.000 | 0.975 | 0.975 | BF vs SF | 6 |
| f__Erysipelotrichaceae   | 90.900   | -0.200 | 0.700 | -0.200 | 0.83  | 0.83  | MF vs SF | 6 |
| f__Lachnospiraceae       | 213.400  | -0.300 | 0.600 | -0.500 | 0.628 | 0.628 | BF vs MF | 6 |
| f__Lachnospiraceae       | 213.400  | -1.600 | 0.700 | -2.400 | 0.019 | 0.019 | BF vs SF | 6 |
| f__Lachnospiraceae       | 213.400  | -1.300 | 0.700 | -1.900 | 0.056 | 0.056 | MF vs SF | 6 |
| f__Peptostreptococcaceae | 84.800   | 0.500  | 0.700 | 0.700  | 0.456 | 0.456 | BF vs MF | 6 |

On-line Supplementary Material

**Lauren Brink et al. Neonatal diet alters fecal microbiota and metabolome profiles over the first year of life in infants fed breast milk or formula.**

|                          |         |        |       |        |       |       |          |   |
|--------------------------|---------|--------|-------|--------|-------|-------|----------|---|
| f__Peptostreptococcaceae | 84.800  | -1.100 | 0.700 | -1.600 | 0.116 | 0.116 | BF vs SF | 6 |
| f__Peptostreptococcaceae | 84.800  | -1.600 | 0.700 | -2.300 | 0.023 | 0.023 | MF vs SF | 6 |
| f__Rikenellaceae         | 4.300   | -1.100 | 2.200 | -0.500 | 0.627 | 0.627 | BF vs MF | 6 |
| f__Rikenellaceae         | 4.300   | 4.900  | 2.500 | 2.000  | 0.049 | 0.049 | BF vs SF | 6 |
| f__Rikenellaceae         | 4.300   | 6.000  | 2.500 | 2.400  | 0.016 | 0.016 | MF vs SF | 6 |
| f__Ruminococcaceae       | 130.700 | -0.500 | 0.600 | -0.800 | 0.406 | 0.406 | BF vs MF | 6 |
| f__Ruminococcaceae       | 130.700 | -0.600 | 0.700 | -0.900 | 0.367 | 0.367 | BF vs SF | 6 |
| f__Ruminococcaceae       | 130.700 | -0.100 | 0.700 | -0.100 | 0.895 | 0.895 | MF vs SF | 6 |
| f__Veillonellaceae       | 966.600 | 1.400  | 1.100 | 1.200  | 0.218 | 0.218 | BF vs MF | 6 |
| f__Veillonellaceae       | 966.600 | 4.500  | 1.200 | 3.700  | <0.01 | <0.01 | BF vs SF | 6 |
| f__Veillonellaceae       | 966.600 | 3.100  | 1.200 | 2.500  | 0.012 | 0.012 | MF vs SF | 6 |
| Faecalibacterium         | 245.100 | -1.200 | 1.100 | -1.100 | 0.265 | 0.265 | BF vs MF | 6 |
| Faecalibacterium         | 245.100 | -1.100 | 1.200 | -0.900 | 0.359 | 0.359 | BF vs SF | 6 |
| Faecalibacterium         | 245.100 | 0.100  | 1.200 | 0.100  | 0.908 | 0.908 | MF vs SF | 6 |
| Haemophilus              | 67.600  | 2.300  | 1.000 | 2.200  | 0.026 | 0.026 | BF vs MF | 6 |
| Haemophilus              | 67.600  | 1.200  | 1.100 | 1.100  | 0.273 | 0.273 | BF vs SF | 6 |
| Haemophilus              | 67.600  | -1.100 | 1.100 | -1.000 | 0.334 | 0.334 | MF vs SF | 6 |
| Lachnospira              | 9.400   | 2.600  | 1.700 | 1.600  | 0.111 | 0.111 | BF vs MF | 6 |
| Lachnospira              | 9.400   | -2.600 | 1.700 | -1.500 | 0.129 | 0.129 | BF vs SF | 6 |
| Lachnospira              | 9.400   | -5.300 | 1.800 | -3.000 | <0.01 | <0.01 | MF vs SF | 6 |
| o__Clostridiales         | 7.800   | 0.600  | 1.000 | 0.600  | 0.578 | 0.578 | BF vs MF | 6 |
| o__Clostridiales         | 7.800   | -2.400 | 1.100 | -2.300 | 0.023 | 0.023 | BF vs SF | 6 |
| o__Clostridiales         | 7.800   | -3.000 | 1.100 | -2.800 | <0.01 | <0.01 | MF vs SF | 6 |
| Oscillospira             | 27.700  | -1.200 | 0.600 | -2.000 | 0.047 | 0.047 | BF vs MF | 6 |
| Oscillospira             | 27.700  | -1.400 | 0.700 | -2.100 | 0.035 | 0.035 | BF vs SF | 6 |
| Oscillospira             | 27.700  | -0.200 | 0.600 | -0.300 | 0.793 | 0.793 | MF vs SF | 6 |
| Parabacteroides          | 478.600 | -0.300 | 1.300 | -0.200 | 0.832 | 0.832 | BF vs MF | 6 |
| Parabacteroides          | 478.600 | 0.200  | 1.400 | 0.200  | 0.871 | 0.871 | BF vs SF | 6 |

On-line Supplementary Material

**Lauren Brink et al. Neonatal diet alters fecal microbiota and metabolome profiles over the first year of life in infants fed breast milk or formula.**

|                 |          |        |       |        |       |       |          |   |
|-----------------|----------|--------|-------|--------|-------|-------|----------|---|
| Parabacteroides | 478.600  | 0.500  | 1.400 | 0.400  | 0.719 | 0.719 | MF vs SF | 6 |
| Roseburia       | 35.200   | -2.800 | 1.600 | -1.700 | 0.091 | 0.091 | BF vs MF | 6 |
| Roseburia       | 35.200   | -4.300 | 1.800 | -2.400 | 0.016 | 0.016 | BF vs SF | 6 |
| Roseburia       | 35.200   | -1.500 | 1.800 | -0.800 | 0.398 | 0.398 | MF vs SF | 6 |
| SMB53           | 18.600   | -0.300 | 0.700 | -0.400 | 0.724 | 0.724 | BF vs MF | 6 |
| SMB53           | 18.600   | -2.000 | 0.800 | -2.600 | <0.01 | <0.01 | BF vs SF | 6 |
| SMB53           | 18.600   | -1.800 | 0.800 | -2.300 | 0.023 | 0.023 | MF vs SF | 6 |
| Streptococcus   | 123.000  | 0.700  | 0.700 | 1.000  | 0.34  | 0.34  | BF vs MF | 6 |
| Streptococcus   | 123.000  | 2.000  | 0.800 | 2.600  | <0.01 | <0.01 | BF vs SF | 6 |
| Streptococcus   | 123.000  | 1.300  | 0.800 | 1.800  | 0.078 | 0.078 | MF vs SF | 6 |
| Sutterella      | 80.700   | -4.600 | 1.600 | -2.900 | <0.01 | <0.01 | BF vs MF | 6 |
| Sutterella      | 80.700   | -4.700 | 1.700 | -2.800 | <0.01 | <0.01 | BF vs SF | 6 |
| Sutterella      | 80.700   | -0.100 | 1.700 | -0.000 | 0.967 | 0.967 | MF vs SF | 6 |
| Veillonella     | 597.600  | 1.400  | 0.700 | 2.000  | 0.048 | 0.048 | BF vs MF | 6 |
| Veillonella     | 597.600  | 3.800  | 0.800 | 4.800  | <0.01 | <0.01 | BF vs SF | 6 |
| Veillonella     | 597.600  | 2.300  | 0.800 | 3.000  | <0.01 | <0.01 | MF vs SF | 6 |
| [Clostridium]   | 59.000   | 1.900  | 0.900 | 2.000  | 0.041 | 0.041 | BF vs MF | 9 |
| [Clostridium]   | 59.000   | 3.900  | 1.000 | 4.100  | <0.01 | <0.01 | BF vs SF | 9 |
| [Clostridium]   | 59.000   | 1.900  | 0.900 | 2.100  | 0.039 | 0.039 | MF vs SF | 9 |
| [Eubacterium]   | 10.100   | 0.400  | 1.100 | 0.400  | 0.705 | 0.705 | BF vs MF | 9 |
| [Eubacterium]   | 10.100   | 0.500  | 1.100 | 0.400  | 0.671 | 0.671 | BF vs SF | 9 |
| [Eubacterium]   | 10.100   | 0.100  | 1.100 | 0.000  | 0.963 | 0.963 | MF vs SF | 9 |
| [Ruminococcus]  | 257.300  | -0.400 | 0.800 | -0.500 | 0.621 | 0.621 | BF vs MF | 9 |
| [Ruminococcus]  | 257.300  | -0.000 | 0.800 | -0.000 | 0.966 | 0.966 | BF vs SF | 9 |
| [Ruminococcus]  | 257.300  | 0.300  | 0.700 | 0.500  | 0.648 | 0.648 | MF vs SF | 9 |
| Akkermansia     | 101.300  | -4.400 | 1.900 | -2.300 | 0.022 | 0.022 | BF vs MF | 9 |
| Akkermansia     | 101.300  | -8.000 | 1.900 | -4.100 | <0.01 | <0.01 | BF vs SF | 9 |
| Akkermansia     | 101.300  | -3.600 | 1.900 | -1.900 | 0.055 | 0.055 | MF vs SF | 9 |
| Bacteroides     | 2768.500 | -0.600 | 0.800 | -0.700 | 0.478 | 0.478 | BF vs MF | 9 |
| Bacteroides     | 2768.500 | -0.100 | 0.800 | -0.100 | 0.896 | 0.896 | BF vs SF | 9 |

On-line Supplementary Material

**Lauren Brink et al. Neonatal diet alters fecal microbiota and metabolome profiles over the first year of life in infants fed breast milk or formula.**

|                        |          |        |       |        |       |       |          |   |
|------------------------|----------|--------|-------|--------|-------|-------|----------|---|
| Bacteroides            | 2768.500 | 0.500  | 0.800 | 0.600  | 0.559 | 0.559 | MF vs SF | 9 |
| Bifidobacterium        | 3091.200 | 0.200  | 0.800 | 0.200  | 0.821 | 0.821 | BF vs MF | 9 |
| Bifidobacterium        | 3091.200 | 2.200  | 0.900 | 2.600  | <0.01 | <0.01 | BF vs SF | 9 |
| Bifidobacterium        | 3091.200 | 2.000  | 0.800 | 2.400  | 0.016 | 0.016 | MF vs SF | 9 |
| Blautia                | 312.900  | 0.700  | 1.200 | 0.600  | 0.56  | 0.56  | BF vs MF | 9 |
| Blautia                | 312.900  | -2.200 | 1.200 | -1.900 | 0.062 | 0.062 | BF vs SF | 9 |
| Blautia                | 312.900  | -2.900 | 1.200 | -2.500 | 0.013 | 0.013 | MF vs SF | 9 |
| Clostridium            | 153.300  | 3.400  | 1.200 | 2.800  | <0.01 | <0.01 | BF vs MF | 9 |
| Clostridium            | 153.300  | 3.300  | 1.200 | 2.700  | <0.01 | <0.01 | BF vs SF | 9 |
| Clostridium            | 153.300  | -0.100 | 1.200 | -0.100 | 0.94  | 0.94  | MF vs SF | 9 |
| Coprococcus            | 67.300   | -0.300 | 1.000 | -0.300 | 0.743 | 0.743 | BF vs MF | 9 |
| Coprococcus            | 67.300   | -1.000 | 1.000 | -1.000 | 0.317 | 0.317 | BF vs SF | 9 |
| Coprococcus            | 67.300   | -0.600 | 1.000 | -0.700 | 0.496 | 0.496 | MF vs SF | 9 |
| Dorea                  | 38.900   | -0.300 | 1.100 | -0.300 | 0.764 | 0.764 | BF vs MF | 9 |
| Dorea                  | 38.900   | -0.700 | 1.100 | -0.600 | 0.537 | 0.537 | BF vs SF | 9 |
| Dorea                  | 38.900   | -0.400 | 1.100 | -0.300 | 0.748 | 0.748 | MF vs SF | 9 |
| Enterococcus           | 11.700   | 2.000  | 1.300 | 1.600  | 0.12  | 0.12  | BF vs MF | 9 |
| Enterococcus           | 11.700   | 4.000  | 1.300 | 3.100  | <0.01 | <0.01 | BF vs SF | 9 |
| Enterococcus           | 11.700   | 2.100  | 1.300 | 1.600  | 0.116 | 0.116 | MF vs SF | 9 |
| f__Bifidobacteriaceae  | 18.400   | 0.500  | 1.100 | 0.500  | 0.635 | 0.635 | BF vs MF | 9 |
| f__Bifidobacteriaceae  | 18.400   | 1.400  | 1.100 | 1.300  | 0.208 | 0.208 | BF vs SF | 9 |
| f__Bifidobacteriaceae  | 18.400   | 0.900  | 1.100 | 0.800  | 0.428 | 0.428 | MF vs SF | 9 |
| f__Clostridiaceae      | 66.900   | -1.400 | 1.000 | -1.300 | 0.182 | 0.182 | BF vs MF | 9 |
| f__Clostridiaceae      | 66.900   | -0.600 | 1.000 | -0.600 | 0.552 | 0.552 | BF vs SF | 9 |
| f__Clostridiaceae      | 66.900   | 0.800  | 1.000 | 0.700  | 0.454 | 0.454 | MF vs SF | 9 |
| f__Enterobacteriaceae  | 1007.200 | 3.600  | 0.800 | 4.500  | <0.01 | <0.01 | BF vs MF | 9 |
| f__Enterobacteriaceae  | 1007.200 | 3.900  | 0.800 | 4.900  | <0.01 | <0.01 | BF vs SF | 9 |
| f__Enterobacteriaceae  | 1007.200 | 0.400  | 0.800 | 0.500  | 0.65  | 0.65  | MF vs SF | 9 |
| f__Erysipelotrichaceae | 32.600   | 1.300  | 0.800 | 1.600  | 0.108 | 0.108 | BF vs MF | 9 |

On-line Supplementary Material

**Lauren Brink et al. Neonatal diet alters fecal microbiota and metabolome profiles over the first year of life in infants fed breast milk or formula.**

|                          |          |        |       |        |       |       |          |   |
|--------------------------|----------|--------|-------|--------|-------|-------|----------|---|
| f__Erysipelotrichaceae   | 32.600   | 1.100  | 0.800 | 1.400  | 0.16  | 0.16  | BF vs SF | 9 |
| f__Erysipelotrichaceae   | 32.600   | -0.200 | 0.800 | -0.200 | 0.835 | 0.835 | MF vs SF | 9 |
| f__Lachnospiraceae       | 335.100  | -0.700 | 0.900 | -0.700 | 0.456 | 0.456 | BF vs MF | 9 |
| f__Lachnospiraceae       | 335.100  | -1.000 | 0.900 | -1.100 | 0.275 | 0.275 | BF vs SF | 9 |
| f__Lachnospiraceae       | 335.100  | -0.300 | 0.900 | -0.400 | 0.726 | 0.726 | MF vs SF | 9 |
| f__Peptostreptococcaceae | 140.700  | -1.400 | 1.100 | -1.200 | 0.222 | 0.222 | BF vs MF | 9 |
| f__Peptostreptococcaceae | 140.700  | -3.400 | 1.100 | -3.000 | <0.01 | <0.01 | BF vs SF | 9 |
| f__Peptostreptococcaceae | 140.700  | -2.000 | 1.100 | -1.800 | 0.072 | 0.072 | MF vs SF | 9 |
| f__Rikenellaceae         | 23.500   | -0.300 | 1.600 | -0.200 | 1     | 1     | BF vs MF | 9 |
| f__Rikenellaceae         | 23.500   | -0.700 | 1.600 | -0.400 | 1     | 1     | BF vs SF | 9 |
| f__Rikenellaceae         | 23.500   | -0.400 | 1.600 | -0.200 | 1     | 1     | MF vs SF | 9 |
| f__Ruminococcaceae       | 256.900  | -0.600 | 0.900 | -0.700 | 1     | 1     | BF vs MF | 9 |
| f__Ruminococcaceae       | 256.900  | -0.500 | 0.900 | -0.500 | 1     | 1     | BF vs SF | 9 |
| f__Ruminococcaceae       | 256.900  | 0.100  | 0.900 | 0.100  | 1     | 1     | MF vs SF | 9 |
| f__Veillonellaceae       | 1022.100 | -0.300 | 1.700 | -0.200 | 0.856 | 0.856 | BF vs MF | 9 |
| f__Veillonellaceae       | 1022.100 | 4.600  | 1.700 | 2.700  | <0.01 | <0.01 | BF vs SF | 9 |
| f__Veillonellaceae       | 1022.100 | 4.900  | 1.700 | 2.900  | <0.01 | <0.01 | MF vs SF | 9 |
| Faecalibacterium         | 479.800  | -1.200 | 1.500 | -0.800 | 0.43  | 0.43  | BF vs MF | 9 |
| Faecalibacterium         | 479.800  | 0.900  | 1.500 | 0.600  | 0.533 | 0.533 | BF vs SF | 9 |
| Faecalibacterium         | 479.800  | 2.100  | 1.400 | 1.400  | 0.153 | 0.153 | MF vs SF | 9 |
| Haemophilus              | 179.500  | 1.500  | 1.200 | 1.200  | 0.224 | 0.224 | BF vs MF | 9 |
| Haemophilus              | 179.500  | 3.800  | 1.200 | 3.000  | <0.01 | <0.01 | BF vs SF | 9 |
| Haemophilus              | 179.500  | 2.300  | 1.200 | 1.800  | 0.065 | 0.065 | MF vs SF | 9 |
| Lachnospira              | 142.400  | -3.500 | 1.600 | -2.100 | 0.035 | 0.035 | BF vs MF | 9 |
| Lachnospira              | 142.400  | -4.400 | 1.600 | -2.700 | <0.01 | <0.01 | BF vs SF | 9 |
| Lachnospira              | 142.400  | -0.900 | 1.600 | -0.600 | 0.571 | 0.571 | MF vs SF | 9 |
| o__Clostridiales         | 7.400    | 0.500  | 1.200 | 0.400  | 0.678 | 0.678 | BF vs MF | 9 |
| o__Clostridiales         | 7.400    | -3.000 | 1.100 | -2.700 | <0.01 | <0.01 | BF vs SF | 9 |

On-line Supplementary Material

**Lauren Brink et al. Neonatal diet alters fecal microbiota and metabolome profiles over the first year of life in infants fed breast milk or formula.**

|                  |         |        |       |        |       |       |           |    |
|------------------|---------|--------|-------|--------|-------|-------|-----------|----|
| o__Clostridiales | 7.400   | -3.500 | 1.100 | -3.100 | <0.01 | <0.01 | MF vs SF  | 9  |
| Oscillospira     | 36.200  | 0.100  | 0.900 | 0.100  | 0.89  | 0.89  | BF vs MF  | 9  |
| Oscillospira     | 36.200  | -0.300 | 0.900 | -0.400 | 0.715 | 0.715 | BF vs SF  | 9  |
| Oscillospira     | 36.200  | -0.500 | 0.900 | -0.500 | 0.61  | 0.61  | MF vs SF  | 9  |
| Parabacteroides  | 523.900 | -8.000 | 1.500 | -5.200 | 1     | 1     | BF vs MF  | 9  |
| Parabacteroides  | 523.900 | -4.700 | 1.500 | -3.100 | 1     | 1     | BF vs SF  | 9  |
| Parabacteroides  | 523.900 | 3.300  | 1.500 | 2.200  | 1     | 1     | MF vs SF  | 9  |
| Roseburia        | 45.700  | -2.800 | 1.600 | -1.700 | 0.083 | 0.083 | BF vs MF  | 9  |
| Roseburia        | 45.700  | -4.000 | 1.600 | -2.500 | 0.013 | 0.013 | BF vs SF  | 9  |
| Roseburia        | 45.700  | -1.200 | 1.600 | -0.800 | 0.44  | 0.44  | MF vs SF  | 9  |
| SMB53            | 43.300  | -1.900 | 1.000 | -1.900 | 0.057 | 0.057 | BF vs MF  | 9  |
| SMB53            | 43.300  | -4.300 | 1.000 | -4.200 | <0.01 | <0.01 | BF vs SF  | 9  |
| SMB53            | 43.300  | -2.300 | 1.000 | -2.400 | 0.017 | 0.017 | MF vs SF  | 9  |
| Streptococcus    | 70.400  | 0.200  | 1.200 | 0.200  | 0.875 | 0.875 | BF vs MF  | 9  |
| Streptococcus    | 70.400  | 1.700  | 1.200 | 1.500  | 0.146 | 0.146 | BF vs SF  | 9  |
| Streptococcus    | 70.400  | 1.500  | 1.100 | 1.300  | 0.189 | 0.189 | MF vs SF  | 9  |
| Sutterella       | 69.900  | -0.500 | 2.000 | -0.200 | 0.809 | 0.809 | BF vs MF  | 9  |
| Sutterella       | 69.900  | -1.800 | 2.000 | -0.900 | 0.376 | 0.376 | BF vs SF  | 9  |
| Sutterella       | 69.900  | -1.300 | 2.000 | -0.700 | 0.514 | 0.514 | MF vs SF  | 9  |
| Veillonella      | 335.600 | 1.600  | 1.000 | 1.600  | 0.114 | 0.114 | BF vs MF  | 9  |
| Veillonella      | 335.600 | 3.400  | 1.000 | 3.300  | <0.01 | <0.01 | BF vs SF  | 9  |
| Veillonella      | 335.600 | 1.700  | 1.000 | 1.700  | 0.089 | 0.089 | MF vs SF  | 9  |
| [Clostridium]    | 87.700  | -0.700 | 1.100 | -0.600 | 0.553 | 0.553 | BF vs MF  | 12 |
| [Clostridium]    | 87.700  | 2.600  | 1.200 | 2.100  | 0.033 | 0.033 | BF vs NLB | 12 |
| [Clostridium]    | 87.700  | 1.000  | 1.100 | 0.900  | 0.377 | 0.377 | BF vs SF  | 12 |
| [Clostridium]    | 87.700  | 3.200  | 1.200 | 2.600  | <0.01 | <0.01 | MF vs NLB | 12 |
| [Clostridium]    | 87.700  | 1.700  | 1.100 | 1.500  | 0.129 | 0.129 | MF vs SF  | 12 |
| [Clostridium]    | 87.700  | -1.600 | 1.200 | -1.300 | 0.205 | 0.205 | NLB vs SF | 12 |
| [Eubacterium]    | 15.000  | -0.100 | 0.800 | -0.200 | 0.868 | 0.868 | BF vs MF  | 12 |

On-line Supplementary Material

**Lauren Brink et al. Neonatal diet alters fecal microbiota and metabolome profiles over the first year of life in infants fed breast milk or formula.**

|                 |          |        |       |        |       |       |           |    |
|-----------------|----------|--------|-------|--------|-------|-------|-----------|----|
| [Eubacterium]   | 15.000   | -0.300 | 0.800 | -0.300 | 0.743 | 0.743 | BF vs NLB | 12 |
| [Eubacterium]   | 15.000   | 1.100  | 0.800 | 1.400  | 0.161 | 0.161 | BF vs SF  | 12 |
| [Eubacterium]   | 15.000   | -0.100 | 0.800 | -0.200 | 0.865 | 0.865 | MF vs NLB | 12 |
| [Eubacterium]   | 15.000   | 1.200  | 0.800 | 1.600  | 0.107 | 0.107 | MF vs SF  | 12 |
| [Eubacterium]   | 15.000   | 1.400  | 0.900 | 1.600  | 0.112 | 0.112 | NLB vs SF | 12 |
| [Ruminococcus]  | 484.900  | -1.000 | 0.600 | -1.800 | 0.078 | 0.078 | BF vs MF  | 12 |
| [Ruminococcus]  | 484.900  | -0.200 | 0.600 | -0.300 | 0.764 | 0.764 | BF vs NLB | 12 |
| [Ruminococcus]  | 484.900  | 0.100  | 0.600 | 0.200  | 0.854 | 0.854 | BF vs SF  | 12 |
| [Ruminococcus]  | 484.900  | 0.800  | 0.600 | 1.300  | 0.191 | 0.191 | MF vs NLB | 12 |
| [Ruminococcus]  | 484.900  | 1.200  | 0.600 | 2.000  | 0.046 | 0.046 | MF vs SF  | 12 |
| [Ruminococcus]  | 484.900  | 0.300  | 0.700 | 0.500  | 0.647 | 0.647 | NLB vs SF | 12 |
| Akkermansia     | 94.100   | 3.000  | 1.400 | 2.200  | 0.03  | 0.03  | BF vs MF  | 12 |
| Akkermansia     | 94.100   | -1.200 | 1.500 | -0.800 | 0.442 | 0.442 | BF vs NLB | 12 |
| Akkermansia     | 94.100   | 0.400  | 1.400 | 0.300  | 0.754 | 0.754 | BF vs SF  | 12 |
| Akkermansia     | 94.100   | -4.200 | 1.500 | -2.700 | <0.01 | <0.01 | MF vs NLB | 12 |
| Akkermansia     | 94.100   | -2.600 | 1.400 | -1.900 | 0.058 | 0.058 | MF vs SF  | 12 |
| Akkermansia     | 94.100   | 1.600  | 1.600 | 1.000  | 0.303 | 0.303 | NLB vs SF | 12 |
| Bacteroides     | 6744.100 | -1.100 | 0.600 | -1.900 | 0.059 | 0.059 | BF vs MF  | 12 |
| Bacteroides     | 6744.100 | -0.100 | 0.600 | -0.200 | 0.826 | 0.826 | BF vs NLB | 12 |
| Bacteroides     | 6744.100 | 0.400  | 0.600 | 0.700  | 0.501 | 0.501 | BF vs SF  | 12 |
| Bacteroides     | 6744.100 | 1.000  | 0.700 | 1.500  | 0.134 | 0.134 | MF vs NLB | 12 |
| Bacteroides     | 6744.100 | 1.500  | 0.600 | 2.600  | <0.01 | <0.01 | MF vs SF  | 12 |
| Bacteroides     | 6744.100 | 0.500  | 0.700 | 0.800  | 0.41  | 0.41  | NLB vs SF | 12 |
| Bifidobacterium | 1396.600 | 0.000  | 0.600 | 0.000  | 0.965 | 0.965 | BF vs MF  | 12 |
| Bifidobacterium | 1396.600 | 1.300  | 0.600 | 2.000  | 0.044 | 0.044 | BF vs NLB | 12 |
| Bifidobacterium | 1396.600 | 2.300  | 0.600 | 3.900  | <0.01 | <0.01 | BF vs SF  | 12 |
| Bifidobacterium | 1396.600 | 1.300  | 0.600 | 1.900  | 0.052 | 0.052 | MF vs NLB | 12 |
| Bifidobacterium | 1396.600 | 2.300  | 0.600 | 4.000  | <0.01 | <0.01 | MF vs SF  | 12 |
| Bifidobacterium | 1396.600 | 1.000  | 0.700 | 1.600  | 0.12  | 0.12  | NLB vs SF | 12 |
| Blautia         | 359.800  | -0.600 | 0.800 | -0.800 | 0.439 | 0.439 | BF vs MF  | 12 |



On-line Supplementary Material

**Lauren Brink et al. Neonatal diet alters fecal microbiota and metabolome profiles over the first year of life in infants fed breast milk or formula.**

|                       |         |        |       |        |       |       |           |    |
|-----------------------|---------|--------|-------|--------|-------|-------|-----------|----|
| Blautia               | 359.800 | -1.500 | 0.800 | -1.800 | 0.064 | 0.064 | BF vs NLB | 12 |
| Blautia               | 359.800 | -1.600 | 0.800 | -2.000 | 0.041 | 0.041 | BF vs SF  | 12 |
| Blautia               | 359.800 | -0.900 | 0.800 | -1.100 | 0.265 | 0.265 | MF vs NLB | 12 |
| Blautia               | 359.800 | -1.000 | 0.700 | -1.300 | 0.186 | 0.186 | MF vs SF  | 12 |
| Blautia               | 359.800 | -0.100 | 0.900 | -0.100 | 0.952 | 0.952 | NLB vs SF | 12 |
| Clostridium           | 119.500 | 1.100  | 1.400 | 0.800  | 0.423 | 0.423 | BF vs MF  | 12 |
| Clostridium           | 119.500 | 2.300  | 1.500 | 1.500  | 0.13  | 0.13  | BF vs NLB | 12 |
| Clostridium           | 119.500 | 5.600  | 1.400 | 4.000  | <0.01 | <0.01 | BF vs SF  | 12 |
| Clostridium           | 119.500 | 1.200  | 1.500 | 0.800  | 0.448 | 0.448 | MF vs NLB | 12 |
| Clostridium           | 119.500 | 4.500  | 1.400 | 3.300  | <0.01 | <0.01 | MF vs SF  | 12 |
| Clostridium           | 119.500 | 3.400  | 1.600 | 2.200  | 0.03  | 0.03  | NLB vs SF | 12 |
| Coprococcus           | 106.800 | -0.400 | 0.700 | -0.500 | 0.605 | 0.605 | BF vs MF  | 12 |
| Coprococcus           | 106.800 | 0.600  | 0.800 | 0.800  | 0.437 | 0.437 | BF vs NLB | 12 |
| Coprococcus           | 106.800 | -0.100 | 0.700 | -0.200 | 0.872 | 0.872 | BF vs SF  | 12 |
| Coprococcus           | 106.800 | 1.000  | 0.800 | 1.200  | 0.217 | 0.217 | MF vs NLB | 12 |
| Coprococcus           | 106.800 | 0.300  | 0.700 | 0.400  | 0.717 | 0.717 | MF vs SF  | 12 |
| Coprococcus           | 106.800 | -0.700 | 0.800 | -0.900 | 0.369 | 0.369 | NLB vs SF | 12 |
| Dorea                 | 59.000  | -0.400 | 0.700 | -0.500 | 0.611 | 0.611 | BF vs MF  | 12 |
| Dorea                 | 59.000  | -1.600 | 0.700 | -2.100 | 0.034 | 0.034 | BF vs NLB | 12 |
| Dorea                 | 59.000  | -0.600 | 0.700 | -0.900 | 0.381 | 0.381 | BF vs SF  | 12 |
| Dorea                 | 59.000  | -1.200 | 0.800 | -1.600 | 0.105 | 0.105 | MF vs NLB | 12 |
| Dorea                 | 59.000  | -0.300 | 0.700 | -0.400 | 0.7   | 0.7   | MF vs SF  | 12 |
| Dorea                 | 59.000  | 1.000  | 0.800 | 1.300  | 0.207 | 0.207 | NLB vs SF | 12 |
| Enterococcus          | 9.300   | 3.500  | 1.400 | 2.500  | 0.011 | 0.011 | BF vs MF  | 12 |
| Enterococcus          | 9.300   | 1.700  | 1.400 | 1.200  | 0.225 | 0.225 | BF vs NLB | 12 |
| Enterococcus          | 9.300   | -1.400 | 1.300 | -1.100 | 0.292 | 0.292 | BF vs SF  | 12 |
| Enterococcus          | 9.300   | -1.800 | 1.500 | -1.200 | 0.245 | 0.245 | MF vs NLB | 12 |
| Enterococcus          | 9.300   | -4.900 | 1.300 | -3.600 | <0.01 | <0.01 | MF vs SF  | 12 |
| Enterococcus          | 9.300   | -3.100 | 1.500 | -2.100 | 0.034 | 0.034 | NLB vs SF | 12 |
| f__Bifidobacteriaceae | 7.300   | -0.200 | 1.100 | -0.200 | 0.862 | 0.862 | BF vs MF  | 12 |

On-line Supplementary Material

**Lauren Brink et al. Neonatal diet alters fecal microbiota and metabolome profiles over the first year of life in infants fed breast milk or formula.**

|                        |         |        |       |        |       |       |           |    |
|------------------------|---------|--------|-------|--------|-------|-------|-----------|----|
| f__Bifidobacteriaceae  | 7.300   | 0.300  | 1.200 | 0.200  | 0.805 | 0.805 | BF vs NLB | 12 |
| f__Bifidobacteriaceae  | 7.300   | 1.100  | 1.200 | 1.000  | 0.325 | 0.325 | BF vs SF  | 12 |
| f__Bifidobacteriaceae  | 7.300   | 0.500  | 1.200 | 0.400  | 0.689 | 0.689 | MF vs NLB | 12 |
| f__Bifidobacteriaceae  | 7.300   | 1.300  | 1.100 | 1.200  | 0.232 | 0.232 | MF vs SF  | 12 |
| f__Bifidobacteriaceae  | 7.300   | 0.800  | 1.300 | 0.700  | 0.513 | 0.513 | NLB vs SF | 12 |
| f__Clostridiaceae      | 174.200 | -0.100 | 1.100 | -0.100 | 0.923 | 0.923 | BF vs MF  | 12 |
| f__Clostridiaceae      | 174.200 | -0.100 | 1.200 | -0.100 | 0.959 | 0.959 | BF vs NLB | 12 |
| f__Clostridiaceae      | 174.200 | -2.700 | 1.100 | -2.400 | 0.016 | 0.016 | BF vs SF  | 12 |
| f__Clostridiaceae      | 174.200 | 0.000  | 1.200 | 0.000  | 0.97  | 0.97  | MF vs NLB | 12 |
| f__Clostridiaceae      | 174.200 | -2.600 | 1.100 | -2.400 | 0.017 | 0.017 | MF vs SF  | 12 |
| f__Clostridiaceae      | 174.200 | -2.600 | 1.200 | -2.100 | 0.033 | 0.033 | NLB vs SF | 12 |
| f__Enterobacteriaceae  | 444.900 | 0.000  | 0.700 | 0.100  | 0.946 | 0.946 | BF vs MF  | 12 |
| f__Enterobacteriaceae  | 444.900 | 1.300  | 0.800 | 1.800  | 0.077 | 0.077 | BF vs NLB | 12 |
| f__Enterobacteriaceae  | 444.900 | 0.200  | 0.700 | 0.200  | 0.829 | 0.829 | BF vs SF  | 12 |
| f__Enterobacteriaceae  | 444.900 | 1.300  | 0.800 | 1.700  | 0.093 | 0.093 | MF vs NLB | 12 |
| f__Enterobacteriaceae  | 444.900 | 0.100  | 0.700 | 0.200  | 0.878 | 0.878 | MF vs SF  | 12 |
| f__Enterobacteriaceae  | 444.900 | -1.200 | 0.800 | -1.500 | 0.128 | 0.128 | NLB vs SF | 12 |
| f__Erysipelotrichaceae | 59.000  | 0.600  | 0.600 | 1.000  | 0.32  | 0.32  | BF vs MF  | 12 |
| f__Erysipelotrichaceae | 59.000  | -0.700 | 0.700 | -1.000 | 0.301 | 0.301 | BF vs NLB | 12 |
| f__Erysipelotrichaceae | 59.000  | 1.800  | 0.700 | 2.800  | <0.01 | <0.01 | BF vs SF  | 12 |
| f__Erysipelotrichaceae | 59.000  | -1.300 | 0.700 | -1.900 | 0.055 | 0.055 | MF vs NLB | 12 |
| f__Erysipelotrichaceae | 59.000  | 1.200  | 0.600 | 1.900  | 0.061 | 0.061 | MF vs SF  | 12 |
| f__Erysipelotrichaceae | 59.000  | 2.500  | 0.700 | 3.500  | <0.01 | <0.01 | NLB vs SF | 12 |
| f__Lachnospiraceae     | 402.100 | -1.500 | 0.500 | -3.100 | <0.01 | <0.01 | BF vs MF  | 12 |
| f__Lachnospiraceae     | 402.100 | -0.000 | 0.500 | -0.100 | 0.948 | 0.948 | BF vs NLB | 12 |
| f__Lachnospiraceae     | 402.100 | -0.700 | 0.500 | -1.400 | 0.168 | 0.168 | BF vs SF  | 12 |
| f__Lachnospiraceae     | 402.100 | 1.400  | 0.500 | 2.700  | <0.01 | <0.01 | MF vs NLB | 12 |

On-line Supplementary Material

**Lauren Brink et al. Neonatal diet alters fecal microbiota and metabolome profiles over the first year of life in infants fed breast milk or formula.**

|                          |         |        |       |        |       |       |           |    |
|--------------------------|---------|--------|-------|--------|-------|-------|-----------|----|
| f__Lachnospiraceae       | 402.100 | 0.800  | 0.500 | 1.700  | 0.087 | 0.087 | MF vs SF  | 12 |
| f__Lachnospiraceae       | 402.100 | -0.600 | 0.500 | -1.200 | 0.236 | 0.236 | NLB vs SF | 12 |
| f__Peptostreptococcaceae | 116.600 | -0.500 | 0.600 | -0.900 | 0.369 | 0.369 | BF vs MF  | 12 |
| f__Peptostreptococcaceae | 116.600 | 0.100  | 0.600 | 0.100  | 0.93  | 0.93  | BF vs NLB | 12 |
| f__Peptostreptococcaceae | 116.600 | -0.700 | 0.600 | -1.300 | 0.183 | 0.183 | BF vs SF  | 12 |
| f__Peptostreptococcaceae | 116.600 | 0.500  | 0.600 | 0.900  | 0.366 | 0.366 | MF vs NLB | 12 |
| f__Peptostreptococcaceae | 116.600 | -0.200 | 0.500 | -0.500 | 0.648 | 0.648 | MF vs SF  | 12 |
| f__Peptostreptococcaceae | 116.600 | -0.800 | 0.600 | -1.300 | 0.196 | 0.196 | NLB vs SF | 12 |
| f__Rikenellaceae         | 59.600  | -3.600 | 1.700 | -2.100 | 0.032 | 0.032 | BF vs MF  | 12 |
| f__Rikenellaceae         | 59.600  | -4.400 | 1.800 | -2.400 | 0.016 | 0.016 | BF vs NLB | 12 |
| f__Rikenellaceae         | 59.600  | -2.300 | 1.700 | -1.400 | 0.177 | 0.177 | BF vs SF  | 12 |
| f__Rikenellaceae         | 59.600  | -0.800 | 1.900 | -0.400 | 0.676 | 0.676 | MF vs NLB | 12 |
| f__Rikenellaceae         | 59.600  | 1.300  | 1.600 | 0.800  | 0.425 | 0.425 | MF vs SF  | 12 |
| f__Rikenellaceae         | 59.600  | 2.100  | 1.900 | 1.100  | 0.266 | 0.266 | NLB vs SF | 12 |
| f__Ruminococcaceae       | 231.800 | 0.000  | 0.600 | 0.100  | 0.951 | 0.951 | BF vs MF  | 12 |
| f__Ruminococcaceae       | 231.800 | 0.300  | 0.700 | 0.400  | 0.665 | 0.665 | BF vs NLB | 12 |
| f__Ruminococcaceae       | 231.800 | 0.100  | 0.600 | 0.100  | 0.903 | 0.903 | BF vs SF  | 12 |
| f__Ruminococcaceae       | 231.800 | 0.300  | 0.700 | 0.400  | 0.712 | 0.712 | MF vs NLB | 12 |
| f__Ruminococcaceae       | 231.800 | 0.000  | 0.600 | 0.100  | 0.95  | 0.95  | MF vs SF  | 12 |
| f__Ruminococcaceae       | 231.800 | -0.200 | 0.700 | -0.300 | 0.758 | 0.758 | NLB vs SF | 12 |
| f__Veillonellaceae       | 440.000 | 0.600  | 1.300 | 0.500  | 0.64  | 0.64  | BF vs MF  | 12 |
| f__Veillonellaceae       | 440.000 | 1.400  | 1.500 | 1.000  | 0.325 | 0.325 | BF vs NLB | 12 |
| f__Veillonellaceae       | 440.000 | 2.000  | 1.400 | 1.400  | 0.152 | 0.152 | BF vs SF  | 12 |
| f__Veillonellaceae       | 440.000 | 0.800  | 1.500 | 0.500  | 0.588 | 0.588 | MF vs NLB | 12 |
| f__Veillonellaceae       | 440.000 | 1.300  | 1.300 | 1.000  | 0.315 | 0.315 | MF vs SF  | 12 |
| f__Veillonellaceae       | 440.000 | 0.500  | 1.500 | 0.300  | 0.73  | 0.73  | NLB vs SF | 12 |
| Faecalibacterium         | 949.700 | -0.100 | 1.000 | -0.100 | 0.944 | 0.944 | BF vs MF  | 12 |
| Faecalibacterium         | 949.700 | -0.500 | 1.100 | -0.500 | 0.641 | 0.641 | BF vs NLB | 12 |

On-line Supplementary Material

**Lauren Brink et al. Neonatal diet alters fecal microbiota and metabolome profiles over the first year of life in infants fed breast milk or formula.**

|                  |         |        |       |        |       |       |           |    |
|------------------|---------|--------|-------|--------|-------|-------|-----------|----|
| Faecalibacterium | 949.700 | 0.900  | 1.000 | 0.900  | 0.373 | 0.373 | BF vs SF  | 12 |
| Faecalibacterium | 949.700 | -0.400 | 1.100 | -0.400 | 0.693 | 0.693 | MF vs NLB | 12 |
| Faecalibacterium | 949.700 | 1.000  | 1.000 | 1.000  | 0.321 | 0.321 | MF vs SF  | 12 |
| Faecalibacterium | 949.700 | 1.400  | 1.100 | 1.300  | 0.208 | 0.208 | NLB vs SF | 12 |
| Haemophilus      | 122.600 | -0.100 | 0.900 | -0.100 | 0.884 | 0.884 | BF vs MF  | 12 |
| Haemophilus      | 122.600 | 2.000  | 1.000 | 2.000  | 0.051 | 0.051 | BF vs NLB | 12 |
| Haemophilus      | 122.600 | 2.100  | 0.900 | 2.200  | 0.025 | 0.025 | BF vs SF  | 12 |
| Haemophilus      | 122.600 | 2.100  | 1.000 | 2.100  | 0.04  | 0.04  | MF vs NLB | 12 |
| Haemophilus      | 122.600 | 2.200  | 0.900 | 2.500  | 0.013 | 0.013 | MF vs SF  | 12 |
| Haemophilus      | 122.600 | 0.100  | 1.000 | 0.100  | 0.886 | 0.886 | NLB vs SF | 12 |
| Lachnospira      | 33.300  | -0.300 | 1.300 | -0.200 | 0.85  | 0.85  | BF vs MF  | 12 |
| Lachnospira      | 33.300  | 3.000  | 1.400 | 2.000  | 0.041 | 0.041 | BF vs NLB | 12 |
| Lachnospira      | 33.300  | -0.100 | 1.300 | -0.100 | 0.931 | 0.931 | BF vs SF  | 12 |
| Lachnospira      | 33.300  | 3.200  | 1.500 | 2.200  | 0.029 | 0.029 | MF vs NLB | 12 |
| Lachnospira      | 33.300  | 0.100  | 1.300 | 0.100  | 0.917 | 0.917 | MF vs SF  | 12 |
| Lachnospira      | 33.300  | -3.100 | 1.500 | -2.100 | 0.039 | 0.039 | NLB vs SF | 12 |
| o__Clostridiales | 12.400  | -0.200 | 0.900 | -0.200 | 0.804 | 0.804 | BF vs MF  | 12 |
| o__Clostridiales | 12.400  | -0.600 | 1.000 | -0.600 | 0.538 | 0.538 | BF vs NLB | 12 |
| o__Clostridiales | 12.400  | -1.800 | 0.900 | -1.900 | 0.056 | 0.056 | BF vs SF  | 12 |
| o__Clostridiales | 12.400  | -0.400 | 1.000 | -0.400 | 0.706 | 0.706 | MF vs NLB | 12 |
| o__Clostridiales | 12.400  | -1.500 | 0.900 | -1.700 | 0.087 | 0.087 | MF vs SF  | 12 |
| o__Clostridiales | 12.400  | -1.200 | 1.000 | -1.100 | 0.257 | 0.257 | NLB vs SF | 12 |
| Oscillospira     | 39.200  | -0.900 | 0.700 | -1.400 | 0.151 | 0.151 | BF vs MF  | 12 |
| Oscillospira     | 39.200  | -0.000 | 0.700 | -0.000 | 0.991 | 0.991 | BF vs NLB | 12 |
| Oscillospira     | 39.200  | 0.300  | 0.700 | 0.500  | 0.63  | 0.63  | BF vs SF  | 12 |
| Oscillospira     | 39.200  | 0.900  | 0.700 | 1.300  | 0.195 | 0.195 | MF vs NLB | 12 |
| Oscillospira     | 39.200  | 1.300  | 0.600 | 2.000  | 0.049 | 0.049 | MF vs SF  | 12 |
| Oscillospira     | 39.200  | 0.300  | 0.700 | 0.400  | 0.654 | 0.654 | NLB vs SF | 12 |

On-line Supplementary Material

**Lauren Brink et al. Neonatal diet alters fecal microbiota and metabolome profiles over the first year of life in infants fed breast milk or formula.**

|                 |         |        |       |        |       |       |           |    |
|-----------------|---------|--------|-------|--------|-------|-------|-----------|----|
| Parabacteroides | 397.800 | -1.800 | 1.300 | -1.400 | 0.154 | 0.154 | BF vs MF  | 12 |
| Parabacteroides | 397.800 | -1.800 | 1.400 | -1.300 | 0.199 | 0.199 | BF vs NLB | 12 |
| Parabacteroides | 397.800 | -2.700 | 1.300 | -2.100 | 0.038 | 0.038 | BF vs SF  | 12 |
| Parabacteroides | 397.800 | 0.000  | 1.400 | 0.000  | 0.974 | 0.974 | MF vs NLB | 12 |
| Parabacteroides | 397.800 | -0.900 | 1.300 | -0.700 | 0.488 | 0.488 | MF vs SF  | 12 |
| Parabacteroides | 397.800 | -0.900 | 1.400 | -0.600 | 0.522 | 0.522 | NLB vs SF | 12 |
| Roseburia       | 36.600  | -0.800 | 1.300 | -0.700 | 0.504 | 0.504 | BF vs MF  | 12 |
| Roseburia       | 36.600  | 2.300  | 1.400 | 1.600  | 0.1   | 0.1   | BF vs NLB | 12 |
| Roseburia       | 36.600  | -0.500 | 1.300 | -0.400 | 0.673 | 0.673 | BF vs SF  | 12 |
| Roseburia       | 36.600  | 3.100  | 1.400 | 2.200  | 0.026 | 0.026 | MF vs NLB | 12 |
| Roseburia       | 36.600  | 0.300  | 1.200 | 0.200  | 0.805 | 0.805 | MF vs SF  | 12 |
| Roseburia       | 36.600  | -2.800 | 1.400 | -2.000 | 0.048 | 0.048 | NLB vs SF | 12 |
| SMB53           | 32.300  | -0.200 | 0.600 | -0.400 | 0.7   | 0.7   | BF vs MF  | 12 |
| SMB53           | 32.300  | -0.400 | 0.700 | -0.500 | 0.599 | 0.599 | BF vs NLB | 12 |
| SMB53           | 32.300  | -1.000 | 0.600 | -1.500 | 0.128 | 0.128 | BF vs SF  | 12 |
| SMB53           | 32.300  | -0.100 | 0.700 | -0.200 | 0.87  | 0.87  | MF vs NLB | 12 |
| SMB53           | 32.300  | -0.700 | 0.600 | -1.200 | 0.241 | 0.241 | MF vs SF  | 12 |
| SMB53           | 32.300  | -0.600 | 0.700 | -0.900 | 0.384 | 0.384 | NLB vs SF | 12 |
| Streptococcus   | 78.300  | -0.700 | 0.800 | -0.900 | 0.349 | 0.349 | BF vs MF  | 12 |
| Streptococcus   | 78.300  | 1.200  | 0.800 | 1.400  | 0.161 | 0.161 | BF vs NLB | 12 |
| Streptococcus   | 78.300  | 1.100  | 0.800 | 1.400  | 0.174 | 0.174 | BF vs SF  | 12 |
| Streptococcus   | 78.300  | 1.900  | 0.900 | 2.200  | 0.026 | 0.026 | MF vs NLB | 12 |
| Streptococcus   | 78.300  | 1.800  | 0.800 | 2.400  | 0.018 | 0.018 | MF vs SF  | 12 |
| Streptococcus   | 78.300  | -0.100 | 0.900 | -0.100 | 0.899 | 0.899 | NLB vs SF | 12 |
| Sutterella      | 190.600 | -1.100 | 1.700 | -0.600 | 0.537 | 0.537 | BF vs MF  | 12 |
| Sutterella      | 190.600 | 0.400  | 1.900 | 0.200  | 0.847 | 0.847 | BF vs NLB | 12 |
| Sutterella      | 190.600 | 1.700  | 1.700 | 1.000  | 0.329 | 0.329 | BF vs SF  | 12 |
| Sutterella      | 190.600 | 1.400  | 1.900 | 0.800  | 0.453 | 0.453 | MF vs NLB | 12 |
| Sutterella      | 190.600 | 2.800  | 1.700 | 1.600  | 0.101 | 0.101 | MF vs SF  | 12 |
| Sutterella      | 190.600 | 1.300  | 1.900 | 0.700  | 0.486 | 0.486 | NLB vs SF | 12 |
| Veillonella     | 152.700 | 2.800  | 0.700 | 3.800  | <0.01 | <0.01 | BF vs MF  | 12 |

On-line Supplementary Material

**Lauren Brink et al. Neonatal diet alters fecal microbiota and metabolome profiles over the first year of life in infants fed breast milk or formula.**

|             |         |        |       |        |       |       |           |    |
|-------------|---------|--------|-------|--------|-------|-------|-----------|----|
| Veillonella | 152.700 | 2.600  | 0.800 | 3.300  | <0.01 | <0.01 | BF vs NLB | 12 |
| Veillonella | 152.700 | 3.900  | 0.700 | 5.200  | <0.01 | <0.01 | BF vs SF  | 12 |
| Veillonella | 152.700 | -0.200 | 0.800 | -0.300 | 0.789 | 0.789 | MF vs NLB | 12 |
| Veillonella | 152.700 | 1.100  | 0.700 | 1.500  | 0.143 | 0.143 | MF vs SF  | 12 |
| Veillonella | 152.700 | 1.300  | 0.800 | 1.500  | 0.121 | 0.121 | NLB vs SF | 12 |

<sup>1</sup>Output from DESeq2 package in R in which pairwise comparisons by diet were performed. BF = Breast-fed, f = family, FDR = false discovery rate, MF = milk formula fed, NLB = no longer breastfeeding, o = order, SE = standard error of mean, SF = soy formula fed. Data are presented at the genera taxonomic level. Sample size range from 10 to 20 per diet group at three, six, nine and 12 months of age.

On-line Supplementary Material

**Lauren Brink et al. Neonatal diet alters fecal microbiota and metabolome profiles over the first year of life in infants fed breast milk or formula.**

**Supplementary Table 4:** Dietary differences in fecal metabolites (Negative Mode) from infants at three, six, nine, and 12 months of age.<sup>1</sup>

| Age | Metabolite                     | BF            | MF             | NLB | SF            | P-value | FDR   |
|-----|--------------------------------|---------------|----------------|-----|---------------|---------|-------|
| 3   | (S)-3,4-Dihydroxybutyric Acid  | 20 (1.79)a    | 20.8 (1.03)a   |     | 19.3 (3.64)a  | 0.496   | 0.57  |
| 3   | 2-Hydroxy-3-methylbutyric Acid | 21.8 (2.57)a  | 21.3 (0.969)a  |     | 18.4 (1)b     | <0.01   | <0.01 |
| 3   | 2-Hydroxyadipic Acid           | 17.8 (2.09)a  | 16.9 (1.38)a   |     | 15.8 (1.49)b  | <0.01   | 0.02  |
| 3   | 2-Oxoglutaric Acid             | 18.7 (4.17)a  | 17 (1.58)a     |     | 14.7 (1.88)b  | <0.01   | 0.021 |
| 3   | 2-Phenylacetic Acid            | 10.8 (3.77)a  | 13.8 (0.933)a  |     | 14.9 (1.59)b  | <0.01   | <0.01 |
| 3   | 3-Dehydroshikimic acid         | 13.2 (2.78)a  | 13.7 (3.64)a   |     | 10.9 (0.765)b | <0.01   | <0.01 |
| 3   | 3-Hydroxybenzoic Acid          | 10.1 (0.947)a | 9.91 (0.168)a  |     | 9.78 (0.397)a | 0.14    | 0.215 |
| 3   | 3-Hydroxybutyric Acid          | 15.9 (2.64)a  | 15.3 (2.01)a   |     | 12.5 (2.72)b  | <0.01   | <0.01 |
| 3   | 3-Methyl-2-oxobutyric Acid     | 20 (2.49)a    | 18.4 (1)a      |     | 15.2 (1.83)b  | <0.01   | <0.01 |
| 3   | 3-Methylthiopropionic Acid     | 8.93 (3.88)a  | 12.7 (1.61)b   |     | 14.6 (0.923)c | <0.01   | <0.01 |
| 3   | 3-O-Methyl-Gallic Acid         | 9.47 (1.69)a  | 9.31 (1.14)a   |     | 15.5 (4.46)b  | <0.01   | <0.01 |
| 3   | 3-Oxoglutaric Acid             | 9.45 (1.53)a  | 9.36 (1.67)a   |     | 8.82 (1.44)a  | 0.357   | 0.439 |
| 3   | 3,5-Dihydroxybenzoic Acid      | 12.8 (2.89)a  | 11.9 (1.76)a   |     | 15.7 (2.27)b  | <0.01   | <0.01 |
| 3   | 4-Hydroxybenzoic Acid          | 15.7 (1.13)a  | 15.2 (1.46)a   |     | 17 (1.08)b    | <0.01   | 0.013 |
| 3   | 4-Hydroxyphenylacetic Acid     | 14.7 (1.11)a  | 17.1 (1.88)ab  |     | 19.2 (2.24)b  | <0.01   | <0.01 |
| 3   | 4-Methylcatechol               | 8.09 (0.778)a | 8.35 (0.447)ab |     | 9.54 (3.07)b  | 0.042   | 0.089 |
| 3   | 4-Methylvaleric Acid           | 8.5 (1.08)a   | 10.6 (3.85)a   |     | 8.57 (2.42)a  | 0.483   | 0.558 |
| 3   | 5-Phenylvaleric Acid           | 11.5 (0.995)a | 11.6 (0.273)a  |     | 10.3 (1.23)b  | <0.01   | <0.01 |
| 3   | a-hydroxyisocaproic acid       | 22.3 (3.76)a  | 22.4 (0.859)a  |     | 19 (2.32)b    | <0.01   | 0.017 |
| 3   | Acetoacetic Acid               | 13 (0.589)a   | 12.9 (0.361)a  |     | 11.6 (0.98)b  | <0.01   | 0.011 |
| 3   | Adenine                        | 11.8 (1.62)ab | 12.3 (0.779)a  |     | 11.3 (1.28)b  | 0.013   | 0.033 |

On-line Supplementary Material

**Lauren Brink et al. Neonatal diet alters fecal microbiota and metabolome profiles over the first year of life in infants fed breast milk or formula.**

|   |                                        |               |                |  |               |       |       |
|---|----------------------------------------|---------------|----------------|--|---------------|-------|-------|
| 3 | Adipic Acid                            | 16.8 (0.565)a | 15.9 (0.649)b  |  | 15.9 (0.789)b | <0.01 | <0.01 |
| 3 | Arachidonic Acid                       | 13.8 (5.33)a  | 12.9 (2.32)a   |  | 13.6 (5.09)a  | 0.461 | 0.54  |
| 3 | Argininosuccinic acid                  | 13.2 (1.94)a  | 13.5 (0.537)a  |  | 13.8 (0.593)a | 0.211 | 0.293 |
| 3 | Atrolactic Acid                        | 21.3 (2.69)a  | 20.6 (2.82)a   |  | 18.3 (4.26)a  | 0.371 | 0.451 |
| 3 | Azelaic Acid                           | 17.2 (0.631)a | 17.8 (0.0924)a |  | 20.7 (1.16)b  | <0.01 | <0.01 |
| 3 | Benzoic Acid                           | 13.1 (0.808)a | 11.4 (1.34)b   |  | 11.8 (1.28)b  | <0.01 | 0.014 |
| 3 | Butyric Acid                           | 13.1 (1.74)a  | 11.2 (0.987)b  |  | 11.2 (1)b     | 0.018 | 0.042 |
| 3 | CA                                     | 22 (0.81)a    | 21.8 (0.979)a  |  | 21.9 (1.28)a  | 0.553 | 0.622 |
| 3 | Caffeic Acid                           | 9.26 (2.1)a   | 8.83 (2.02)a   |  | 12.2 (3.42)b  | <0.01 | <0.01 |
| 3 | CDCA                                   | 18.7 (2.02)a  | 19 (0.761)a    |  | 20.8 (1.31)b  | <0.01 | <0.01 |
| 3 | cis-11,12-Methylene Pentadecanoic Acid | 7.22 (0.606)a | 6.6 (0.287)b   |  | 6.97 (0.7)ab  | 0.036 | 0.078 |
| 3 | Citric Acid                            | 18.7 (2.38)a  | 15.7 (3.16)ab  |  | 16.8 (5.25)b  | 0.069 | 0.13  |
| 3 | Cysteine                               | 14.7 (1.08)a  | 14.8 (0.416)a  |  | 13.5 (0.479)b | <0.01 | <0.01 |
| 3 | DCA                                    | 18.1 (4)a     | 18.6 (4.87)ab  |  | 15.2 (3.4)b   | 0.078 | 0.144 |
| 3 | Dihydro-Isoferulic acid-glucuronide    | 9.09 (1.63)a  | 9.15 (0.592)a  |  | 10.1 (4.84)a  | 0.081 | 0.145 |
| 3 | Dihydrocaffeic acid                    | 12.6 (1.79)a  | 13.4 (2.06)a   |  | 17.9 (3.57)b  | <0.01 | <0.01 |
| 3 | Dihydroferulic Acid                    | 9.65 (0.678)a | 13.1 (1.06)b   |  | 15.4 (2.53)b  | <0.01 | <0.01 |
| 3 | Dihydroferulic Acid-4-Sulfate          | 8.86 (2.93)a  | 8.65 (1.57)a   |  | 8.2 (2.37)a   | 0.999 | 0.999 |
| 3 | Dodecanedioic Acid                     | 14.4 (0.519)a | 14.1 (0.841)ab |  | 13.8 (1.49)b  | 0.064 | 0.124 |
| 3 | Fumaric Acid                           | 16.6 (2.09)a  | 16 (1.15)ab    |  | 15.4 (1.45)b  | 0.096 | 0.161 |
| 3 | GCA                                    | 17.4 (3.14)a  | 17 (1.21)a     |  | 17.3 (2.39)a  | 0.808 | 0.85  |
| 3 | GCDCA                                  | 14.3 (1.52)a  | 14.3 (1.63)a   |  | 15 (1.29)a    | 0.155 | 0.231 |
| 3 | GDCA                                   | 7.27 (3.48)a  | 8.16 (3.14)a   |  | 7.69 (1.81)a  | 0.873 | 0.908 |



On-line Supplementary Material

**Lauren Brink et al. Neonatal diet alters fecal microbiota and metabolome profiles over the first year of life in infants fed breast milk or formula.**

|   |                                     |                |                |  |               |       |       |
|---|-------------------------------------|----------------|----------------|--|---------------|-------|-------|
| 3 | Gentisic acid                       | 8.65 (1.25)a   | 8.41 (1.1)a    |  | 13.2 (0.734)b | <0.01 | <0.01 |
| 3 | Gluconic Acid                       | 19 (1.34)a     | 17.8 (1.13)ab  |  | 16.7 (1.83)b  | 0.027 | 0.062 |
| 3 | glucose                             | 21.7 (1.31)a   | 19.8 (0.453)b  |  | 19 (0.923)b   | <0.01 | <0.01 |
| 3 | GUDCA                               | 9.41 (4.05)a   | 11.1 (3.32)a   |  | 12.4 (3.25)a  | 0.122 | 0.193 |
| 3 | Hexadecanedioic Acid                | 12.3 (0.491)ab | 13 (0.562)a    |  | 12.1 (0.557)b | 0.049 | 0.099 |
| 3 | Hexadecanoic acid                   | 11.3 (0.426)a  | 11 (0.104)a    |  | 11.5 (1.76)a  | 0.277 | 0.363 |
| 3 | Homovanillic Acid                   | 10.4 (2.29)a   | 10.1 (1.15)a   |  | 9.27 (2.03)a  | 0.604 | 0.67  |
| 3 | Hydrocinnamic Acid                  | 7.02 (0.55)a   | 10.7 (3.56)b   |  | 10.2 (2.16)b  | 0.018 | 0.042 |
| 3 | Hydroxyphenyllactic Acid            | 23.2 (3.95)a   | 22.1 (2.08)a   |  | 16.8 (1.17)b  | <0.01 | <0.01 |
| 3 | Indole-2-Carboxylic Acid            | 8.73 (2.71)a   | 14.1 (4.53)b   |  | 10.5 (2.24)a  | <0.01 | <0.01 |
| 3 | Indole-3-Carboxaldehyde             | 15.5 (1.86)a   | 15.6 (0.531)ab |  | 14.7 (1.3)b   | 0.064 | 0.124 |
| 3 | Isocitric Acid                      | 13 (1.62)a     | 13.1 (1)a      |  | 14.9 (0.781)b | <0.01 | <0.01 |
| 3 | Isoferulic Acid 3-o-Sulfate         | 8.51 (1.53)a   | 10.2 (1.88)a   |  | 10.7 (3.23)a  | 0.225 | 0.31  |
| 3 | Isoleucine                          | 16.4 (2.23)a   | 17.3 (0.799)a  |  | 16.9 (1.62)a  | 0.141 | 0.215 |
| 3 | L-(-)-Malic acid                    | 20 (1.62)a     | 20.3 (0.979)a  |  | 19.9 (1.32)a  | 0.643 | 0.702 |
| 3 | Lactic Acid                         | 23.1 (5.2)a    | 22.3 (2.6)a    |  | 17.3 (1.52)b  | <0.01 | <0.01 |
| 3 | Leucine                             | 18.8 (2.04)a   | 18.5 (1.11)a   |  | 18.2 (2.26)a  | 0.921 | 0.938 |
| 3 | m-Coumaric Acid                     | 9.34 (0.889)a  | 9.26 (0.418)a  |  | 9.35 (1.39)a  | 0.761 | 0.805 |
| 3 | m-hydroxy-hydrocinnamic acid        | 22.8 (2.56)a   | 22.2 (1.07)a   |  | 17.7 (2.25)b  | <0.01 | <0.01 |
| 3 | Maleic Acid                         | 12.4 (0.98)a   | 12.5 (0.239)a  |  | 11.6 (0.626)b | <0.01 | 0.019 |
| 3 | Methyl-2-oxovaleric Acid            | 20.9 (2.8)a    | 19.9 (0.684)a  |  | 17 (2.8)b     | <0.01 | <0.01 |
| 3 | Methyl- $\alpha$ -D-Glucopyranoside | 16 (4.2)a      | 16.6 (0.743)a  |  | 15.5 (2.06)a  | 0.25  | 0.335 |
| 3 | Methyl Vanillate                    | 8.8 (1.2)a     | 8.9 (0.762)a   |  | 8.69 (0.736)a | 0.325 | 0.408 |
| 3 | Methylmalonic Acid                  | 16 (1.98)a     | 14.7 (1.26)b   |  | 12.8 (2.54)c  | <0.01 | <0.01 |

On-line Supplementary Material

**Lauren Brink et al. Neonatal diet alters fecal microbiota and metabolome profiles over the first year of life in infants fed breast milk or formula.**

|   |                        |               |                |  |               |       |       |
|---|------------------------|---------------|----------------|--|---------------|-------|-------|
| 3 | Mevalonic Acid         | 14.2 (4.59)a  | 15.6 (2.71)a   |  | 13.7 (1.76)a  | 0.277 | 0.363 |
| 3 | o-Hydroxyhippuric acid | 12.1 (3.58)a  | 9.62 (3.37)ab  |  | 8.51 (2.81)b  | <0.01 | 0.016 |
| 3 | O-Phospho-L-serine     | 12.3 (2.42)a  | 9.74 (1.75)b   |  | 9.41 (3.61)b  | <0.01 | 0.019 |
| 3 | Octadecanedioic Acid   | 12 (1.5)a     | 13.6 (1.49)b   |  | 14.4 (1.47)b  | <0.01 | <0.01 |
| 3 | Octadecanoic acid      | 10.9 (0.487)a | 10.6 (0.333)a  |  | 10.6 (2.33)a  | 0.266 | 0.351 |
| 3 | Orotic Acid            | 17.2 (2.83)a  | 20.6 (1.53)b   |  | 16.2 (2.76)a  | <0.01 | <0.01 |
| 3 | Oxamic Acid            | 10.4 (1.06)a  | 13.4 (1.95)b   |  | 11.7 (0.754)c | <0.01 | <0.01 |
| 3 | p-Coumaric acid        | 11.2 (0.827)a | 12.8 (0.924)b  |  | 15.9 (3.19)c  | <0.01 | <0.01 |
| 3 | Phenol                 | 7.15 (1.23)a  | 7.5 (1.64)ab   |  | 8.91 (1.35)b  | 0.015 | 0.036 |
| 3 | Pimelic Acid           | 14.5 (1.13)ab | 14.1 (0.744)a  |  | 14.6 (1.17)b  | 0.085 | 0.151 |
| 3 | Pyrocatechol           | 10.9 (1.99)a  | 10.5 (1.26)a   |  | 15.3 (4.07)b  | <0.01 | <0.01 |
| 3 | Pyrogallol             | 10.5 (3.47)a  | 10.6 (0.816)a  |  | 9.89 (3.35)a  | 0.689 | 0.737 |
| 3 | Pyruvic acid           | 16.1 (4.83)a  | 13.8 (2.25)b   |  | 13.7 (1.32)b  | <0.01 | 0.011 |
| 3 | Quercetin              | 8.09 (0.793)a | 8.34 (0.792)ab |  | 8.49 (0.565)b | 0.013 | 0.033 |
| 3 | Quinic Acid            | 17.2 (2.08)a  | 17 (1.3)ab     |  | 15.4 (1.73)b  | 0.07  | 0.131 |
| 3 | Raffinose              | 14.6 (1.97)a  | 18.7 (0.697)b  |  | 18.5 (1.54)b  | <0.01 | <0.01 |
| 3 | Rutin                  | 7.16 (1.45)a  | 6.54 (0.273)ab |  | 5.99 (0.644)b | 0.091 | 0.155 |
| 3 | Shikimic Acid          | 14.6 (1.43)a  | 14.1 (1.2)a    |  | 12.2 (1.02)b  | <0.01 | <0.01 |
| 3 | Stercobilin            | 6.63 (2.48)a  | 6.11 (0.315)b  |  | 6.86 (0.583)a | 0.013 | 0.033 |
| 3 | Succinic Acid          | 24.9 (2.34)a  | 23.1 (1.4)ab   |  | 20.6 (3.05)b  | <0.01 | <0.01 |
| 3 | Sucrose                | 17.9 (1.01)a  | 19.7 (1.11)b   |  | 18.5 (0.964)c | <0.01 | 0.011 |
| 3 | TCDCA                  | 10 (1.56)a    | 11.2 (2.84)a   |  | 15.1 (3.86)b  | <0.01 | 0.012 |
| 3 | TDCA                   | 8.98 (2.16)a  | 10.8 (2.61)ab  |  | 13 (2.75)b    | <0.01 | <0.01 |
| 3 | Tetradecanedioic Acid  | 12.7 (0.566)a | 13.1 (0.613)a  |  | 12.2 (0.662)b | 0.033 | 0.073 |

On-line Supplementary Material

**Lauren Brink et al. Neonatal diet alters fecal microbiota and metabolome profiles over the first year of life in infants fed breast milk or formula.**

|   |                                |                |               |  |               |       |       |
|---|--------------------------------|----------------|---------------|--|---------------|-------|-------|
| 3 | Tyrosol                        | 11.7 (0.722)ab | 11.6 (1.42)a  |  | 14.6 (5.72)b  | 0.07  | 0.131 |
| 3 | Undecanedioic Acid             | 15.2 (0.363)ab | 14.6 (0.937)a |  | 16.2 (1.96)b  | 0.015 | 0.036 |
| 3 | Uric Acid                      | 20.3 (3.32)a   | 14.5 (1.31)b  |  | 16 (2.98)b    | <0.01 | <0.01 |
| 3 | Uridine                        | 17.6 (2.9)a    | 17.2 (2.05)a  |  | 16.2 (1.37)a  | 0.206 | 0.289 |
| 6 | (S)-3,4-Dihydroxybutyric Acid  | 20.8 (0.923)a  | 19.9 (2.15)a  |  | 18.3 (2.98)b  | <0.01 | 0.024 |
| 6 | 2-Hydroxy-3-methylbutyric Acid | 22.3 (1.83)a   | 20.7 (1.64)b  |  | 19.9 (1.3)c   | <0.01 | <0.01 |
| 6 | 2-Hydroxyadipic Acid           | 20.4 (4.12)a   | 16.7 (1.22)b  |  | 15.9 (2.15)b  | <0.01 | <0.01 |
| 6 | 2-Oxoglutaric Acid             | 17.5 (3.11)a   | 15.3 (1.63)b  |  | 14.6 (2.08)b  | <0.01 | <0.01 |
| 6 | 2-Phenylacetic Acid            | 11.3 (4.89)a   | 14.1 (0.871)a |  | 15.3 (1.3)b   | <0.01 | <0.01 |
| 6 | 3-Dehydroshikimic acid         | 14.1 (2.69)a   | 12.3 (3.03)b  |  | 10.9 (2.63)c  | <0.01 | <0.01 |
| 6 | 3-Hydroxybenzoic Acid          | 10.3 (0.804)a  | 10.2 (0.646)a |  | 10.3 (0.622)a | 0.327 | 0.408 |
| 6 | 3-Hydroxybutyric Acid          | 17.7 (3.14)a   | 15 (3.09)b    |  | 12.5 (4.7)c   | <0.01 | <0.01 |
| 6 | 3-Methyl-2-oxobutyric Acid     | 20 (1.9)a      | 18.2 (2.06)b  |  | 16.5 (1.95)c  | <0.01 | <0.01 |
| 6 | 3-Methylthiopropionic Acid     | 8.61 (5.33)a   | 13.1 (1.95)b  |  | 13.8 (1.11)b  | <0.01 | 0.015 |
| 6 | 3-O-Methyl-Gallic Acid         | 11.1 (1.93)a   | 10.2 (2.82)a  |  | 14.6 (4.8)b   | <0.01 | <0.01 |
| 6 | 3-Oxoglutaric Acid             | 9.59 (1.66)a   | 9.17 (1.99)a  |  | 9.54 (2.3)a   | 0.299 | 0.385 |
| 6 | 3,5-Dihydroxybenzoic Acid      | 15.1 (1.91)a   | 13.9 (2.93)b  |  | 15.1 (1.59)a  | <0.01 | 0.019 |
| 6 | 4-Hydroxybenzoic Acid          | 15.9 (2.07)a   | 17.3 (2.56)a  |  | 17.7 (1.87)b  | <0.01 | 0.014 |
| 6 | 4-Hydroxyphenylacetic Acid     | 14.4 (3.6)a    | 16.8 (2.34)a  |  | 18.8 (3.9)b   | <0.01 | <0.01 |
| 6 | 4-Methylcatechol               | 8.97 (1.75)a   | 9.26 (1.68)a  |  | 10.7 (2.69)a  | 0.105 | 0.174 |
| 6 | 4-Methylvaleric Acid           | 8.98 (2.35)a   | 9.75 (3.33)a  |  | 9.58 (2.53)a  | 0.404 | 0.484 |
| 6 | 5-Phenylvaleric Acid           | 11.3 (1.22)a   | 11.7 (1.15)a  |  | 10.9 (1.66)a  | 0.12  | 0.19  |
| 6 | a-hydroxyisocaproic acid       | 22.3 (1.77)a   | 21.8 (1.47)a  |  | 20.3 (1.17)b  | <0.01 | <0.01 |
| 6 | Acetoacetic Acid               | 13.1 (1.02)a   | 12.3 (0.885)b |  | 11.7 (0.949)c | <0.01 | <0.01 |

On-line Supplementary Material

**Lauren Brink et al. Neonatal diet alters fecal microbiota and metabolome profiles over the first year of life in infants fed breast milk or formula.**

|   |                                        |               |               |  |               |       |       |
|---|----------------------------------------|---------------|---------------|--|---------------|-------|-------|
| 6 | Adenine                                | 12.3 (1.56)a  | 13.1 (1.18)a  |  | 11.6 (0.682)b | <0.01 | 0.015 |
| 6 | Adipic Acid                            | 16.9 (0.483)a | 15.8 (0.89)b  |  | 16.4 (1.26)ab | <0.01 | 0.025 |
| 6 | Arachidonic Acid                       | 12.8 (2.73)a  | 11 (1.59)a    |  | 10.8 (2.49)a  | 0.47  | 0.546 |
| 6 | Argininosuccinic acid                  | 13.8 (1.67)a  | 12.5 (1.19)b  |  | 13.3 (1.3)a   | <0.01 | 0.02  |
| 6 | Atrolactic Acid                        | 21.7 (2.61)a  | 22 (3.32)a    |  | 22.6 (1.05)a  | 0.177 | 0.253 |
| 6 | Azelaic Acid                           | 17.9 (0.93)a  | 18.2 (0.959)a |  | 20.7 (0.814)b | <0.01 | <0.01 |
| 6 | Benzoic Acid                           | 11.4 (1.97)a  | 11.7 (0.927)a |  | 11.8 (1.56)a  | 0.908 | 0.934 |
| 6 | Butyric Acid                           | 13.3 (0.927)a | 11.9 (1.35)b  |  | 11.3 (2.09)b  | <0.01 | <0.01 |
| 6 | CA                                     | 22.2 (0.841)a | 21.7 (1.23)a  |  | 21.7 (0.965)a | 0.138 | 0.212 |
| 6 | Caffeic Acid                           | 12.4 (4.63)a  | 11.5 (3.27)a  |  | 12.5 (2.63)a  | 0.19  | 0.269 |
| 6 | CDCA                                   | 18.6 (0.969)a | 18.7 (2.43)a  |  | 19.9 (3.08)a  | 0.242 | 0.327 |
| 6 | cis-11,12-Methylene Pentadecanoic Acid | 6.63 (0.876)a | 6.5 (0.444)a  |  | 6.22 (0.595)a | 0.08  | 0.145 |
| 6 | Citric Acid                            | 18.5 (3.93)a  | 14.4 (4.68)b  |  | 12.4 (0.994)b | <0.01 | <0.01 |
| 6 | Cysteine                               | 15 (0.789)a   | 13.9 (1.48)b  |  | 13.5 (0.885)c | <0.01 | <0.01 |
| 6 | DCA                                    | 16.1 (4.97)a  | 16.7 (5.9)a   |  | 14.6 (1.25)a  | 0.599 | 0.668 |
| 6 | Dihydro-Isoferulic acid-glucuronide    | 10.2 (1.3)a   | 9.48 (1.29)a  |  | 11.6 (1.84)b  | <0.01 | <0.01 |
| 6 | Dihydrocaffeic acid                    | 15.2 (4.6)a   | 15 (4.38)a    |  | 19.2 (3.81)b  | <0.01 | <0.01 |
| 6 | Dihydroferulic Acid                    | 13 (5.21)a    | 15.7 (2.83)b  |  | 16.7 (1.18)c  | <0.01 | <0.01 |
| 6 | Dihydroferulic Acid-4-Sulfate          | 9.81 (3.9)a   | 7.82 (1.6)b   |  | 7.72 (0.935)b | 0.013 | 0.033 |
| 6 | Dodecanedioic Acid                     | 14.4 (0.574)a | 13.9 (1.08)a  |  | 14 (0.981)a   | 0.286 | 0.373 |
| 6 | Fumaric Acid                           | 15.6 (1.35)a  | 14.3 (2.16)ab |  | 14 (1.69)b    | 0.039 | 0.082 |
| 6 | GCA                                    | 17.2 (2.14)a  | 16.9 (2.81)a  |  | 16.5 (2.23)a  | 0.418 | 0.496 |
| 6 | GCDCA                                  | 14.3 (2.42)a  | 15 (3.02)a    |  | 15.5 (2.14)a  | 0.19  | 0.269 |

On-line Supplementary Material

**Lauren Brink et al. Neonatal diet alters fecal microbiota and metabolome profiles over the first year of life in infants fed breast milk or formula.**

|   |                                     |               |                |  |               |       |       |
|---|-------------------------------------|---------------|----------------|--|---------------|-------|-------|
| 6 | GDCA                                | 7.14 (3.15)a  | 7.62 (3.27)a   |  | 7.06 (0.964)a | 0.395 | 0.474 |
| 6 | Gentisic acid                       | 10.1 (2.07)a  | 11.5 (2.91)a   |  | 13.5 (1.53)b  | <0.01 | <0.01 |
| 6 | Gluconic Acid                       | 18.9 (1.47)a  | 17.6 (1.19)b   |  | 17.1 (3.05)b  | <0.01 | <0.01 |
| 6 | glucose                             | 21.4 (1.18)a  | 19.8 (1.24)b   |  | 19.5 (1.22)b  | <0.01 | <0.01 |
| 6 | GUDCA                               | 9.16 (5.04)a  | 12.1 (2.61)b   |  | 13.9 (2.62)b  | 0.025 | 0.058 |
| 6 | Hexadecanedioic Acid                | 11.9 (1.3)a   | 12.6 (0.707)a  |  | 12.4 (1.38)a  | 0.156 | 0.231 |
| 6 | Hexadecanoic acid                   | 11.2 (0.538)a | 10.8 (0.453)b  |  | 10.8 (0.688)b | 0.047 | 0.097 |
| 6 | Homovanillic Acid                   | 11.2 (0.776)a | 11.1 (2.03)a   |  | 12 (1.83)a    | 0.11  | 0.179 |
| 6 | Hydrocinnamic Acid                  | 7.84 (3.73)a  | 11.2 (4.02)b   |  | 11.5 (4.23)ab | 0.062 | 0.12  |
| 6 | Hydroxyphenyllactic Acid            | 23.2 (1.81)a  | 21.6 (3.4)b    |  | 17.8 (2.09)c  | <0.01 | <0.01 |
| 6 | Indole-2-Carboxylic Acid            | 12.4 (2.25)ab | 12.1 (5.02)a   |  | 9.59 (1.65)b  | 0.044 | 0.092 |
| 6 | Indole-3-Carboxaldehyde             | 16 (2.01)a    | 16.8 (2.72)a   |  | 15.3 (1.66)a  | 0.166 | 0.24  |
| 6 | Isocitric Acid                      | 13.3 (1.45)a  | 13.1 (1.4)a    |  | 14.5 (0.798)b | <0.01 | <0.01 |
| 6 | Isoferulic Acid 3-o-Sulfate         | 11.9 (4.73)a  | 9.98 (4.41)a   |  | 11.2 (5.31)a  | 0.365 | 0.446 |
| 6 | Isoleucine                          | 16.2 (2.26)a  | 17.9 (1.6)b    |  | 18 (2.42)b    | <0.01 | 0.025 |
| 6 | L(-)-Malic acid                     | 19.8 (2.09)a  | 18.6 (2.23)a   |  | 19.9 (1.17)a  | 0.366 | 0.446 |
| 6 | Lactic Acid                         | 25.4 (3.58)a  | 19.9 (3.06)b   |  | 17.7 (1.47)c  | <0.01 | <0.01 |
| 6 | Leucine                             | 19.1 (1.22)a  | 18.9 (1.71)a   |  | 19.1 (1.88)a  | 0.824 | 0.864 |
| 6 | m-Coumaric Acid                     | 9.48 (1.34)a  | 9.35 (0.788)a  |  | 9.91 (1.88)a  | 0.164 | 0.238 |
| 6 | m-hydroxy-hydrocinnamic acid        | 23.2 (2.22)a  | 20.8 (2.47)b   |  | 17.6 (3.34)c  | <0.01 | <0.01 |
| 6 | Maleic Acid                         | 12.4 (1.53)a  | 12.2 (0.938)ab |  | 12.1 (0.68)b  | 0.052 | 0.104 |
| 6 | Methyl-2-oxovaleric Acid            | 20.9 (1.21)a  | 20 (1.71)b     |  | 18.6 (2.29)c  | <0.01 | <0.01 |
| 6 | Methyl- $\alpha$ -D-Glucopyranoside | 20.3 (2.93)a  | 16.7 (3.98)b   |  | 16.2 (3.68)b  | 0.058 | 0.113 |
| 6 | Methyl Vanillate                    | 9.34 (1.16)a  | 9.14 (1.24)a   |  | 8.91 (1.54)a  | 0.92  | 0.938 |

On-line Supplementary Material

**Lauren Brink et al. Neonatal diet alters fecal microbiota and metabolome profiles over the first year of life in infants fed breast milk or formula.**

|   |                        |               |               |  |               |       |       |
|---|------------------------|---------------|---------------|--|---------------|-------|-------|
| 6 | Methylmalonic Acid     | 16.9 (1.12)a  | 14 (1.19)b    |  | 13.3 (1.68)b  | <0.01 | <0.01 |
| 6 | Mevalonic Acid         | 13.7 (3.38)ab | 14.5 (2.14)a  |  | 12.8 (1.55)b  | 0.038 | 0.082 |
| 6 | o-Hydroxyhippuric acid | 13 (2.67)a    | 10.5 (3.51)b  |  | 9.25 (1.3)c   | <0.01 | <0.01 |
| 6 | O-Phospho-L-serine     | 12.6 (3.8)a   | 9.54 (4.31)b  |  | 7.95 (2.12)b  | <0.01 | <0.01 |
| 6 | Octadecanedioic Acid   | 11.8 (0.931)a | 12.9 (1.54)b  |  | 12.9 (2.13)b  | 0.013 | 0.033 |
| 6 | Octadecanoic acid      | 10.6 (0.609)a | 10.6 (0.524)a |  | 10.3 (0.476)a | 0.116 | 0.187 |
| 6 | Orotic Acid            | 18.6 (2.3)a   | 18.8 (2.85)a  |  | 16.6 (1.11)b  | 0.018 | 0.044 |
| 6 | Oxamic Acid            | 11 (1.56)a    | 13.4 (2.69)b  |  | 11.7 (1.62)c  | <0.01 | <0.01 |
| 6 | p-Coumaric acid        | 13.8 (2.18)a  | 14.6 (1.86)b  |  | 15 (1.84)b    | 0.011 | 0.028 |
| 6 | Phenol                 | 7.93 (1.84)a  | 7.97 (2.68)a  |  | 8.98 (1.91)a  | 0.143 | 0.216 |
| 6 | Pimelic Acid           | 15 (0.605)ab  | 14.5 (0.792)a |  | 15.5 (1.48)b  | 0.019 | 0.044 |
| 6 | Pyrocatechol           | 13.1 (2.44)a  | 12.5 (2.91)a  |  | 17 (1.13)b    | <0.01 | <0.01 |
| 6 | Pyrogallol             | 11 (2.14)a    | 9.31 (2.78)b  |  | 11.2 (1.92)a  | <0.01 | 0.012 |
| 6 | Pyruvic acid           | 19.1 (5.4)a   | 14.4 (0.92)b  |  | 13.1 (2.02)c  | <0.01 | <0.01 |
| 6 | Quercetin              | 8.1 (0.761)ab | 7.9 (0.436)a  |  | 8.58 (0.447)b | <0.01 | <0.01 |
| 6 | Quinic Acid            | 19.4 (4.52)a  | 17.7 (1.44)b  |  | 17.8 (1.98)b  | 0.018 | 0.043 |
| 6 | Raffinose              | 16.4 (2.21)a  | 18.7 (0.654)b |  | 17.9 (1.27)c  | <0.01 | <0.01 |
| 6 | Rutin                  | 7.15 (1.47)a  | 6.23 (0.477)b |  | 6.14 (0.694)b | <0.01 | 0.019 |
| 6 | Shikimic Acid          | 15.6 (1.99)a  | 13.4 (1.5)b   |  | 12.5 (1.5)b   | <0.01 | <0.01 |
| 6 | Stercobilin            | 6.47 (1.24)ab | 6.22 (0.382)a |  | 6.75 (0.627)b | <0.01 | 0.021 |
| 6 | Succinic Acid          | 22.3 (2.74)a  | 21.1 (2.9)ab  |  | 20.8 (1.29)b  | 0.07  | 0.131 |
| 6 | Sucrose                | 18.1 (1.3)a   | 19.6 (1.22)b  |  | 19.2 (1.45)b  | <0.01 | 0.011 |
| 6 | TCDCA                  | 10.2 (3.97)a  | 11.8 (4.21)a  |  | 15.6 (3.41)b  | <0.01 | 0.013 |
| 6 | TDCA                   | 8.91 (2.14)a  | 10.4 (3.37)a  |  | 13.4 (3.44)b  | <0.01 | <0.01 |

On-line Supplementary Material

**Lauren Brink et al. Neonatal diet alters fecal microbiota and metabolome profiles over the first year of life in infants fed breast milk or formula.**

|   |                                |               |               |  |               |       |       |
|---|--------------------------------|---------------|---------------|--|---------------|-------|-------|
| 6 | Tetradecanedioic Acid          | 13 (1.42)a    | 13.4 (0.983)a |  | 13.2 (0.938)a | 0.339 | 0.42  |
| 6 | Tyrosol                        | 11.9 (2.11)a  | 13.5 (3.42)a  |  | 16.9 (5.7)b   | <0.01 | 0.016 |
| 6 | Undecanedioic Acid             | 15 (0.522)ab  | 14.4 (1.35)a  |  | 15.5 (1.48)b  | 0.038 | 0.082 |
| 6 | Uric Acid                      | 20 (4.59)a    | 14.9 (2.29)b  |  | 16.4 (2.89)b  | <0.01 | <0.01 |
| 6 | Uridine                        | 17 (3.91)a    | 15.7 (1.68)a  |  | 16 (1.19)a    | 0.24  | 0.327 |
| 9 | (S)-3,4-Dihydroxybutyric Acid  | 21.1 (2.99)a  | 22.1 (3.39)a  |  | 18.2 (1.48)b  | <0.01 | <0.01 |
| 9 | 2-Hydroxy-3-methylbutyric Acid | 22.3 (3.08)a  | 21.2 (1.83)a  |  | 19.1 (1.86)b  | <0.01 | <0.01 |
| 9 | 2-Hydroxyadipic Acid           | 18.6 (2)a     | 17.2 (1.62)b  |  | 15.7 (3.22)c  | <0.01 | <0.01 |
| 9 | 2-Oxoglutaric Acid             | 15.3 (2.18)a  | 14.5 (2.97)b  |  | 13.1 (1.63)b  | <0.01 | 0.018 |
| 9 | 2-Phenylacetic Acid            | 13.9 (1.92)a  | 14.1 (0.884)a |  | 15.9 (1.97)b  | <0.01 | <0.01 |
| 9 | 3-Dehydroshikimic acid         | 14.7 (2.25)a  | 13.6 (2.39)a  |  | 11.3 (1.95)b  | <0.01 | <0.01 |
| 9 | 3-Hydroxybenzoic Acid          | 10.6 (1.03)a  | 10.9 (0.996)a |  | 10.5 (0.729)a | 0.12  | 0.191 |
| 9 | 3-Hydroxybutyric Acid          | 15.2 (3.9)a   | 15.1 (3.75)a  |  | 13.6 (4.23)a  | 0.211 | 0.293 |
| 9 | 3-Methyl-2-oxobutyric Acid     | 17.1 (2.18)a  | 15.9 (3.21)b  |  | 15.4 (3.77)b  | <0.01 | 0.024 |
| 9 | 3-Methylthiopropionic Acid     | 13 (3.79)a    | 12 (3.23)a    |  | 14 (0.664)b   | <0.01 | 0.025 |
| 9 | 3-O-Methyl-Gallic Acid         | 14.1 (1)a     | 11.1 (3.4)b   |  | 16.3 (2.45)c  | <0.01 | <0.01 |
| 9 | 3-Oxoglutaric Acid             | 11.1 (1.77)a  | 11.9 (1.37)a  |  | 11.1 (3)a     | 0.294 | 0.38  |
| 9 | 3,5-Dihydroxybenzoic Acid      | 17.4 (1.83)a  | 16.4 (2.48)b  |  | 15.8 (1.48)b  | <0.01 | 0.018 |
| 9 | 4-Hydroxybenzoic Acid          | 18.7 (1.51)a  | 17.8 (0.936)a |  | 18.4 (1.08)a  | 0.474 | 0.55  |
| 9 | 4-Hydroxyphenylacetic Acid     | 17.6 (2.5)a   | 17 (3.12)a    |  | 17.9 (2.63)a  | 0.679 | 0.731 |
| 9 | 4-Methylcatechol               | 10.8 (2.19)a  | 9.89 (1.67)a  |  | 11.2 (3.87)a  | 0.581 | 0.65  |
| 9 | 4-Methylvaleric Acid           | 9.4 (2.75)a   | 8.88 (1.45)a  |  | 9.9 (1.29)a   | 0.717 | 0.763 |
| 9 | 5-Phenylvaleric Acid           | 11.2 (1.17)ab | 11.8 (0.75)a  |  | 10.6 (0.927)b | 0.092 | 0.156 |
| 9 | a-hydroxyisocaproic acid       | 22.7 (3.21)a  | 21.8 (0.686)a |  | 19.2 (1.83)b  | <0.01 | <0.01 |

On-line Supplementary Material

**Lauren Brink et al. Neonatal diet alters fecal microbiota and metabolome profiles over the first year of life in infants fed breast milk or formula.**

|   |                                        |               |                |  |               |       |       |
|---|----------------------------------------|---------------|----------------|--|---------------|-------|-------|
| 9 | Acetoacetic Acid                       | 12.8 (1.06)a  | 12.4 (0.605)ab |  | 11.9 (0.669)b | <0.01 | 0.025 |
| 9 | Adenine                                | 13 (3.23)a    | 12.7 (3.89)a   |  | 11.1 (0.555)b | <0.01 | <0.01 |
| 9 | Adipic Acid                            | 16.9 (0.598)a | 16.2 (0.557)b  |  | 16.4 (1.41)ab | 0.05  | 0.101 |
| 9 | Arachidonic Acid                       | 11.8 (0.626)a | 10.9 (1.18)b   |  | 11.2 (0.87)b  | <0.01 | 0.011 |
| 9 | Argininosuccinic acid                  | 13.1 (0.979)a | 12.4 (1.24)a   |  | 13.1 (0.781)a | 0.415 | 0.494 |
| 9 | Atrolactic Acid                        | 22.9 (1.24)a  | 22.3 (1.78)a   |  | 22.9 (1.06)a  | 0.683 | 0.733 |
| 9 | Azelaic Acid                           | 18.2 (1.28)a  | 18.3 (0.588)a  |  | 20.6 (1.25)b  | <0.01 | <0.01 |
| 9 | Benzoic Acid                           | 11.8 (0.913)a | 12.4 (2.17)a   |  | 12.1 (1.1)a   | 0.655 | 0.71  |
| 9 | Butyric Acid                           | 12.8 (1.53)a  | 12.4 (1.11)ab  |  | 11.9 (2.48)b  | 0.077 | 0.143 |
| 9 | CA                                     | 22.6 (0.993)a | 21.6 (0.687)b  |  | 21.8 (0.403)b | <0.01 | 0.011 |
| 9 | Caffeic Acid                           | 14.5 (1.65)a  | 13.1 (1.54)a   |  | 13.7 (1.61)a  | 0.124 | 0.195 |
| 9 | CDCA                                   | 19.7 (0.803)a | 18.7 (1.39)a   |  | 19.8 (1.63)a  | 0.134 | 0.207 |
| 9 | cis-11,12-Methylene Pentadecanoic Acid | 6.72 (0.502)a | 6.36 (0.198)b  |  | 6.17 (0.644)b | 0.024 | 0.055 |
| 9 | Citric Acid                            | 14.8 (5.03)a  | 13.8 (5.07)a   |  | 12.3 (2.47)b  | <0.01 | 0.024 |
| 9 | Cysteine                               | 14.4 (1.78)a  | 14.7 (2.06)a   |  | 13.6 (0.69)a  | 0.383 | 0.464 |
| 9 | DCA                                    | 15.9 (3.43)a  | 16.6 (4.2)a    |  | 16 (3.17)a    | 0.947 | 0.952 |
| 9 | Dihydro-Isoferulic acid-glucuronide    | 11.6 (1.68)a  | 10.4 (1.22)a   |  | 11.4 (1.4)a   | 0.106 | 0.174 |
| 9 | Dihydrocaffeic acid                    | 18.5 (5.03)a  | 16.5 (4.84)a   |  | 18.2 (6.05)a  | 0.856 | 0.895 |
| 9 | Dihydroferulic Acid                    | 17.3 (2.59)a  | 14.7 (3.59)a   |  | 15.8 (2.32)a  | 0.226 | 0.31  |
| 9 | Dihydroferulic Acid-4-Sulfate          | 9.65 (3.77)a  | 8.68 (3.77)a   |  | 7.99 (2.04)a  | 0.112 | 0.182 |
| 9 | Dodecanedioic Acid                     | 15.1 (1.12)a  | 14.6 (1.01)a   |  | 14.6 (1.77)a  | 0.58  | 0.65  |
| 9 | Fumaric Acid                           | 16.2 (1.16)a  | 14.2 (0.884)b  |  | 14.3 (1.75)b  | <0.01 | <0.01 |
| 9 | GCA                                    | 17.5 (2)a     | 15.1 (1.25)b   |  | 16.4 (1.38)b  | <0.01 | <0.01 |



On-line Supplementary Material

**Lauren Brink et al. Neonatal diet alters fecal microbiota and metabolome profiles over the first year of life in infants fed breast milk or formula.**

|   |                                     |               |               |  |               |       |       |
|---|-------------------------------------|---------------|---------------|--|---------------|-------|-------|
| 9 | GCDCA                               | 15.7 (1.69)a  | 14.4 (2.07)a  |  | 15.1 (0.807)a | 0.11  | 0.179 |
| 9 | GDCA                                | 7.42 (3.15)a  | 7.65 (2.31)a  |  | 7.02 (2.94)a  | 0.95  | 0.953 |
| 9 | Gentisic acid                       | 13 (2.35)a    | 14.1 (0.965)a |  | 13.4 (2.12)a  | 0.16  | 0.236 |
| 9 | Gluconic Acid                       | 19.7 (1.4)a   | 19.2 (2.5)b   |  | 16.2 (1.64)c  | <0.01 | <0.01 |
| 9 | glucose                             | 20.4 (1.2)a   | 20.2 (0.816)a |  | 19.5 (1.03)a  | 0.334 | 0.416 |
| 9 | GUDCA                               | 13.9 (2.9)a   | 12.1 (3.34)a  |  | 13.6 (1.82)a  | 0.521 | 0.592 |
| 9 | Hexadecanedioic Acid                | 12.8 (1.43)a  | 12.7 (0.46)a  |  | 13 (1.33)a    | 0.625 | 0.688 |
| 9 | Hexadecanoic acid                   | 11.2 (0.749)a | 10.9 (0.432)b |  | 10.6 (0.393)b | <0.01 | 0.012 |
| 9 | Homovanillic Acid                   | 12 (2.98)a    | 12.3 (3.35)a  |  | 13.7 (1.85)a  | 0.528 | 0.598 |
| 9 | Hydrocinnamic Acid                  | 10.6 (5.35)a  | 12 (3.46)a    |  | 11.2 (4.52)a  | 0.867 | 0.905 |
| 9 | Hydroxyphenyllactic Acid            | 23.6 (3.68)a  | 20.8 (3.1)a   |  | 18.7 (1.56)b  | <0.01 | <0.01 |
| 9 | Indole-2-Carboxylic Acid            | 9.56 (3.45)a  | 12.5 (5.13)a  |  | 10.5 (2.32)a  | 0.163 | 0.238 |
| 9 | Indole-3-Carboxaldehyde             | 16.5 (2.2)a   | 15.1 (1.79)b  |  | 15.2 (2.01)b  | 0.038 | 0.082 |
| 9 | Isocitric Acid                      | 13.7 (1.73)a  | 13 (1.09)b    |  | 13.9 (0.888)a | <0.01 | 0.025 |
| 9 | Isoferulic Acid 3-o-Sulfate         | 14.9 (5.22)a  | 13.6 (7.47)a  |  | 12 (5.13)a    | 0.652 | 0.709 |
| 9 | Isoleucine                          | 17.1 (3.39)a  | 17.6 (2.49)ab |  | 18.7 (1.89)b  | 0.049 | 0.1   |
| 9 | L(-)-Malic acid                     | 20.5 (1.74)a  | 19.7 (2.22)a  |  | 19.6 (1.36)a  | 0.304 | 0.389 |
| 9 | Lactic Acid                         | 20.2 (4.48)a  | 18.9 (3.23)a  |  | 18 (2.21)b    | <0.01 | 0.021 |
| 9 | Leucine                             | 18.3 (1.46)a  | 18.5 (1.85)a  |  | 19.7 (1.24)b  | 0.048 | 0.098 |
| 9 | m-Coumaric Acid                     | 9.92 (0.73)a  | 9.67 (2.16)a  |  | 9.54 (1.61)a  | 0.909 | 0.934 |
| 9 | m-hydroxy-hydrocinnamic acid        | 21.8 (2.43)a  | 19.9 (1.97)a  |  | 16.7 (1.3)b   | <0.01 | <0.01 |
| 9 | Maleic Acid                         | 12.4 (0.693)a | 12.4 (1.12)a  |  | 12.3 (1.72)a  | 0.635 | 0.695 |
| 9 | Methyl-2-oxovaleric Acid            | 19.4 (1.95)a  | 17.7 (3.26)b  |  | 18.1 (3.01)b  | 0.011 | 0.03  |
| 9 | Methyl- $\alpha$ -D-Glucopyranoside | 19.4 (2.43)a  | 16.8 (4.6)a   |  | 17.5 (3.02)a  | 0.129 | 0.203 |

On-line Supplementary Material

**Lauren Brink et al. Neonatal diet alters fecal microbiota and metabolome profiles over the first year of life in infants fed breast milk or formula.**

|   |                        |               |               |  |               |       |       |
|---|------------------------|---------------|---------------|--|---------------|-------|-------|
| 9 | Methyl Vanillate       | 9.93 (1.24)a  | 9.59 (0.726)a |  | 8.95 (1.4)a   | 0.241 | 0.327 |
| 9 | Methylmalonic Acid     | 16 (1.66)a    | 12.8 (1.87)b  |  | 13.7 (1.64)b  | <0.01 | <0.01 |
| 9 | Mevalonic Acid         | 15.1 (2.87)a  | 13.8 (1.55)a  |  | 12.9 (0.891)a | 0.086 | 0.151 |
| 9 | o-Hydroxyhippuric acid | 11.6 (1.41)a  | 10 (4)ab      |  | 9.18 (0.705)b | <0.01 | 0.015 |
| 9 | O-Phospho-L-serine     | 11 (4.56)a    | 10.1 (2.03)ab |  | 8.9 (2.35)b   | 0.097 | 0.163 |
| 9 | Octadecanedioic Acid   | 12.4 (1.86)a  | 12.9 (1.6)a   |  | 13.6 (0.945)a | 0.214 | 0.297 |
| 9 | Octadecanoic acid      | 10.9 (0.474)a | 10.5 (0.429)b |  | 10.2 (0.657)c | <0.01 | <0.01 |
| 9 | Orotic Acid            | 18.1 (2.76)a  | 17.4 (2.5)a   |  | 15.2 (1.39)b  | 0.014 | 0.034 |
| 9 | Oxamic Acid            | 12.9 (2.88)a  | 13.7 (1.92)a  |  | 11.1 (1.94)b  | 0.042 | 0.089 |
| 9 | p-Coumaric acid        | 16.1 (2.9)a   | 16.4 (1.9)a   |  | 15 (2.11)a    | 0.518 | 0.59  |
| 9 | Phenol                 | 8.46 (3.17)a  | 8.72 (5.87)a  |  | 8.76 (2.35)a  | 0.518 | 0.59  |
| 9 | Pimelic Acid           | 15.5 (1.67)a  | 15.4 (0.521)a |  | 15.6 (2.02)a  | 0.63  | 0.692 |
| 9 | Pyrocatechol           | 15.8 (1.35)a  | 15.1 (3.22)a  |  | 17.2 (0.688)b | 0.018 | 0.042 |
| 9 | Pyrogallol             | 10.8 (1.7)a   | 10.9 (2.31)ab |  | 12.4 (2.55)b  | 0.054 | 0.107 |
| 9 | Pyruvic acid           | 16.7 (2.35)a  | 14.1 (1.6)b   |  | 13.9 (1.23)b  | <0.01 | 0.015 |
| 9 | Quercetin              | 8.42 (1.35)ab | 8.05 (0.791)a |  | 8.48 (0.408)b | 0.081 | 0.145 |
| 9 | Quinic Acid            | 19.8 (1.59)a  | 18.6 (1.93)ab |  | 18.4 (0.93)b  | 0.024 | 0.057 |
| 9 | Raffinose              | 18.4 (3.06)a  | 18.2 (0.908)a |  | 17.9 (1.25)a  | 0.715 | 0.762 |
| 9 | Rutin                  | 7.59 (1.98)a  | 6.23 (0.45)a  |  | 6.37 (1.85)a  | 0.09  | 0.154 |
| 9 | Shikimic Acid          | 15 (1.3)a     | 14 (1.86)a    |  | 13.1 (0.832)b | <0.01 | 0.012 |
| 9 | Stercobilin            | 6.92 (0.906)a | 6.65 (0.49)a  |  | 6.78 (1.12)a  | 0.942 | 0.95  |
| 9 | Succinic Acid          | 21.2 (2.45)a  | 20.8 (1.96)a  |  | 21.3 (5.23)a  | 0.417 | 0.496 |
| 9 | Sucrose                | 19.7 (1.85)a  | 19.4 (0.77)a  |  | 19.8 (1.27)a  | 0.88  | 0.911 |
| 9 | TCDCa                  | 14.2 (2.66)a  | 11.6 (1.38)b  |  | 13.7 (4.75)a  | <0.01 | 0.026 |

On-line Supplementary Material

**Lauren Brink et al. Neonatal diet alters fecal microbiota and metabolome profiles over the first year of life in infants fed breast milk or formula.**

|    |                                |               |               |               |               |       |       |
|----|--------------------------------|---------------|---------------|---------------|---------------|-------|-------|
| 9  | TDCA                           | 10.1 (2.01)a  | 10.6 (3.18)a  |               | 13.5 (3.63)a  | 0.18  | 0.256 |
| 9  | Tetradecanedioic Acid          | 13.6 (0.39)a  | 13.2 (0.865)b |               | 13.4 (1.06)ab | 0.047 | 0.097 |
| 9  | Tyrosol                        | 14.5 (2.35)a  | 15.5 (2.1)ab  |               | 17.6 (4.64)b  | 0.031 | 0.07  |
| 9  | Undecanedioic Acid             | 15.4 (1.47)a  | 15.2 (1.63)a  |               | 16.7 (0.914)b | <0.01 | <0.01 |
| 9  | Uric Acid                      | 15.9 (2.85)a  | 14.5 (2.91)a  |               | 15.9 (3.29)a  | 0.17  | 0.243 |
| 9  | Uridine                        | 15.9 (3.14)a  | 16.4 (2.41)a  |               | 15.7 (1.37)a  | 0.253 | 0.338 |
| 12 | (S)-3,4-Dihydroxybutyric Acid  | 20 (3.31)a    | 17.3 (2.58)a  | 18.7 (1.47)a  | 17.3 (2.57)a  | 0.089 | 0.153 |
| 12 | 2-Hydroxy-3-methylbutyric Acid | 20.8 (1.86)a  | 19.2 (2.38)a  | 20.4 (0.538)a | 19.2 (3.81)a  | 0.082 | 0.146 |
| 12 | 2-Hydroxyadipic Acid           | 18.2 (2.69)a  | 15.6 (1.09)b  | 16.6 (2.64)ab | 16.5 (2.1)ab  | 0.011 | 0.03  |
| 12 | 2-Oxoglutaric Acid             | 14.1 (2.47)a  | 12.1 (1.45)a  | 12.8 (1.21)a  | 13.5 (1.42)a  | 0.13  | 0.203 |
| 12 | 2-Phenylacetic Acid            | 15.2 (2.07)a  | 13.9 (2.65)a  | 13.9 (2)a     | 14.9 (1.91)a  | 0.465 | 0.543 |
| 12 | 3-Dehydroshikimic acid         | 11.3 (3.01)a  | 11.8 (2.58)a  | 11.5 (2.12)a  | 11 (1.08)a    | 0.921 | 0.938 |
| 12 | 3-Hydroxybenzoic Acid          | 10.7 (0.882)a | 10.4 (0.642)a | 10.5 (0.542)a | 10.6 (0.664)a | 0.31  | 0.396 |
| 12 | 3-Hydroxybutyric Acid          | 15.3 (3.13)a  | 13.3 (4.18)a  | 15.4 (2.33)a  | 15.3 (3.74)a  | 0.439 | 0.517 |
| 12 | 3-Methyl-2-oxobutyric Acid     | 15.9 (4.64)a  | 15.4 (3.05)a  | 14.2 (5.52)a  | 15.6 (4.53)a  | 0.515 | 0.59  |
| 12 | 3-Methylthiopropionic Acid     | 13.3 (2.08)a  | 13.2 (3.36)a  | 13.5 (1.47)a  | 14 (2.08)a    | 0.672 | 0.725 |
| 12 | 3-O-Methyl-Gallic Acid         | 15.1 (1.2)a   | 10.5 (3.72)b  | 13.4 (4.93)a  | 16.3 (2.89)a  | <0.01 | <0.01 |
| 12 | 3-Oxoglutaric Acid             | 9.87 (1.82)a  | 9.57 (1.31)a  | 9.51 (2.09)a  | 9.94 (2.49)a  | 0.425 | 0.502 |
| 12 | 3,5-Dihydroxybenzoic Acid      | 17.4 (2.02)a  | 15.1 (1.15)b  | 17.6 (2.88)ac | 15.8 (1.96)bc | <0.01 | <0.01 |
| 12 | 4-Hydroxybenzoic Acid          | 19.1 (1.63)a  | 16.5 (2.03)b  | 18.6 (1.25)ac | 17.7 (2.82)bc | 0.023 | 0.055 |
| 12 | 4-Hydroxyphenylacetic Acid     | 18.1 (3.36)a  | 15.4 (2.23)b  | 18.1 (3.13)a  | 16.2 (1.7)ab  | 0.036 | 0.078 |
| 12 | 4-Methylcatechol               | 10.7 (2.54)ab | 9.52 (1.51)a  | 11.9 (2.6)ab  | 12.4 (5.62)b  | 0.056 | 0.11  |
| 12 | 4-Methylvaleric Acid           | 9.68 (3.92)a  | 9.18 (1.69)a  | 9.91 (1.15)a  | 8.8 (1.41)a   | 0.388 | 0.469 |
| 12 | 5-Phenylvaleric Acid           | 10.6 (1.24)a  | 11.8 (0.708)b | 11.1 (0.58)ab | 11.3 (0.905)b | <0.01 | <0.01 |
| 12 | a-hydroxyisocaproic acid       | 21.3 (2.57)a  | 19.3 (2.63)a  | 21.1 (1.47)a  | 20 (3.57)a    | 0.17  | 0.243 |

On-line Supplementary Material

**Lauren Brink et al. Neonatal diet alters fecal microbiota and metabolome profiles over the first year of life in infants fed breast milk or formula.**

|    |                                        |               |               |               |               |       |       |
|----|----------------------------------------|---------------|---------------|---------------|---------------|-------|-------|
| 12 | Acetoacetic Acid                       | 12.2 (1.43)a  | 11.5 (0.554)a | 11.9 (1.23)a  | 12 (1.72)a    | 0.108 | 0.177 |
| 12 | Adenine                                | 12.2 (2.32)a  | 11.5 (2.25)a  | 12.8 (2.92)a  | 11.3 (0.84)a  | 0.149 | 0.223 |
| 12 | Adipic Acid                            | 16.5 (1.25)a  | 15.9 (1.69)a  | 16.5 (1.58)a  | 17.2 (1.42)a  | 0.106 | 0.174 |
| 12 | Arachidonic Acid                       | 11.7 (3.15)a  | 12 (1.64)a    | 11.3 (2.21)a  | 11.2 (1.87)a  | 0.623 | 0.688 |
| 12 | Argininosuccinic acid                  | 12.6 (1.82)a  | 12 (0.713)a   | 12.1 (1.56)a  | 12.7 (0.925)a | 0.162 | 0.237 |
| 12 | Atrolactic Acid                        | 23.4 (1.44)ab | 22.8 (0.871)c | 24.2 (1.29)a  | 22.8 (1.15)bc | 0.029 | 0.065 |
| 12 | Azelaic Acid                           | 18.6 (1.24)a  | 17.9 (1.82)a  | 18.8 (0.737)a | 20.5 (0.66)b  | <0.01 | 0.015 |
| 12 | Benzoic Acid                           | 12.6 (1.57)a  | 12.5 (1.07)a  | 12 (0.909)a   | 12.3 (0.862)a | 0.318 | 0.403 |
| 12 | Butyric Acid                           | 12.7 (1.55)a  | 11.1 (1.4)b   | 12.4 (1.39)ab | 12.3 (1.41)a  | 0.013 | 0.033 |
| 12 | CA                                     | 22 (0.796)a   | 21.6 (0.709)b | 22.4 (1.16)a  | 21.9 (1.38)ab | 0.013 | 0.033 |
| 12 | Caffeic Acid                           | 14.8 (3.21)a  | 11.5 (3.69)b  | 13.7 (2.46)ab | 13 (1.89)ab   | 0.052 | 0.104 |
| 12 | CDCA                                   | 20.4 (1.73)a  | 19.6 (3.67)a  | 20.7 (1.98)a  | 19 (3.07)a    | 0.259 | 0.344 |
| 12 | cis-11,12-Methylene Pentadecanoic Acid | 6.91 (2.08)a  | 6.49 (0.946)a | 6.61 (1.13)a  | 6.38 (0.5)a   | 0.327 | 0.408 |
| 12 | Citric Acid                            | 13.8 (3.94)a  | 12.3 (3.8)a   | 12.7 (1.43)a  | 12.5 (1.39)a  | 0.495 | 0.57  |
| 12 | Cysteine                               | 13.7 (1.16)a  | 12.4 (1.73)a  | 13.1 (1.16)a  | 13.6 (1.22)a  | 0.156 | 0.231 |
| 12 | DCA                                    | 14.8 (3.58)a  | 20.6 (5.35)ab | 15.4 (7.06)ab | 20.6 (5.8)b   | 0.081 | 0.145 |
| 12 | Dihydro-Isoferulic acid-glucuronide    | 11.1 (1.24)a  | 10.6 (0.66)a  | 11.3 (0.822)a | 10.7 (1.31)a  | 0.265 | 0.351 |
| 12 | Dihydrocaffeic acid                    | 19.2 (4.97)a  | 15.5 (2.67)a  | 19.5 (3.28)a  | 16.7 (5.12)a  | 0.095 | 0.161 |
| 12 | Dihydroferulic Acid                    | 16.7 (2.25)a  | 14.2 (1.01)b  | 17.5 (1.59)a  | 16.2 (2.64)a  | <0.01 | <0.01 |
| 12 | Dihydroferulic Acid-4-Sulfate          | 10 (3.3)a     | 9.07 (3.33)a  | 8.89 (2.6)a   | 7.94 (1.64)a  | 0.354 | 0.437 |
| 12 | Dodecanedioic Acid                     | 14.3 (1.13)a  | 14.2 (1.4)a   | 14.7 (1.7)a   | 14.7 (1.34)a  | 0.899 | 0.928 |
| 12 | Fumaric Acid                           | 14.1 (1.75)a  | 13.9 (2.05)a  | 13.7 (1.16)a  | 13.8 (1.05)a  | 0.929 | 0.941 |
| 12 | GCA                                    | 17.7 (2.79)a  | 15.5 (1.81)b  | 19.6 (3.64)a  | 15.6 (1.84)b  | <0.01 | <0.01 |
| 12 | GCDCA                                  | 17.1 (2.62)a  | 15 (2.09)b    | 18 (4.55)a    | 15.1 (2.17)b  | <0.01 | 0.016 |
| 12 | GDCA                                   | 9.62 (2.03)a  | 12.2 (4.66)a  | 11.9 (7.13)a  | 13.2 (6.12)a  | 0.088 | 0.153 |

On-line Supplementary Material

**Lauren Brink et al. Neonatal diet alters fecal microbiota and metabolome profiles over the first year of life in infants fed breast milk or formula.**

|    |                                     |                |               |               |                |       |       |
|----|-------------------------------------|----------------|---------------|---------------|----------------|-------|-------|
| 12 | Gentisic acid                       | 13.8 (2.08)a   | 12.8 (2.47)a  | 14.7 (1.9)a   | 13.9 (1.8)a    | 0.255 | 0.341 |
| 12 | Gluconic Acid                       | 18.1 (3.89)a   | 16 (2.89)a    | 16.6 (1.08)a  | 16.4 (2.54)a   | 0.101 | 0.169 |
| 12 | glucose                             | 20.1 (0.917)ab | 19.8 (1.37)a  | 20.6 (1.26)b  | 19.8 (0.944)ab | 0.117 | 0.188 |
| 12 | GUDCA                               | 14.8 (1.69)ab  | 12.9 (2.15)c  | 16.4 (3.74)a  | 13.3 (1.89)bc  | <0.01 | 0.012 |
| 12 | Hexadecanedioic Acid                | 12.5 (1.5)a    | 13.3 (1.27)a  | 12.7 (0.899)a | 12.3 (1.73)a   | 0.444 | 0.521 |
| 12 | Hexadecanoic acid                   | 11.1 (1.11)a   | 10.8 (0.605)a | 11 (0.558)a   | 10.7 (0.25)a   | 0.081 | 0.145 |
| 12 | Homovanillic Acid                   | 13.2 (1.38)a   | 11.6 (2.39)a  | 13.6 (2.04)a  | 12.6 (1.82)a   | 0.289 | 0.375 |
| 12 | Hydrocinnamic Acid                  | 12.2 (4.75)a   | 11.9 (3.66)a  | 12.9 (2.19)a  | 11.6 (2.83)a   | 0.289 | 0.375 |
| 12 | Hydroxyphenyllactic Acid            | 21.4 (3.65)a   | 16.9 (3.09)b  | 18.6 (0.768)b | 18.9 (3.45)ab  | 0.035 | 0.078 |
| 12 | Indole-2-Carboxylic Acid            | 10.8 (4.9)a    | 12.6 (4.79)a  | 11.5 (3.54)a  | 10.5 (1.42)a   | 0.324 | 0.407 |
| 12 | Indole-3-Carboxaldehyde             | 15.5 (2.28)a   | 15.7 (1.95)a  | 14.4 (2.35)a  | 15.6 (1.65)a   | 0.73  | 0.774 |
| 12 | Isocitric Acid                      | 12.2 (0.824)a  | 13.1 (2.16)ab | 12.9 (2.39)ab | 14.3 (0.788)b  | 0.012 | 0.031 |
| 12 | Isoferulic Acid 3-o-Sulfate         | 14.9 (6.13)a   | 12 (4.32)a    | 13.1 (6.11)a  | 10.6 (4.43)a   | 0.133 | 0.205 |
| 12 | Isoleucine                          | 17.3 (1.71)a   | 18.9 (3.78)a  | 18.8 (2.93)a  | 18.6 (2.24)a   | 0.665 | 0.72  |
| 12 | L(-)-Malic acid                     | 18.6 (2.43)a   | 18.1 (2.05)a  | 19.8 (3.23)a  | 19.4 (1.21)a   | 0.132 | 0.205 |
| 12 | Lactic Acid                         | 18.8 (1.08)a   | 18.5 (5.26)a  | 18.9 (2.06)a  | 17.6 (1.57)a   | 0.361 | 0.443 |
| 12 | Leucine                             | 18.1 (1.42)a   | 18.8 (2.75)ab | 20 (1.76)b    | 18.6 (1.33)ab  | 0.119 | 0.19  |
| 12 | m-Coumaric Acid                     | 9.88 (0.8)ab   | 9.58 (1.08)ab | 9.4 (0.692)a  | 10.8 (1.91)b   | 0.066 | 0.127 |
| 12 | m-hydroxy-hydrocinnamic acid        | 19.2 (3.67)a   | 15.9 (3.88)b  | 18.2 (3.02)ab | 16.6 (4.32)ab  | 0.066 | 0.126 |
| 12 | Maleic Acid                         | 11.8 (0.688)a  | 11.4 (0.995)a | 11.8 (0.913)a | 12.5 (1.8)a    | 0.141 | 0.215 |
| 12 | Methyl-2-oxovaleric Acid            | 18.8 (3.86)a   | 17.3 (3.27)a  | 16.4 (4.4)a   | 17.9 (4.06)a   | 0.923 | 0.938 |
| 12 | Methyl- $\alpha$ -D-Glucopyranoside | 18.8 (2.62)a   | 15.5 (2.25)b  | 17.6 (3.49)ab | 16 (2.09)ab    | 0.027 | 0.062 |
| 12 | Methyl Vanillate                    | 11 (1.68)a     | 9.08 (0.957)b | 10.1 (1.54)ab | 9.39 (1.67)ab  | <0.01 | 0.024 |
| 12 | Methylmalonic Acid                  | 14 (2.23)ab    | 12.8 (1.89)a  | 13 (3.29)ab   | 15.2 (1.14)b   | 0.088 | 0.153 |
| 12 | Mevalonic Acid                      | 13.6 (1.78)a   | 12.8 (1.87)a  | 12.9 (1.26)a  | 12.6 (1.76)a   | 0.534 | 0.603 |
| 12 | o-Hydroxyhippuric acid              | 9.68 (2.15)a   | 9.9 (3.2)a    | 10.1 (1.21)a  | 9.31 (1.47)a   | 0.23  | 0.314 |

On-line Supplementary Material

**Lauren Brink et al. Neonatal diet alters fecal microbiota and metabolome profiles over the first year of life in infants fed breast milk or formula.**

|    |                       |               |                |                |               |       |       |
|----|-----------------------|---------------|----------------|----------------|---------------|-------|-------|
| 12 | O-Phospho-L-serine    | 8.33 (1.42)a  | 8.54 (1.47)a   | 8.44 (1.97)a   | 10.1 (1.67)a  | 0.155 | 0.231 |
| 12 | Octadecanedioic Acid  | 13.2 (2.09)a  | 13.6 (2.01)a   | 14 (2.08)a     | 12.5 (1.94)a  | 0.618 | 0.684 |
| 12 | Octadecanoic acid     | 10.4 (0.694)a | 10.4 (0.7)a    | 10.6 (0.349)a  | 10.4 (0.437)a | 0.392 | 0.472 |
| 12 | Orotic Acid           | 16.5 (1.83)a  | 16.3 (4.57)a   | 16.6 (3.34)a   | 16.5 (2.64)a  | 0.933 | 0.943 |
| 12 | Oxamic Acid           | 12.8 (3.1)ab  | 12.3 (1.61)ab  | 13.7 (1.32)a   | 11.8 (1.28)b  | 0.038 | 0.082 |
| 12 | p-Coumaric acid       | 15.8 (2.93)a  | 15.1 (2.44)a   | 16.4 (2.18)a   | 14.6 (1.55)a  | 0.144 | 0.218 |
| 12 | Phenol                | 8.75 (3.39)a  | 10.4 (3.73)a   | 8.3 (3.33)a    | 11.1 (3.95)a  | 0.315 | 0.401 |
| 12 | Pimelic Acid          | 16 (0.964)a   | 15.2 (1.52)a   | 15.5 (1.05)a   | 16.1 (1.89)a  | 0.169 | 0.243 |
| 12 | Pyrocatechol          | 16.2 (1.86)a  | 14.3 (1.42)b   | 15.6 (2.86)a   | 17 (2.32)a    | <0.01 | <0.01 |
| 12 | Pyrogallol            | 10.5 (2.69)a  | 10.1 (1.99)a   | 10.6 (2.49)a   | 11.9 (4.18)a  | 0.6   | 0.668 |
| 12 | Pyruvic acid          | 14.6 (2.65)a  | 13 (2.31)ab    | 12.7 (2.43)b   | 13.9 (1.44)ab | 0.071 | 0.131 |
| 12 | Quercetin             | 9.22 (3.58)a  | 8.53 (1.66)a   | 8.24 (1.21)a   | 8.29 (0.835)a | 0.3   | 0.386 |
| 12 | Quinic Acid           | 19 (1.45)a    | 16.9 (1.75)b   | 18.3 (0.836)ab | 18.5 (1.9)ab  | <0.01 | 0.018 |
| 12 | Raffinose             | 18 (1.04)ab   | 17.7 (1.56)a   | 18.4 (1.07)b   | 17.6 (1.94)a  | 0.035 | 0.077 |
| 12 | Rutin                 | 6.45 (2.97)a  | 6.03 (0.866)a  | 6.41 (1.62)a   | 6.15 (1.33)a  | 0.206 | 0.289 |
| 12 | Shikimic Acid         | 13.6 (1.39)a  | 12.9 (1.68)a   | 14 (0.714)a    | 13.3 (2.95)a  | 0.32  | 0.404 |
| 12 | Stercobilin           | 7.07 (0.895)a | 6.66 (2.45)a   | 6.84 (0.82)a   | 6.91 (0.539)a | 0.801 | 0.845 |
| 12 | Succinic Acid         | 19.7 (2.75)ab | 20.1 (4.17)a   | 19.9 (4.52)ab  | 24.2 (4.13)b  | 0.08  | 0.145 |
| 12 | Sucrose               | 20.1 (1.02)ab | 19.4 (2.09)a   | 20.9 (0.798)b  | 19.9 (1.6)ab  | 0.04  | 0.084 |
| 12 | TCDCA                 | 14.5 (3.01)ab | 10.3 (2.61)c   | 15.8 (2.91)a   | 13.1 (3.56)b  | <0.01 | <0.01 |
| 12 | TDCA                  | 10.9 (1.93)ab | 10.4 (2.66)a   | 12.8 (0.831)b  | 11.3 (3.64)ab | 0.088 | 0.153 |
| 12 | Tetradecanedioic Acid | 13.4 (1.06)ab | 13.4 (0.944)ab | 13.8 (0.93)a   | 13 (0.588)b   | 0.068 | 0.13  |
| 12 | Tyrosol               | 16.8 (2.91)a  | 15.7 (3.22)a   | 17.3 (2.84)a   | 17.2 (5.4)a   | 0.245 | 0.33  |
| 12 | Undecanedioic Acid    | 15.6 (1.19)a  | 15.9 (1.79)a   | 15.7 (1.21)a   | 15.6 (2.02)a  | 0.877 | 0.911 |
| 12 | Uric Acid             | 14.7 (1.86)a  | 17.3 (4.81)a   | 16.6 (2.28)a   | 16 (2.93)a    | 0.222 | 0.307 |
| 12 | Uridine               | 15.4 (2.07)a  | 15.3 (1.57)a   | 15 (3.04)a     | 16.9 (2.32)a  | 0.09  | 0.154 |

On-line Supplementary Material

**Lauren Brink et al. Neonatal diet alters fecal microbiota and metabolome profiles over the first year of life in infants fed breast milk or formula.**

<sup>1</sup> Data are log transformed peak areas and presented as median (25<sup>th</sup> quartile, 75<sup>th</sup> quartile). Differences in diet were assessed by Kruskal-Wallis test on percent abundances. Post-hoc analysis of pairwise differences in diet were assessed by Dunn's test. Medians without a common letter differ. FDR calculated by Benjamini and Hochberg false discovery rate procedure. BF = Breast-fed, MF = milk formula fed, NLB = no longer breastfeeding, SF = soy formula fed.

On-line Supplementary Material

**Lauren Brink et al. Neonatal diet alters fecal microbiota and metabolome profiles over the first year of life in infants fed breast milk or formula.**

**Supplementary Table 5:** Dietary differences in fecal metabolites (Positive Mode) from infants at three, six, nine, and 12 months of age.<sup>1</sup>

| Age | Metabolite                  | BF            | MF            | NLB | SF            | P-value | FDR   |
|-----|-----------------------------|---------------|---------------|-----|---------------|---------|-------|
| 3   | (-)-Epicatechin             | 9.3 (1.45)ab  | 9.75 (1.96)a  |     | 8.88 (0.637)b | 0.07    | 0.14  |
| 3   | 1-Methylhydantoin           | 17.4 (2.28)a  | 18.1 (2.81)a  |     | 16.2 (4.01)a  | 0.092   | 0.171 |
| 3   | 1-Methyluric Acid           | 19.9 (1.15)a  | 16.2 (1.49)b  |     | 15.9 (1.19)b  | <0.01   | <0.01 |
| 3   | 2-Aminophenol               | 14.3 (0.973)a | 17.5 (0.914)b |     | 14.8 (0.908)c | <0.01   | <0.01 |
| 3   | 2-Phenylacetamide           | 12.3 (0.834)a | 12.4 (1.01)a  |     | 12.6 (1.99)a  | 0.938   | 0.956 |
| 3   | 3-Methylxanthine            | 15.9 (2.31)a  | 11.2 (0.115)b |     | 10.8 (0.668)b | <0.01   | <0.01 |
| 3   | 4-Hydroxyphenylpyruvic Acid | 11.6 (2.74)a  | 10.9 (0.906)a |     | 15.9 (3.72)b  | <0.01   | <0.01 |
| 3   | 4-Imidazoleacetic Acid      | 14.8 (2.07)a  | 16 (2.4)a     |     | 15.9 (3.11)a  | 0.178   | 0.28  |
| 3   | 4-Imidazoleacrylic Acid     | 20.1 (1.4)a   | 21.5 (1.31)ab |     | 22.3 (1.14)b  | 0.02    | 0.055 |
| 3   | 4-Imidazolecarboxylic Acid  | 15.3 (0.677)a | 14.6 (1.1)b   |     | 14.5 (1.09)b  | 0.013   | 0.038 |
| 3   | 4-Oxoproline                | 22.8 (2.99)a  | 23.9 (0.82)a  |     | 23.3 (1.14)a  | 0.305   | 0.416 |
| 3   | 4-Pyridoxic acid            | 17.8 (1.46)a  | 20 (0.601)b   |     | 17.6 (0.961)a | <0.01   | <0.01 |
| 3   | 5-Aminovaleric Acid         | 23.4 (6.86)a  | 23.4 (1.46)a  |     | 24.2 (1.93)a  | 0.207   | 0.309 |
| 3   | 5-Hydroxylysine             | 14.7 (1.69)a  | 15.4 (1.85)a  |     | 14.4 (1.28)a  | 0.112   | 0.194 |
| 3   | 5-Hydroxytryptamine         | 12.8 (2.79)a  | 12.1 (1.49)a  |     | 15.4 (3.64)a  | 0.104   | 0.188 |
| 3   | 6-Hydroxydopamine           | 17.5 (1.19)a  | 16.9 (0.691)a |     | 16.6 (1.01)a  | 0.109   | 0.191 |
| 3   | Acetic Acid                 | 22.2 (1.48)a  | 22.9 (1.67)a  |     | 22.5 (2.14)a  | 0.542   | 0.648 |
| 3   | Acetylmuramic Acid          | 19.4 (1.83)a  | 19.2 (1.02)a  |     | 20.4 (1.17)b  | 0.034   | 0.08  |
| 3   | Arginine                    | 16.9 (2.11)a  | 16.2 (0.851)a |     | 19 (1.62)b    | <0.01   | 0.017 |
| 3   | Asparagine                  | 16.4 (0.73)a  | 16.1 (0.327)a |     | 17 (1.28)a    | 0.167   | 0.267 |
| 3   | Aspartic Acid               | 20.6 (2.11)a  | 21.1 (1.28)a  |     | 21.4 (1.46)a  | 0.109   | 0.191 |



On-line Supplementary Material

**Lauren Brink et al. Neonatal diet alters fecal microbiota and metabolome profiles over the first year of life in infants fed breast milk or formula.**

|   |                                               |               |               |  |               |       |       |
|---|-----------------------------------------------|---------------|---------------|--|---------------|-------|-------|
| 3 | b-Alanine                                     | 16.6 (1.33)a  | 17.6 (0.92)a  |  | 17.5 (2.35)a  | 0.286 | 0.396 |
| 3 | Betaine                                       | 23.5 (1.08)a  | 21.7 (2.35)b  |  | 20.7 (2.6)b   | <0.01 | 0.018 |
| 3 | C18-Carnitine                                 | 17.7 (3.38)a  | 12.7 (3.72)b  |  | 13.5 (2.95)b  | <0.01 | 0.023 |
| 3 | Caffeine                                      | 16.5 (1.15)a  | 10.1 (1.27)b  |  | 10.4 (1.18)b  | <0.01 | <0.01 |
| 3 | cis-11,12-Methylene<br>Pentadecanoylcarnitine | 18 (3.34)a    | 13.9 (2.6)b   |  | 14.9 (2.15)b  | 0.023 | 0.06  |
| 3 | Citrulline                                    | 21.4 (2.84)a  | 22.2 (1.57)ab |  | 22.5 (1.39)b  | 0.095 | 0.173 |
| 3 | Creatine                                      | 23.5 (2.73)a  | 18.6 (3.73)a  |  | 20.2 (6.87)a  | 0.092 | 0.171 |
| 3 | Creatinine                                    | 19.5 (4.08)a  | 18.3 (1.55)a  |  | 16.3 (3.11)b  | <0.01 | 0.02  |
| 3 | Cyclohexanecarboxylic Acid                    | 12.9 (1.27)a  | 13 (0.76)a    |  | 12.5 (1.02)a  | 0.645 | 0.733 |
| 3 | Cystathionine                                 | 13.9 (1.84)a  | 13.8 (1.2)a   |  | 13.4 (0.873)a | 0.704 | 0.773 |
| 3 | Cystine                                       | 17.5 (0.829)a | 15.6 (1.54)b  |  | 14.8 (0.589)c | <0.01 | <0.01 |
| 3 | D-2-Aminobutyric Acid                         | 20.9 (1.47)a  | 21.2 (1.3)a   |  | 20.6 (0.795)a | 0.617 | 0.713 |
| 3 | D-Sphingosine                                 | 19.2 (2.34)a  | 16.1 (1.56)b  |  | 16.8 (2.04)b  | <0.01 | <0.01 |
| 3 | D6-trans-Cinnamic Acid                        | 16.3 (0.407)a | 16.3 (0.258)a |  | 15.3 (0.297)b | <0.01 | <0.01 |
| 3 | DL-3-aminoisobutyric acid                     | 20.9 (2.77)a  | 20.5 (2.28)a  |  | 20.1 (2.82)a  | 0.765 | 0.826 |
| 3 | DL-Tryptophan                                 | 23 (1.88)a    | 22.9 (1.11)a  |  | 22.9 (1.65)a  | 0.879 | 0.912 |
| 3 | Dopamine                                      | 14.8 (1.22)a  | 17.4 (0.901)b |  | 16.6 (0.617)b | <0.01 | <0.01 |
| 3 | Ectoine                                       | 14.1 (1.4)a   | 13.9 (0.56)a  |  | 14.1 (1.15)a  | 0.798 | 0.852 |
| 3 | Equol                                         | 9.03 (0.728)a | 8.89 (0.315)a |  | 9.14 (0.582)a | 0.666 | 0.748 |
| 3 | Ergothioneine                                 | 16.2 (1.89)a  | 14.5 (0.882)b |  | 14.3 (0.94)b  | <0.01 | 0.02  |
| 3 | Ethanolamine                                  | 18 (1.39)a    | 16.8 (1.5)b   |  | 14.9 (1.52)c  | <0.01 | <0.01 |
| 3 | Ferulic Acid                                  | 11.1 (0.805)a | 13.1 (1.42)b  |  | 13.7 (3.45)b  | <0.01 | <0.01 |
| 3 | Galactitol                                    | 19.1 (2.12)a  | 22.3 (1.78)b  |  | 16.6 (1.09)c  | <0.01 | <0.01 |

On-line Supplementary Material

**Lauren Brink et al. Neonatal diet alters fecal microbiota and metabolome profiles over the first year of life in infants fed breast milk or formula.**

|   |                         |               |               |  |               |       |       |
|---|-------------------------|---------------|---------------|--|---------------|-------|-------|
| 3 | Genistein               | 9.74 (2.14)a  | 9.68 (2.45)a  |  | 15.1 (3.56)b  | <0.01 | <0.01 |
| 3 | Glutamic Acid           | 24.8 (2.77)a  | 25.6 (0.825)a |  | 24.9 (1.07)a  | 0.321 | 0.431 |
| 3 | Glutamine               | 20.7 (1.46)a  | 20.5 (2.4)a   |  | 20.6 (1.21)a  | 0.725 | 0.793 |
| 3 | Glutaric Acid           | 14.8 (1.65)ab | 14.5 (0.597)a |  | 15.2 (1.38)b  | 0.045 | 0.099 |
| 3 | Glycine                 | 21.4 (1.01)a  | 20.3 (2.29)a  |  | 19.8 (1.23)b  | <0.01 | 0.017 |
| 3 | Glycitein               | 9.86 (1.91)a  | 8.56 (0.222)b |  | 14.2 (4.38)c  | <0.01 | <0.01 |
| 3 | Hexanoic Acid           | 10.1 (3.56)a  | 12.2 (3.77)a  |  | 11.7 (1.8)a   | 0.577 | 0.682 |
| 3 | Histidine               | 20.3 (1.74)a  | 20.1 (3.33)a  |  | 18.4 (1.07)b  | <0.01 | 0.028 |
| 3 | Imidazolepropionic Acid | 19.7 (3.6)a   | 22.2 (1.22)b  |  | 21.9 (1.93)ab | 0.063 | 0.13  |
| 3 | Indole-3-Acetic Acid    | 15 (2.79)a    | 16.7 (1.67)a  |  | 19 (3.05)b    | <0.01 | <0.01 |
| 3 | Indole-3-Lactic Acid    | 21.9 (2.57)a  | 22.7 (2.03)a  |  | 17.6 (1.93)b  | <0.01 | <0.01 |
| 3 | Indole-3-Propionic Acid | 12 (1.68)a    | 13.3 (4.79)ab |  | 16.7 (1.99)b  | <0.01 | 0.03  |
| 3 | Inosine                 | 16 (3.19)a    | 17.1 (2.73)a  |  | 17.5 (1.4)a   | 0.559 | 0.664 |
| 3 | Isobutyric Acid         | 16.5 (2.43)a  | 18.9 (1.18)b  |  | 19.5 (0.939)b | <0.01 | <0.01 |
| 3 | Isovaleric Acid         | 11.9 (2.17)a  | 16 (1.59)b    |  | 17.3 (1.04)c  | <0.01 | <0.01 |
| 3 | Jasmonic acid           | 14 (1.14)a    | 14.4 (0.432)a |  | 17.4 (1.92)b  | <0.01 | <0.01 |
| 3 | Kynurenic Acid          | 21.9 (1.98)a  | 19.5 (1.12)b  |  | 20 (1.01)b    | <0.01 | <0.01 |
| 3 | L-Carnitine             | 20.7 (1.35)a  | 20.2 (1.53)a  |  | 19.4 (1.4)b   | 0.014 | 0.041 |
| 3 | L-DOPA                  | 11.8 (1.15)a  | 14 (0.97)b    |  | 12.6 (1.2)a   | <0.01 | <0.01 |
| 3 | L-Kynurenine            | 15.8 (1.12)a  | 16 (0.477)a   |  | 15.9 (0.969)a | 0.929 | 0.949 |
| 3 | L-Phenylalanine         | 25.6 (2.01)a  | 25.6 (1.12)a  |  | 25.2 (1.4)a   | 0.652 | 0.739 |
| 3 | L-Pipecolic Acid        | 21.1 (2.65)a  | 24.8 (2.2)b   |  | 23 (0.865)c   | <0.01 | <0.01 |
| 3 | L-Pyroglutamic Acid     | 23.6 (1.85)a  | 24.5 (1.95)a  |  | 22.4 (3.63)a  | 0.166 | 0.267 |
| 3 | L-Saccharophine         | 14.5 (1.91)a  | 15.5 (1.03)a  |  | 14.9 (1.23)a  | 0.168 | 0.267 |

On-line Supplementary Material

**Lauren Brink et al. Neonatal diet alters fecal microbiota and metabolome profiles over the first year of life in infants fed breast milk or formula.**

|   |                                                                 |                |               |  |               |       |       |
|---|-----------------------------------------------------------------|----------------|---------------|--|---------------|-------|-------|
| 3 | Lysine                                                          | 20.2 (2.21)a   | 22.1 (0.978)b |  | 20.9 (1.1)a   | 0.011 | 0.033 |
| 3 | m-Hydroxy-Hydrocinnamic Acid                                    | 10.8 (1.42)a   | 10.8 (1.08)a  |  | 14.3 (3.54)b  | <0.01 | <0.01 |
| 3 | Methionine                                                      | 24.1 (2.22)a   | 23.9 (0.525)a |  | 23.7 (1.27)a  | 0.667 | 0.748 |
| 3 | Myo-Inositol                                                    | 21.3 (1.36)a   | 19.1 (1.55)b  |  | 18.8 (0.721)b | <0.01 | <0.01 |
| 3 | N-Acetylneuraminic Acid                                         | 22.4 (2.28)a   | 18.1 (1.37)b  |  | 19.2 (6.14)ab | 0.097 | 0.176 |
| 3 | N-Cinnamylglycine                                               | 12.4 (1.44)a   | 12.7 (1.32)a  |  | 11 (0.47)b    | <0.01 | <0.01 |
| 3 | N-Methylhistidine                                               | 15.7 (4.06)a   | 18.1 (2.98)b  |  | 15.1 (3.52)a  | 0.041 | 0.094 |
| 3 | N <sup>2</sup> -Acetylhistamine                                 | 17.5 (2.93)a   | 18.2 (1.01)ab |  | 19.6 (1.83)b  | 0.029 | 0.071 |
| 3 | N <sup>2</sup> ,N <sup>2</sup> ,N <sup>2</sup> -Trimethyllysine | 13.5 (1.74)a   | 16 (1.32)a    |  | 20.1 (2.08)b  | <0.01 | <0.01 |
| 3 | N <sup>1</sup> ,N <sup>12</sup> -Diacetylspermine               | 14.1 (1.63)a   | 13.8 (1.53)a  |  | 12.1 (3.4)b   | 0.031 | 0.074 |
| 3 | Neopterin                                                       | 16 (1.03)a     | 14.3 (1.35)b  |  | 14.5 (1.56)b  | <0.01 | <0.01 |
| 3 | Nicotinamide                                                    | 14.9 (3.07)a   | 15.4 (3.29)a  |  | 14.4 (2.46)a  | 0.696 | 0.766 |
| 3 | Nicotinic Acid                                                  | 23.3 (1.35)a   | 23.5 (1.89)a  |  | 23.7 (2.84)a  | 0.914 | 0.938 |
| 3 | Oleic acid                                                      | 14.8 (1.8)a    | 14.5 (2.26)a  |  | 16.2 (4.67)a  | 0.188 | 0.288 |
| 3 | Ornithine                                                       | 17.4 (1.52)a   | 17.1 (1.31)a  |  | 15.5 (1.54)b  | 0.01  | 0.032 |
| 3 | p-Aminobenzoic Acid                                             | 14.7 (0.22)a   | 13.6 (2.14)b  |  | 13.6 (1.55)ab | 0.033 | 0.079 |
| 3 | Palmitoylcarnitine                                              | 19.1 (3.38)a   | 15.7 (2.22)b  |  | 15.7 (2.42)b  | <0.01 | 0.031 |
| 3 | Phenylacetic Acid                                               | 12.6 (0.677)a  | 13.3 (1.26)a  |  | 15.6 (0.523)b | <0.01 | <0.01 |
| 3 | Phenylacetylglycine                                             | 10.7 (0.765)a  | 15.6 (1.54)b  |  | 12.9 (2.96)c  | <0.01 | <0.01 |
| 3 | Phloretic Acid                                                  | 11.6 (0.975)ab | 11.2 (1.21)a  |  | 11.8 (0.577)b | 0.076 | 0.15  |
| 3 | Piperine                                                        | 8.42 (0.383)a  | 8.17 (0.666)a |  | 8.99 (0.64)b  | 0.039 | 0.089 |
| 3 | Proline                                                         | 25.4 (1.92)a   | 24.9 (1.67)a  |  | 23.8 (1.49)b  | <0.01 | 0.022 |
| 3 | Propionic Acid                                                  | 19.5 (1.69)a   | 22.1 (1.05)b  |  | 22.3 (1.47)b  | <0.01 | 0.014 |
| 3 | Protocatechuic Acid                                             | 12.6 (2.24)a   | 11.7 (0.584)a |  | 14.8 (2.09)b  | <0.01 | <0.01 |

On-line Supplementary Material

**Lauren Brink et al. Neonatal diet alters fecal microbiota and metabolome profiles over the first year of life in infants fed breast milk or formula.**

|   |                        |               |                |  |               |       |       |
|---|------------------------|---------------|----------------|--|---------------|-------|-------|
| 3 | Putrescine             | 20.1 (2.53)a  | 20.4 (1.35)a   |  | 20 (1.52)a    | 0.796 | 0.852 |
| 3 | Ralgin                 | 11.6 (1.2)a   | 11.3 (0.202)ab |  | 11.1 (0.511)b | <0.01 | 0.013 |
| 3 | Riboflavin             | 18.6 (0.519)a | 18.2 (0.553)a  |  | 17.6 (1.03)b  | <0.01 | 0.012 |
| 3 | sarcosine              | 24.5 (1.37)a  | 24 (0.589)a    |  | 22.5 (1.54)b  | <0.01 | <0.01 |
| 3 | Sebacic Acid           | 14.4 (0.684)a | 14.7 (0.487)a  |  | 15.8 (0.512)b | <0.01 | <0.01 |
| 3 | Serine                 | 20.9 (1.19)a  | 20.6 (0.53)ab  |  | 19.6 (1.37)b  | <0.01 | 0.02  |
| 3 | Sinapinic Acid         | 11.4 (2.24)a  | 11.2 (0.889)a  |  | 12.4 (3.07)a  | 0.312 | 0.423 |
| 3 | Skatole                | 9.26 (0.694)a | 9.02 (0.27)a   |  | 10.5 (0.76)b  | <0.01 | 0.019 |
| 3 | Spermidine             | 18.1 (3.7)a   | 20 (2.72)a     |  | 18.7 (1.89)a  | 0.186 | 0.286 |
| 3 | Spermine               | 12.3 (1.32)a  | 12.1 (0.756)a  |  | 12 (1.96)a    | 0.551 | 0.658 |
| 3 | Stachydrine            | 15.1 (1.43)a  | 17.1 (2.47)b   |  | 16.2 (2.44)ab | 0.039 | 0.089 |
| 3 | Syringic Acid          | 10.9 (0.663)a | 11.6 (0.946)a  |  | 17.6 (2.37)b  | <0.01 | <0.01 |
| 3 | Taurine                | 21.4 (0.965)a | 21.4 (0.914)a  |  | 22 (1.48)a    | 0.526 | 0.634 |
| 3 | trans-4-Hydroxyproline | 19.2 (1.5)a   | 18.3 (0.83)b   |  | 18.3 (1.06)b  | 0.013 | 0.037 |
| 3 | trans-Cinnamic Acid    | 12 (0.93)a    | 12 (1.02)a     |  | 12.1 (1.46)a  | 0.5   | 0.608 |
| 3 | Trigonelline           | 23.3 (0.947)a | 19.9 (0.769)b  |  | 19.3 (2.09)b  | <0.01 | <0.01 |
| 3 | Trimethylamine-N-oxide | 17.5 (1.71)a  | 17.2 (1.34)a   |  | 14.9 (1.61)b  | <0.01 | 0.029 |
| 3 | Tyrosine               | 23.4 (1.8)a   | 23.7 (0.981)a  |  | 23.6 (1.32)a  | 0.991 | 0.995 |
| 3 | Uracil                 | 22.3 (1.45)a  | 21.9 (0.831)a  |  | 21.5 (1.33)a  | 0.266 | 0.38  |
| 3 | Uric Acid              | 19.3 (5.13)a  | 14.6 (1.15)b   |  | 15.3 (2.26)b  | <0.01 | <0.01 |
| 3 | Urobilin               | 23.2 (6.13)a  | 22.9 (1.31)a   |  | 24.2 (1.44)b  | 0.035 | 0.081 |
| 3 | Urobilinogen           | 18.7 (8.81)a  | 20.8 (3.49)a   |  | 23 (1.83)b    | <0.01 | 0.015 |
| 3 | Valeric Acid           | 10.8 (2.08)a  | 13.2 (4.18)b   |  | 13.1 (1.17)b  | <0.01 | 0.014 |
| 3 | Valine                 | 24.9 (2.24)a  | 24.8 (1.51)a   |  | 23.5 (1.32)a  | 0.175 | 0.276 |

On-line Supplementary Material

**Lauren Brink et al. Neonatal diet alters fecal microbiota and metabolome profiles over the first year of life in infants fed breast milk or formula.**

|   |                             |               |               |  |               |       |       |
|---|-----------------------------|---------------|---------------|--|---------------|-------|-------|
| 3 | y-Glutamylphenylalanine     | 15.5 (2.54)a  | 15.3 (1.01)a  |  | 15.6 (1.21)a  | 0.994 | 0.995 |
| 6 | (-)-Epicatechin             | 10.6 (2.98)a  | 9.54 (1.7)a   |  | 8.96 (0.393)b | <0.01 | 0.026 |
| 6 | 1-Methylhydantoin           | 17.9 (4.01)a  | 17.4 (2)a     |  | 14.3 (3.69)b  | <0.01 | <0.01 |
| 6 | 1-Methyluric Acid           | 19.5 (1.81)a  | 15.7 (0.991)b |  | 16.3 (1.92)c  | <0.01 | <0.01 |
| 6 | 2-Aminophenol               | 14.5 (0.714)a | 16.9 (2.22)b  |  | 15.5 (1.15)c  | <0.01 | <0.01 |
| 6 | 2-Phenylacetamide           | 12.6 (0.698)a | 12.9 (1.44)a  |  | 12.7 (1.03)a  | 0.815 | 0.861 |
| 6 | 3-Methylxanthine            | 15.7 (1.41)a  | 11.4 (0.628)b |  | 10.7 (0.629)c | <0.01 | <0.01 |
| 6 | 4-Hydroxyphenylpyruvic Acid | 11.5 (2.6)a   | 11.1 (1.27)a  |  | 14.1 (3.18)b  | <0.01 | <0.01 |
| 6 | 4-Imidazoleacetic Acid      | 15.1 (1.79)a  | 15.2 (0.852)a |  | 15.1 (1.13)a  | 0.538 | 0.647 |
| 6 | 4-Imidazoleacrylic Acid     | 21.1 (1.17)a  | 22.2 (1.28)b  |  | 22.1 (0.945)b | <0.01 | 0.02  |
| 6 | 4-Imidazolecarboxylic Acid  | 15.4 (0.875)a | 14.6 (0.867)b |  | 14.7 (1.69)b  | 0.01  | 0.031 |
| 6 | 4-Oxoproline                | 23.2 (1.22)ab | 22.9 (0.56)a  |  | 23.3 (0.992)b | 0.081 | 0.157 |
| 6 | 4-Pyridoxic acid            | 18.1 (1.12)a  | 20 (1.09)b    |  | 18.5 (0.698)a | <0.01 | <0.01 |
| 6 | 5-Aminovaleric Acid         | 23.4 (5.05)a  | 23.9 (2.4)a   |  | 23.7 (2.32)a  | 0.97  | 0.982 |
| 6 | 5-Hydroxylysine             | 14.7 (0.875)a | 15 (1.37)a    |  | 14.5 (0.906)a | 0.626 | 0.718 |
| 6 | 5-Hydroxytryptamine         | 11.3 (3.27)a  | 13.9 (2.18)b  |  | 16.3 (1.97)c  | <0.01 | <0.01 |
| 6 | 6-Hydroxydopamine           | 18.5 (1.82)a  | 17.6 (1.99)a  |  | 17.6 (1.69)a  | 0.263 | 0.376 |
| 6 | Acetic Acid                 | 22 (1.48)a    | 23 (0.996)b   |  | 22.8 (1.05)b  | 0.028 | 0.071 |
| 6 | Acetylmuramic Acid          | 19.5 (2.63)a  | 19.8 (1.93)a  |  | 19.7 (0.754)a | 0.851 | 0.893 |
| 6 | Arginine                    | 17.7 (2.02)a  | 18 (2.64)a    |  | 18.7 (2.25)a  | 0.233 | 0.342 |
| 6 | Asparagine                  | 16.8 (2.23)a  | 15.5 (2.13)a  |  | 18.3 (1.13)b  | <0.01 | <0.01 |
| 6 | Aspartic Acid               | 21 (1.49)a    | 20.1 (1.09)b  |  | 21 (1.17)a    | <0.01 | 0.026 |
| 6 | b-Alanine                   | 17.3 (1.39)a  | 17.7 (2.65)a  |  | 17.2 (2.56)a  | 0.864 | 0.902 |
| 6 | Betaine                     | 23.5 (1.66)a  | 21.5 (2.64)b  |  | 20.9 (2.78)b  | <0.01 | <0.01 |

On-line Supplementary Material

**Lauren Brink et al. Neonatal diet alters fecal microbiota and metabolome profiles over the first year of life in infants fed breast milk or formula.**

|   |                                            |               |               |  |               |       |       |
|---|--------------------------------------------|---------------|---------------|--|---------------|-------|-------|
| 6 | C18-Carnitine                              | 15.6 (2.05)a  | 13.4 (2.04)b  |  | 11.5 (3.31)b  | <0.01 | <0.01 |
| 6 | Caffeine                                   | 14.8 (2.07)a  | 10.3 (1.36)b  |  | 9.76 (1.03)b  | <0.01 | <0.01 |
| 6 | cis-11,12-Methylene Pentadecanoylcarnitine | 16.4 (2.92)a  | 15.2 (1.98)b  |  | 14.8 (1.62)b  | 0.06  | 0.127 |
| 6 | Citrulline                                 | 21.5 (2.1)a   | 22.4 (1.18)ab |  | 22.8 (1.05)b  | 0.08  | 0.154 |
| 6 | Creatine                                   | 22.7 (1.84)a  | 19.7 (3.49)b  |  | 20.2 (2.03)b  | <0.01 | <0.01 |
| 6 | Creatinine                                 | 19.2 (3.22)a  | 17.6 (1.74)ab |  | 16.9 (3.99)b  | 0.072 | 0.144 |
| 6 | Cyclohexanecarboxylic Acid                 | 13.1 (1.45)a  | 13.5 (1.03)a  |  | 13.4 (2.8)a   | 0.195 | 0.296 |
| 6 | Cystathionine                              | 14.2 (0.837)a | 13.5 (1.09)b  |  | 13.5 (1.12)b  | 0.066 | 0.134 |
| 6 | Cystine                                    | 16.6 (1.1)a   | 14.7 (1.22)b  |  | 14.6 (0.959)b | <0.01 | <0.01 |
| 6 | D-2-Aminobutyric Acid                      | 22 (2.19)a    | 21.2 (1.12)a  |  | 21 (0.653)a   | 0.351 | 0.462 |
| 6 | D-Sphingosine                              | 18.4 (1.2)a   | 16.9 (1.48)b  |  | 16.6 (1.27)b  | <0.01 | <0.01 |
| 6 | D6-trans-Cinnamic Acid                     | 16.3 (0.503)a | 16.1 (0.265)a |  | 15.7 (0.431)b | <0.01 | <0.01 |
| 6 | DL-3-aminoisobutyric acid                  | 21.2 (3.57)a  | 19.9 (2.4)a   |  | 19.9 (0.976)a | 0.236 | 0.344 |
| 6 | DL-Tryptophan                              | 23.9 (1.57)a  | 23 (1.67)a    |  | 23.9 (0.554)a | 0.131 | 0.222 |
| 6 | Dopamine                                   | 15.7 (0.92)a  | 17 (0.915)b   |  | 16.9 (0.516)b | <0.01 | <0.01 |
| 6 | Ectoine                                    | 14.3 (0.738)a | 14.6 (1.53)a  |  | 14.5 (1.53)a  | 0.681 | 0.755 |
| 6 | Equol                                      | 8.68 (0.845)a | 8.65 (0.41)a  |  | 8.77 (0.413)a | 0.952 | 0.966 |
| 6 | Ergothioneine                              | 14.8 (1.82)a  | 14 (0.756)b   |  | 13.3 (0.266)c | <0.01 | <0.01 |
| 6 | Ethanolamine                               | 17 (2.27)a    | 17 (1.67)a    |  | 15.2 (1.97)b  | <0.01 | <0.01 |
| 6 | Ferulic Acid                               | 15.7 (4.42)a  | 16.8 (2.64)a  |  | 16.6 (2.51)a  | 0.13  | 0.22  |
| 6 | Galactitol                                 | 18.9 (1.69)a  | 22.2 (1.73)b  |  | 16.8 (1.19)c  | <0.01 | <0.01 |
| 6 | Genistein                                  | 9.51 (1.27)a  | 8.97 (0.5)a   |  | 13.1 (2.22)b  | <0.01 | <0.01 |
| 6 | Glutamic Acid                              | 24.8 (0.869)a | 24.5 (0.679)a |  | 25.2 (0.757)b | <0.01 | 0.031 |

On-line Supplementary Material

**Lauren Brink et al. Neonatal diet alters fecal microbiota and metabolome profiles over the first year of life in infants fed breast milk or formula.**

|   |                              |               |               |  |               |       |       |
|---|------------------------------|---------------|---------------|--|---------------|-------|-------|
| 6 | Glutamine                    | 20.8 (1.81)a  | 20 (0.865)b   |  | 21.4 (1.23)a  | <0.01 | <0.01 |
| 6 | Glutaric Acid                | 14.7 (1.76)a  | 14.3 (1.69)a  |  | 14.7 (1.19)a  | 0.351 | 0.462 |
| 6 | Glycine                      | 21.7 (0.828)a | 20.3 (0.864)b |  | 20.1 (0.764)b | <0.01 | <0.01 |
| 6 | Glycitein                    | 9.07 (0.831)a | 8.81 (0.775)a |  | 9.78 (4.4)b   | <0.01 | 0.014 |
| 6 | Hexanoic Acid                | 9.76 (2.97)a  | 11.8 (3.92)ab |  | 11.7 (2.03)b  | 0.078 | 0.152 |
| 6 | Histidine                    | 19.7 (1.57)a  | 18.9 (1.53)b  |  | 18.8 (1.36)b  | 0.03  | 0.071 |
| 6 | Imidazolepropionic Acid      | 22 (2.12)a    | 22.1 (1.43)a  |  | 22.3 (0.789)a | 0.893 | 0.923 |
| 6 | Indole-3-Acetic Acid         | 14.8 (2.06)a  | 16.8 (1.76)b  |  | 17.7 (1.83)b  | 0.029 | 0.071 |
| 6 | Indole-3-Lactic Acid         | 22.6 (2.32)a  | 20.4 (3.13)b  |  | 17 (2.95)c    | <0.01 | <0.01 |
| 6 | Indole-3-Propionic Acid      | 12.9 (2.9)a   | 14.6 (4.36)a  |  | 14.7 (5.58)a  | 0.258 | 0.371 |
| 6 | Inosine                      | 16.4 (3.15)a  | 15.5 (3.21)a  |  | 17.8 (2.4)b   | <0.01 | 0.021 |
| 6 | Isobutyric Acid              | 14.3 (5.07)a  | 19.4 (1.24)b  |  | 19.8 (1.06)b  | <0.01 | <0.01 |
| 6 | Isovaleric Acid              | 12.1 (5.72)a  | 16.3 (0.801)b |  | 17.3 (0.891)c | <0.01 | <0.01 |
| 6 | Jasmonic acid                | 14.9 (1.64)a  | 15.9 (1.37)a  |  | 17.3 (2.29)b  | <0.01 | <0.01 |
| 6 | Kynurenic Acid               | 21.2 (1.21)a  | 19 (2.04)b    |  | 19.8 (1.41)b  | <0.01 | <0.01 |
| 6 | L-Carnitine                  | 21.7 (1.58)a  | 20.9 (1.28)b  |  | 20.1 (1.69)b  | <0.01 | <0.01 |
| 6 | L-DOPA                       | 14.2 (3.59)a  | 14.8 (1.15)a  |  | 14.9 (1.41)a  | 0.812 | 0.86  |
| 6 | L-Kynurenine                 | 15.9 (0.993)a | 15.6 (0.709)a |  | 16 (1.21)a    | 0.141 | 0.234 |
| 6 | L-Phenylalanine              | 25.8 (1.5)a   | 25.5 (1.36)a  |  | 25.5 (1.41)a  | 0.343 | 0.455 |
| 6 | L-Pipecolic Acid             | 23.5 (3.38)a  | 24.6 (2.16)b  |  | 22.9 (1)a     | <0.01 | 0.023 |
| 6 | L-Pyroglutamic Acid          | 22.4 (1.67)a  | 20.6 (2.27)b  |  | 20.6 (1.97)b  | 0.027 | 0.068 |
| 6 | L-Saccharophine              | 15.8 (1.14)a  | 14.8 (0.608)b |  | 14.9 (0.855)b | <0.01 | 0.022 |
| 6 | Lysine                       | 20.3 (0.983)a | 21.2 (1.64)b  |  | 21.4 (1.55)b  | 0.038 | 0.087 |
| 6 | m-Hydroxy-Hydrocinnamic Acid | 13.2 (4.46)a  | 14.4 (3.41)a  |  | 15.5 (2.17)b  | 0.022 | 0.059 |

On-line Supplementary Material

**Lauren Brink et al. Neonatal diet alters fecal microbiota and metabolome profiles over the first year of life in infants fed breast milk or formula.**

|   |                          |               |               |  |               |       |       |
|---|--------------------------|---------------|---------------|--|---------------|-------|-------|
| 6 | Methionine               | 23.8 (0.912)a | 23.9 (0.958)a |  | 23.7 (1.17)a  | 0.875 | 0.912 |
| 6 | Myo-Inositol             | 20.8 (0.887)a | 19.5 (1.79)b  |  | 18.9 (1.55)c  | <0.01 | <0.01 |
| 6 | N-Acetylneuraminic Acid  | 22.3 (2.96)a  | 18 (2.01)b    |  | 19.1 (1.43)b  | <0.01 | <0.01 |
| 6 | N-Cinnamylglycine        | 13 (1.19)a    | 12.5 (1.1)a   |  | 10.9 (1.24)b  | <0.01 | <0.01 |
| 6 | N-Methylhistidine        | 15.7 (1.86)a  | 17.8 (3.86)a  |  | 15.6 (3.17)a  | 0.234 | 0.343 |
| 6 | N?-Acetylhistamine       | 17.9 (2.18)a  | 18 (1.13)a    |  | 19 (0.978)b   | 0.024 | 0.063 |
| 6 | N?,N?,N?-Trimethyllysine | 16.5 (3.01)a  | 17.1 (2.59)a  |  | 18 (2.35)b    | 0.066 | 0.134 |
| 6 | N1,N12-Diacetylspermine  | 14.9 (2.17)a  | 13.6 (1.91)b  |  | 13 (1.94)b    | <0.01 | 0.026 |
| 6 | Neopterin                | 16.7 (1.43)a  | 15 (1.32)b    |  | 14.3 (0.746)b | <0.01 | <0.01 |
| 6 | Nicotinamide             | 15.6 (4.06)a  | 14.4 (2.41)a  |  | 15.4 (1.39)a  | 0.206 | 0.309 |
| 6 | Nicotinic Acid           | 22.9 (2)a     | 24.2 (1.16)b  |  | 24.4 (0.458)b | <0.01 | 0.019 |
| 6 | Oleic acid               | 14.5 (1.66)a  | 12.9 (2.17)a  |  | 12.3 (4.54)a  | 0.137 | 0.23  |
| 6 | Ornithine                | 18.1 (3.06)a  | 17.1 (1.59)ab |  | 16.1 (2.4)b   | 0.064 | 0.131 |
| 6 | p-Aminobenzoic Acid      | 14.7 (1.2)a   | 13.6 (1.98)a  |  | 13.8 (1.33)a  | 0.176 | 0.278 |
| 6 | Palmitoylcarnitine       | 17.3 (1.74)a  | 16 (2.57)b    |  | 14.6 (2.57)b  | <0.01 | 0.02  |
| 6 | Phenylacetic Acid        | 13.2 (2.4)a   | 14 (1.54)a    |  | 15.4 (1.15)b  | <0.01 | <0.01 |
| 6 | Phenylacetyl glycine     | 12.6 (4.05)ab | 15.1 (4.58)a  |  | 11.6 (1.61)b  | <0.01 | 0.016 |
| 6 | Phloretic Acid           | 12.3 (0.911)a | 11.9 (1.76)a  |  | 12.8 (0.698)a | 0.137 | 0.23  |
| 6 | Piperine                 | 7.99 (1.43)a  | 8.04 (0.724)a |  | 8.41 (1.02)a  | 0.62  | 0.715 |
| 6 | Proline                  | 25.6 (2.01)a  | 24.6 (0.59)b  |  | 24 (1.52)c    | <0.01 | <0.01 |
| 6 | Propionic Acid           | 20.4 (3.1)a   | 22.8 (1.16)b  |  | 22.3 (1.53)b  | <0.01 | <0.01 |
| 6 | Protocatechuic Acid      | 13.9 (2.34)a  | 12.8 (1.26)b  |  | 14.3 (2.3)a   | <0.01 | 0.031 |
| 6 | Putrescine               | 20.9 (2.36)a  | 20.2 (2.58)a  |  | 20.2 (1.48)a  | 0.486 | 0.599 |
| 6 | Ralgin                   | 11.2 (0.457)a | 11.2 (1.27)a  |  | 11.7 (1.76)a  | 0.68  | 0.755 |



On-line Supplementary Material

**Lauren Brink et al. Neonatal diet alters fecal microbiota and metabolome profiles over the first year of life in infants fed breast milk or formula.**

|   |                                 |               |               |  |               |       |       |
|---|---------------------------------|---------------|---------------|--|---------------|-------|-------|
| 6 | Riboflavin                      | 18.1 (1.11)a  | 18.2 (1.24)ab |  | 17.5 (0.938)b | 0.075 | 0.148 |
| 6 | sarcosine                       | 24.7 (1.18)a  | 23.8 (0.671)b |  | 23.4 (0.685)c | <0.01 | <0.01 |
| 6 | Sebacic Acid                    | 14.9 (1.22)a  | 15.1 (0.928)a |  | 16.1 (0.799)b | <0.01 | <0.01 |
| 6 | Serine                          | 20.7 (0.775)a | 20.5 (0.727)a |  | 20.4 (0.583)a | 0.15  | 0.248 |
| 6 | Sinapinic Acid                  | 13.2 (2.85)a  | 13.5 (2.4)a   |  | 13.4 (1.77)a  | 0.588 | 0.69  |
| 6 | Skatole                         | 9.62 (1.02)a  | 8.81 (0.662)a |  | 9.13 (0.831)a | 0.198 | 0.3   |
| 6 | Spermidine                      | 18.1 (3.09)a  | 21 (2.3)b     |  | 19.8 (2.41)ab | 0.05  | 0.108 |
| 6 | Spermine                        | 12.4 (1.43)a  | 12.1 (0.938)a |  | 12 (1.48)a    | 0.341 | 0.454 |
| 6 | Stachydrine                     | 15 (1.11)a    | 17.7 (1.73)b  |  | 17.4 (4.8)b   | <0.01 | <0.01 |
| 6 | Syringic Acid                   | 12.5 (3.74)a  | 13.8 (2.68)a  |  | 16.9 (2.21)b  | <0.01 | <0.01 |
| 6 | Taurine                         | 21.7 (1.02)a  | 22.2 (1.45)a  |  | 21.9 (0.736)a | 0.372 | 0.485 |
| 6 | trans-4-Hydroxyproline          | 19 (0.709)a   | 18.3 (0.692)b |  | 18.8 (1.14)a  | 0.02  | 0.054 |
| 6 | trans-Cinnamic Acid             | 12 (1.84)a    | 12.1 (1.39)a  |  | 12.2 (0.818)a | 0.983 | 0.991 |
| 6 | Trigonelline                    | 22.7 (1.37)a  | 19.9 (2.16)b  |  | 19.4 (1.48)b  | <0.01 | <0.01 |
| 6 | Trimethylamine-N-oxide          | 16.1 (3.04)ab | 16.7 (1.69)a  |  | 15 (1.31)b    | 0.021 | 0.057 |
| 6 | Tyrosine                        | 24 (1.43)a    | 24 (1.04)a    |  | 24.6 (0.774)b | 0.01  | 0.031 |
| 6 | Uracil                          | 21.9 (2.16)a  | 21.9 (0.868)a |  | 21.3 (0.792)a | 0.094 | 0.173 |
| 6 | Uric Acid                       | 20.5 (6.74)a  | 14.5 (2.56)b  |  | 14.8 (2.51)b  | <0.01 | <0.01 |
| 6 | Urobilin                        | 19 (8.24)a    | 22.7 (2.22)a  |  | 24 (1.02)b    | 0.017 | 0.047 |
| 6 | Urobilinogen                    | 16.8 (6.04)a  | 18.5 (3.85)a  |  | 22.5 (1.35)b  | <0.01 | <0.01 |
| 6 | Valeric Acid                    | 10.5 (2.14)a  | 15.3 (2.21)b  |  | 13.2 (2.4)b   | <0.01 | <0.01 |
| 6 | Valine                          | 25.3 (1.73)a  | 24.4 (0.78)b  |  | 24.5 (0.972)b | <0.01 | 0.022 |
| 6 | $\gamma$ -Glutamylphenylalanine | 16.6 (2.55)a  | 14.8 (1.17)b  |  | 15.7 (1.63)ab | 0.043 | 0.096 |
| 9 | (-)-Epicatechin                 | 10.5 (2.69)a  | 10.9 (2.18)a  |  | 9.04 (1.18)b  | 0.031 | 0.074 |

On-line Supplementary Material

**Lauren Brink et al. Neonatal diet alters fecal microbiota and metabolome profiles over the first year of life in infants fed breast milk or formula.**

|   |                             |               |               |  |               |       |       |
|---|-----------------------------|---------------|---------------|--|---------------|-------|-------|
| 9 | 1-Methylhydantoin           | 18.2 (2.11)a  | 18 (2.96)a    |  | 14.3 (1.99)b  | <0.01 | <0.01 |
| 9 | 1-Methyluric Acid           | 17.2 (3.82)a  | 14.9 (2.92)b  |  | 16.7 (1.39)ab | 0.018 | 0.05  |
| 9 | 2-Aminophenol               | 15.2 (2.6)a   | 17.1 (1.05)b  |  | 16.5 (1.22)b  | <0.01 | 0.02  |
| 9 | 2-Phenylacetamide           | 12.4 (0.635)a | 12.5 (1.52)a  |  | 12.9 (1.11)a  | 0.437 | 0.548 |
| 9 | 3-Methylxanthine            | 15.1 (2.97)a  | 11.2 (1.06)b  |  | 11.3 (0.863)b | <0.01 | <0.01 |
| 9 | 4-Hydroxyphenylpyruvic Acid | 12.1 (1.33)a  | 11.4 (0.629)a |  | 13.6 (2.24)b  | <0.01 | <0.01 |
| 9 | 4-Imidazoleacetic Acid      | 16.3 (2.47)a  | 15.7 (1.03)a  |  | 16.1 (1.18)a  | 0.821 | 0.865 |
| 9 | 4-Imidazoleacrylic Acid     | 21 (1.53)ab   | 20.5 (2.67)a  |  | 22 (1.5)b     | 0.058 | 0.125 |
| 9 | 4-Imidazolecarboxylic Acid  | 15.4 (1.93)a  | 14.6 (0.975)a |  | 14.8 (1.12)a  | 0.334 | 0.446 |
| 9 | 4-Oxoproline                | 23.4 (0.693)a | 22.4 (0.728)b |  | 22.9 (0.437)a | <0.01 | 0.017 |
| 9 | 4-Pyridoxic acid            | 19.1 (1.26)ab | 19.9 (1.29)a  |  | 18.7 (1.46)b  | 0.049 | 0.106 |
| 9 | 5-Aminovaleric Acid         | 24.5 (2.05)a  | 22.8 (1.75)a  |  | 24.3 (2.27)a  | 0.122 | 0.21  |
| 9 | 5-Hydroxylysine             | 15.2 (0.919)a | 15.1 (2.32)a  |  | 14.7 (1.85)a  | 0.498 | 0.608 |
| 9 | 5-Hydroxytryptamine         | 13.1 (2.29)a  | 12.7 (2.14)a  |  | 14.8 (2.99)a  | 0.109 | 0.191 |
| 9 | 6-Hydroxydopamine           | 18 (2.06)a    | 17.8 (1.41)a  |  | 17.5 (1.56)a  | 0.418 | 0.533 |
| 9 | Acetic Acid                 | 22.5 (1.89)a  | 22.7 (1.01)a  |  | 22.9 (0.415)a | 0.114 | 0.196 |
| 9 | Acetylmuramic Acid          | 19.7 (2.14)a  | 19.3 (1.32)a  |  | 19.6 (1.74)a  | 0.496 | 0.608 |
| 9 | Arginine                    | 17.5 (2.72)a  | 18.1 (1.05)a  |  | 19.2 (1.41)b  | <0.01 | 0.022 |
| 9 | Asparagine                  | 16.6 (1.84)a  | 16.4 (1.47)a  |  | 18.2 (0.762)b | 0.012 | 0.036 |
| 9 | Aspartic Acid               | 21.3 (1.31)a  | 20.1 (0.682)b |  | 20.7 (1.52)a  | 0.034 | 0.08  |
| 9 | b-Alanine                   | 17.1 (1.84)a  | 19 (3.45)a    |  | 18.3 (2.78)a  | 0.436 | 0.548 |
| 9 | Betaine                     | 23.3 (3.27)a  | 20.9 (2.14)b  |  | 18.7 (1.52)c  | <0.01 | <0.01 |
| 9 | C18-Carnitine               | 15.4 (1.56)a  | 12.4 (2.23)b  |  | 11.1 (2.97)b  | <0.01 | <0.01 |
| 9 | Caffeine                    | 13 (3.53)a    | 9.48 (1.31)b  |  | 10.4 (1.45)b  | <0.01 | <0.01 |

On-line Supplementary Material

**Lauren Brink et al. Neonatal diet alters fecal microbiota and metabolome profiles over the first year of life in infants fed breast milk or formula.**

|   |                                            |               |               |  |                |       |       |
|---|--------------------------------------------|---------------|---------------|--|----------------|-------|-------|
| 9 | cis-11,12-Methylene Pentadecanoylcarnitine | 15.1 (2.34)a  | 14.8 (1.9)ab  |  | 13.6 (1.86)b   | <0.01 | 0.026 |
| 9 | Citrulline                                 | 22.3 (2.79)a  | 22.4 (2.9)a   |  | 22.4 (0.95)a   | 0.66  | 0.745 |
| 9 | Creatine                                   | 21.1 (3.19)a  | 20 (3.3)b     |  | 19.5 (2.12)b   | 0.045 | 0.1   |
| 9 | Creatinine                                 | 17.8 (4.67)a  | 17.6 (0.846)a |  | 15.9 (4.31)a   | 0.468 | 0.581 |
| 9 | Cyclohexanecarboxylic Acid                 | 13.5 (1.43)a  | 14.5 (2.13)ab |  | 15.2 (2.54)b   | 0.083 | 0.159 |
| 9 | Cystathionine                              | 14 (1.33)a    | 13.6 (0.592)a |  | 13.4 (0.925)a  | 0.278 | 0.389 |
| 9 | Cystine                                    | 16 (1.46)a    | 15.6 (1.84)ab |  | 14.4 (1.03)b   | <0.01 | 0.023 |
| 9 | D-2-Aminobutyric Acid                      | 21.2 (1.82)a  | 20.2 (1.2)a   |  | 20.6 (1.57)a   | 0.424 | 0.537 |
| 9 | D-Sphingosine                              | 17.9 (1.14)a  | 16.7 (1.06)b  |  | 15.8 (1.22)b   | <0.01 | <0.01 |
| 9 | D6-trans-Cinnamic Acid                     | 16.3 (0.343)a | 15.9 (0.579)b |  | 15.8 (0.342)b  | <0.01 | <0.01 |
| 9 | DL-3-aminoisobutyric acid                  | 20.5 (2.06)a  | 19.4 (1.62)a  |  | 20.6 (1.26)a   | 0.159 | 0.26  |
| 9 | DL-Tryptophan                              | 23.2 (1.33)a  | 22.6 (1.01)b  |  | 23.1 (0.903)a  | 0.013 | 0.038 |
| 9 | Dopamine                                   | 16.9 (1.75)a  | 18.3 (1.21)b  |  | 17.1 (0.66)a   | 0.017 | 0.047 |
| 9 | Ectoine                                    | 14.9 (1.68)a  | 15.1 (1.05)a  |  | 16.2 (1.58)a   | 0.086 | 0.163 |
| 9 | Equol                                      | 8.7 (0.427)a  | 8.33 (0.228)b |  | 8.7 (0.884)a   | <0.01 | 0.026 |
| 9 | Ergothioneine                              | 14.6 (2.19)a  | 13.9 (1.13)a  |  | 13.7 (1.3)a    | 0.599 | 0.699 |
| 9 | Ethanolamine                               | 16.1 (1.04)a  | 15.5 (2.58)ab |  | 14.9 (1.65)b   | 0.028 | 0.07  |
| 9 | Ferulic Acid                               | 18.4 (1.7)a   | 18.4 (1.33)a  |  | 15.8 (2.89)b   | <0.01 | 0.02  |
| 9 | Galactitol                                 | 18.9 (1.67)a  | 21.8 (0.926)b |  | 16.7 (0.522)c  | <0.01 | <0.01 |
| 9 | Genistein                                  | 8.95 (0.739)a | 8.61 (0.59)a  |  | 12.6 (2.29)b   | <0.01 | <0.01 |
| 9 | Glutamic Acid                              | 25 (0.852)a   | 24.2 (0.79)b  |  | 24.1 (0.944)ab | 0.037 | 0.086 |
| 9 | Glutamine                                  | 20.7 (0.863)a | 19.9 (0.841)b |  | 20.7 (0.317)a  | <0.01 | 0.016 |
| 9 | Glutaric Acid                              | 14.7 (1.27)a  | 14.6 (2.15)a  |  | 15.4 (0.921)a  | 0.17  | 0.269 |

On-line Supplementary Material

**Lauren Brink et al. Neonatal diet alters fecal microbiota and metabolome profiles over the first year of life in infants fed breast milk or formula.**

|   |                              |               |               |  |               |       |       |
|---|------------------------------|---------------|---------------|--|---------------|-------|-------|
| 9 | Glycine                      | 21.1 (1.68)a  | 19.8 (0.996)b |  | 19.9 (0.854)b | <0.01 | 0.023 |
| 9 | Glycitein                    | 9.17 (0.779)a | 8.74 (0.494)b |  | 9.17 (3.16)a  | <0.01 | <0.01 |
| 9 | Hexanoic Acid                | 11.5 (2.56)a  | 10.8 (1.53)a  |  | 11.8 (2.04)a  | 0.408 | 0.524 |
| 9 | Histidine                    | 19.4 (2.29)a  | 18.9 (1.33)ab |  | 18 (2.3)b     | 0.061 | 0.128 |
| 9 | Imidazolepropionic Acid      | 22.6 (2.73)a  | 22.5 (1.42)a  |  | 21.8 (1.37)a  | 0.433 | 0.546 |
| 9 | Indole-3-Acetic Acid         | 17.2 (2.86)a  | 17.8 (2.72)a  |  | 18.2 (1.61)a  | 0.207 | 0.309 |
| 9 | Indole-3-Lactic Acid         | 22.1 (2.67)a  | 20.1 (3.91)b  |  | 18.3 (3.01)c  | <0.01 | <0.01 |
| 9 | Indole-3-Propionic Acid      | 12.8 (4.6)a   | 18.4 (4.62)a  |  | 16.4 (5.19)a  | 0.164 | 0.266 |
| 9 | Inosine                      | 15 (3.31)a    | 15.3 (3.04)a  |  | 17.6 (2.2)b   | 0.021 | 0.057 |
| 9 | Isobutyric Acid              | 19.4 (3.09)a  | 19.1 (0.809)a |  | 20.4 (0.756)b | <0.01 | 0.011 |
| 9 | Isovaleric Acid              | 15.5 (3.83)a  | 16 (3.05)a    |  | 17.1 (1.73)b  | 0.029 | 0.071 |
| 9 | Jasmonic acid                | 15.7 (1.16)a  | 15.4 (1.27)a  |  | 16.8 (1.47)b  | <0.01 | <0.01 |
| 9 | Kynurenic Acid               | 21.1 (0.958)a | 19.6 (1.61)b  |  | 18.6 (2.35)b  | <0.01 | <0.01 |
| 9 | L-Carnitine                  | 20.6 (1)a     | 20 (2.18)ab   |  | 19.9 (1.22)b  | 0.064 | 0.131 |
| 9 | L-DOPA                       | 14.9 (2.85)a  | 15.2 (1.38)a  |  | 15.1 (1.71)a  | 0.658 | 0.744 |
| 9 | L-Kynurenine                 | 14.7 (1.39)a  | 14.8 (1.5)a   |  | 15.9 (0.756)b | 0.013 | 0.038 |
| 9 | L-Phenylalanine              | 25.8 (1.29)a  | 24.9 (1.35)a  |  | 25.9 (0.37)a  | 0.109 | 0.191 |
| 9 | L-Pipecolic Acid             | 24.5 (3.68)a  | 24.4 (2.28)a  |  | 23.6 (1.14)a  | 0.684 | 0.757 |
| 9 | L-Pyroglutamic Acid          | 21.8 (3.35)a  | 20.1 (1.64)b  |  | 19.1 (1.31)b  | 0.019 | 0.053 |
| 9 | L-Saccharophine              | 15.7 (0.779)a | 15.4 (0.38)ab |  | 15 (0.589)b   | <0.01 | 0.011 |
| 9 | Lysine                       | 20.4 (2.33)a  | 21.8 (1.5)b   |  | 21.3 (0.86)b  | <0.01 | 0.02  |
| 9 | m-Hydroxy-Hydrocinnamic Acid | 15.5 (1.85)a  | 13.8 (2.52)a  |  | 15.3 (1.44)a  | 0.166 | 0.267 |
| 9 | Methionine                   | 23.8 (1.43)ab | 22.7 (1.33)a  |  | 24.3 (0.469)b | 0.029 | 0.071 |
| 9 | Myo-Inositol                 | 20.8 (1.15)a  | 19.3 (2.54)a  |  | 19.8 (1.09)a  | 0.075 | 0.148 |

On-line Supplementary Material

**Lauren Brink et al. Neonatal diet alters fecal microbiota and metabolome profiles over the first year of life in infants fed breast milk or formula.**

|   |                          |               |               |  |               |       |       |
|---|--------------------------|---------------|---------------|--|---------------|-------|-------|
| 9 | N-Acetylneuraminic Acid  | 20.6 (3.72)a  | 17.4 (1.72)b  |  | 17.7 (1.34)b  | <0.01 | <0.01 |
| 9 | N-Cinnamylglycine        | 13.1 (1.2)a   | 11.8 (0.808)b |  | 11.3 (1.03)b  | <0.01 | <0.01 |
| 9 | N-Methylhistidine        | 14.4 (2.37)a  | 15.9 (2.98)a  |  | 14.6 (3.45)a  | 0.184 | 0.286 |
| 9 | N?-Acetylhistamine       | 18.9 (1.88)a  | 18.8 (2.31)a  |  | 18.8 (1.05)a  | 0.552 | 0.658 |
| 9 | N?,N?,N?-Trimethyllysine | 16.4 (4.33)a  | 17.2 (3.05)a  |  | 17.9 (3.93)a  | 0.686 | 0.758 |
| 9 | N1,N12-Diacetylspermine  | 13.2 (1.66)a  | 13.1 (1.49)a  |  | 12.8 (2.39)a  | 0.903 | 0.931 |
| 9 | Neopterin                | 15.7 (1.03)a  | 14.4 (1.88)b  |  | 13.9 (0.755)b | <0.01 | <0.01 |
| 9 | Nicotinamide             | 15 (2.4)a     | 16.1 (1.2)a   |  | 15.3 (1.39)a  | 0.317 | 0.427 |
| 9 | Nicotinic Acid           | 23.9 (1.35)a  | 23.2 (2.21)a  |  | 24.1 (2.7)a   | 0.743 | 0.811 |
| 9 | Oleic acid               | 14 (1.72)a    | 13.2 (2.34)ab |  | 11.6 (1.87)b  | 0.05  | 0.108 |
| 9 | Ornithine                | 15.5 (4.82)a  | 17 (2.3)a     |  | 14.3 (2.19)a  | 0.299 | 0.409 |
| 9 | p-Aminobenzoic Acid      | 15.1 (2.15)a  | 14.3 (3.02)a  |  | 14.7 (2.63)a  | 0.878 | 0.912 |
| 9 | Palmitoylcarnitine       | 16.4 (1.48)a  | 15.7 (1.48)b  |  | 14.1 (0.975)c | <0.01 | <0.01 |
| 9 | Phenylacetic Acid        | 14.5 (1.59)a  | 14.2 (1.73)a  |  | 15.7 (1.15)b  | <0.01 | 0.031 |
| 9 | Phenylacetyl glycine     | 13 (2.72)a    | 13.5 (4.44)a  |  | 11.9 (1.5)a   | 0.105 | 0.188 |
| 9 | Phloretic Acid           | 13.3 (0.622)a | 12.4 (1.26)b  |  | 12.5 (0.968)b | 0.011 | 0.034 |
| 9 | Piperine                 | 8.76 (2.28)a  | 8.38 (1.22)a  |  | 8.45 (0.411)a | 0.8   | 0.853 |
| 9 | Proline                  | 24.5 (2.56)a  | 24 (2.31)a    |  | 24.2 (0.982)a | 0.298 | 0.409 |
| 9 | Propionic Acid           | 22.5 (1.85)a  | 22.6 (0.504)a |  | 22.6 (1.4)a   | 0.812 | 0.86  |
| 9 | Protocatechuic Acid      | 17.1 (1.77)a  | 15.1 (1.87)b  |  | 14.4 (1.79)b  | <0.01 | <0.01 |
| 9 | Putrescine               | 20 (1.94)a    | 20 (2.55)a    |  | 18.8 (2.1)a   | 0.268 | 0.381 |
| 9 | Ralgin                   | 12 (1.52)a    | 11.3 (0.885)a |  | 11.1 (1.78)a  | 0.086 | 0.163 |
| 9 | Riboflavin               | 18.3 (1.97)a  | 17.4 (1.86)a  |  | 17.8 (1.28)a  | 0.613 | 0.712 |
| 9 | sarcosine                | 24 (0.866)a   | 23.1 (0.504)b |  | 23.2 (0.793)b | 0.035 | 0.081 |

On-line Supplementary Material

**Lauren Brink et al. Neonatal diet alters fecal microbiota and metabolome profiles over the first year of life in infants fed breast milk or formula.**

|    |                         |               |               |               |               |       |       |
|----|-------------------------|---------------|---------------|---------------|---------------|-------|-------|
| 9  | Sebacic Acid            | 14.7 (0.823)a | 14.6 (0.601)a |               | 16.2 (1.22)b  | <0.01 | <0.01 |
| 9  | Serine                  | 20.8 (1.04)a  | 20 (1.12)a    |               | 20.2 (1.29)a  | 0.121 | 0.209 |
| 9  | Sinapinic Acid          | 14.5 (1.34)a  | 14.1 (2.59)ab |               | 13.8 (1.73)b  | 0.096 | 0.174 |
| 9  | Skatole                 | 9.25 (0.974)a | 8.77 (0.598)b |               | 9.6 (1.03)a   | 0.015 | 0.042 |
| 9  | Spermidine              | 18.2 (3.47)a  | 21.4 (2.58)b  |               | 21.7 (3.05)b  | <0.01 | 0.017 |
| 9  | Spermine                | 11.4 (1.04)a  | 12 (1.31)a    |               | 11.9 (2.51)a  | 0.106 | 0.189 |
| 9  | Stachydrine             | 18 (2.41)a    | 17.1 (2.75)a  |               | 17.9 (1.96)a  | 0.907 | 0.933 |
| 9  | Syringic Acid           | 15.8 (1.62)a  | 14.9 (3.4)b   |               | 16.4 (2.8)a   | 0.023 | 0.06  |
| 9  | Taurine                 | 21.6 (1.23)a  | 21.4 (1.8)a   |               | 21.6 (0.332)a | 0.707 | 0.775 |
| 9  | trans-4-Hydroxyproline  | 20 (1.46)a    | 20.7 (1.61)a  |               | 18.7 (0.691)b | <0.01 | <0.01 |
| 9  | trans-Cinnamic Acid     | 12.5 (1.58)a  | 12.2 (1.21)a  |               | 12.6 (1.04)a  | 0.525 | 0.634 |
| 9  | Trigonelline            | 21.3 (1.58)a  | 17.2 (3.06)b  |               | 18.2 (2.55)b  | <0.01 | <0.01 |
| 9  | Trimethylamine-N-oxide  | 15.3 (1.93)a  | 16.3 (3.81)a  |               | 14.2 (0.893)b | 0.059 | 0.125 |
| 9  | Tyrosine                | 24.3 (1.33)ab | 23.4 (1.37)a  |               | 24.4 (0.753)b | 0.066 | 0.134 |
| 9  | Uracil                  | 22 (1.28)a    | 21.4 (0.928)a |               | 21.2 (1.54)a  | 0.239 | 0.347 |
| 9  | Uric Acid               | 15.7 (1.64)a  | 15.2 (2.95)a  |               | 14.4 (2.37)a  | 0.09  | 0.168 |
| 9  | Urobilin                | 23.2 (4.6)a   | 23 (2.85)a    |               | 23.6 (0.582)a | 0.285 | 0.396 |
| 9  | Urobilinogen            | 15.4 (6.7)a   | 17.5 (5.14)a  |               | 21.1 (1.68)b  | 0.022 | 0.058 |
| 9  | Valeric Acid            | 13.3 (2.51)a  | 13.1 (1.81)ab |               | 14.6 (3.25)b  | 0.068 | 0.136 |
| 9  | Valine                  | 24.7 (1.48)a  | 23.9 (1.45)a  |               | 24.6 (0.717)a | 0.212 | 0.314 |
| 9  | γ-Glutamylphenylalanine | 15.3 (1.06)a  | 14.4 (1.06)b  |               | 15.3 (1.05)a  | 0.039 | 0.089 |
| 12 | (-)-Epicatechin         | 10.8 (1.97)a  | 9.45 (1.27)b  | 9.85 (2.02)ab | 9.74 (1.44)b  | 0.059 | 0.125 |
| 12 | 1-Methylhydantoin       | 17.7 (2.98)a  | 17.3 (2.11)a  | 16.8 (3.31)a  | 14 (2.37)b    | 0.014 | 0.041 |
| 12 | 1-Methyluric Acid       | 17.1 (1.77)a  | 17.9 (2.9)a   | 15.8 (0.518)a | 16.7 (1.58)a  | 0.128 | 0.218 |

On-line Supplementary Material

**Lauren Brink et al. Neonatal diet alters fecal microbiota and metabolome profiles over the first year of life in infants fed breast milk or formula.**

|    |                                            |              |               |               |               |       |       |
|----|--------------------------------------------|--------------|---------------|---------------|---------------|-------|-------|
| 12 | 2-Aminophenol                              | 16.5 (1.72)a | 16.3 (1.29)a  | 15.8 (1.39)a  | 15.8 (1.5)a   | 0.674 | 0.751 |
| 12 | 2-Phenylacetamide                          | 13 (1.03)a   | 13.2 (1.04)a  | 11.8 (2.65)a  | 13 (0.604)a   | 0.207 | 0.309 |
| 12 | 3-Methylxanthine                           | 13.9 (3.16)a | 14.2 (5.12)a  | 11.6 (2.06)a  | 11.8 (1.81)a  | 0.088 | 0.165 |
| 12 | 4-Hydroxyphenylpyruvic Acid                | 12 (1.04)a   | 11.7 (0.909)a | 12.5 (1.1)a   | 12.7 (1.87)a  | 0.123 | 0.211 |
| 12 | 4-Imidazoleacetic Acid                     | 15.2 (1.07)a | 15.3 (0.87)a  | 15.7 (1.74)a  | 16 (0.999)a   | 0.185 | 0.286 |
| 12 | 4-Imidazoleacrylic Acid                    | 20.5 (2.66)a | 22.3 (2.97)a  | 21.6 (2.93)a  | 22 (2.07)a    | 0.29  | 0.4   |
| 12 | 4-Imidazolecarboxylic Acid                 | 15.4 (1.86)a | 15.6 (1.22)a  | 15.6 (2.3)a   | 15.9 (1.98)a  | 0.577 | 0.682 |
| 12 | 4-Oxoproline                               | 22.9 (1.4)a  | 23 (1.05)a    | 22.9 (0.462)a | 23.2 (1.28)a  | 0.995 | 0.995 |
| 12 | 4-Pyridoxic acid                           | 20.3 (2.43)a | 20.8 (1.84)a  | 20.4 (1.39)a  | 19.8 (1.14)a  | 0.472 | 0.583 |
| 12 | 5-Aminovaleric Acid                        | 24.1 (2.02)a | 22.3 (4.07)a  | 24.6 (2.03)a  | 23.1 (1.07)a  | 0.085 | 0.162 |
| 12 | 5-Hydroxylysine                            | 14.6 (1.23)a | 14.9 (0.969)a | 15.1 (0.933)a | 15.3 (2.36)a  | 0.419 | 0.533 |
| 12 | 5-Hydroxytryptamine                        | 13.2 (3.71)a | 13 (2.02)a    | 13.6 (2.02)a  | 13.6 (1.43)a  | 0.623 | 0.717 |
| 12 | 6-Hydroxydopamine                          | 18.5 (1.23)a | 18.5 (2.09)a  | 18.2 (1.63)a  | 17.2 (1.38)b  | 0.028 | 0.07  |
| 12 | Acetic Acid                                | 23 (0.887)ab | 23 (0.902)ab  | 23.4 (0.686)a | 22.6 (1.71)b  | 0.044 | 0.098 |
| 12 | Acetylmuramic Acid                         | 19.3 (1.21)a | 19.5 (1.66)a  | 19.8 (1.53)a  | 19.6 (1.66)a  | 0.371 | 0.485 |
| 12 | Arginine                                   | 18.4 (1.95)a | 19.8 (1.55)a  | 19 (1.36)a    | 19.6 (1.06)a  | 0.375 | 0.488 |
| 12 | Asparagine                                 | 16.6 (1.85)a | 16.9 (2.7)ab  | 17.9 (1.68)ab | 18.3 (2.06)b  | 0.062 | 0.129 |
| 12 | Aspartic Acid                              | 20.7 (1.42)a | 19.8 (1.75)a  | 20.2 (1.87)a  | 20.9 (1.06)a  | 0.379 | 0.492 |
| 12 | β-Alanine                                  | 17.8 (1.88)a | 16.9 (1.77)a  | 17.5 (2.62)a  | 17.6 (3.12)a  | 0.419 | 0.533 |
| 12 | Betaine                                    | 20.8 (3.17)a | 22.2 (2.06)a  | 19.6 (3.43)a  | 21 (1.85)a    | 0.616 | 0.713 |
| 12 | C18-Carnitine                              | 14.9 (3.43)a | 13.7 (4.53)a  | 13.3 (4.94)a  | 13.2 (3.91)a  | 0.224 | 0.331 |
| 12 | Caffeine                                   | 13.4 (3.63)a | 11.6 (2.69)a  | 11.3 (1.82)a  | 10.9 (3.31)a  | 0.136 | 0.228 |
| 12 | cis-11,12-Methylene Pentadecanoylcarnitine | 15.3 (2.25)a | 14.7 (1.31)ab | 14 (2.93)ab   | 13.7 (0.609)b | 0.028 | 0.071 |
| 12 | Citrulline                                 | 22.5 (1.41)a | 22.5 (1.05)a  | 22.5 (1.08)a  | 22.9 (0.953)a | 0.269 | 0.381 |
| 12 | Creatine                                   | 20.5 (2.41)a | 19.4 (4.1)a   | 21.6 (2.06)a  | 21 (2.04)a    | 0.278 | 0.389 |

On-line Supplementary Material

**Lauren Brink et al. Neonatal diet alters fecal microbiota and metabolome profiles over the first year of life in infants fed breast milk or formula.**

|    |                            |               |                |                |               |       |       |
|----|----------------------------|---------------|----------------|----------------|---------------|-------|-------|
| 12 | Creatinine                 | 16.2 (1.58)a  | 15.7 (2.41)a   | 15 (2.76)a     | 14.9 (3.13)a  | 0.608 | 0.708 |
| 12 | Cyclohexanecarboxylic Acid | 14.7 (3.5)ab  | 13.7 (1.81)a   | 15.9 (1.92)b   | 15.3 (1.97)ab | 0.056 | 0.121 |
| 12 | Cystathionine              | 13.2 (0.623)a | 13.6 (0.807)a  | 13 (1.16)a     | 13.5 (1.19)a  | 0.274 | 0.386 |
| 12 | Cystine                    | 14.7 (1.28)a  | 14.8 (1.75)a   | 14.6 (0.934)a  | 14.1 (0.84)a  | 0.257 | 0.37  |
| 12 | D-2-Aminobutyric Acid      | 20.7 (1.5)ab  | 21.3 (0.886)a  | 20.7 (0.94)ab  | 20.4 (0.747)b | 0.109 | 0.191 |
| 12 | D-Sphingosine              | 19.6 (3.36)a  | 17.7 (1.8)ab   | 18.3 (2.55)ab  | 16.8 (0.987)b | 0.094 | 0.173 |
| 12 | D6-trans-Cinnamic Acid     | 16 (0.327)ab  | 16.2 (0.377)a  | 16.2 (0.38)a   | 15.8 (0.401)b | 0.029 | 0.071 |
| 12 | DL-3-aminoisobutyric acid  | 21.1 (1.67)a  | 18.8 (1.21)b   | 20.3 (0.63)a   | 20.1 (1.44)a  | <0.01 | <0.01 |
| 12 | DL-Tryptophan              | 23.1 (2.28)a  | 23.8 (1)a      | 23.5 (1.39)a   | 23.7 (1.98)a  | 0.579 | 0.683 |
| 12 | Dopamine                   | 16.3 (1.45)a  | 16.9 (1.21)a   | 17.1 (0.735)a  | 16.8 (0.312)a | 0.448 | 0.559 |
| 12 | Ectoine                    | 15.2 (1.82)a  | 15 (1.68)a     | 15.5 (1.32)a   | 14.9 (1.47)a  | 0.857 | 0.897 |
| 12 | Equol                      | 8.5 (0.868)a  | 8.45 (0.398)a  | 8.53 (0.402)a  | 8.49 (0.801)a | 0.794 | 0.852 |
| 12 | Ergothioneine              | 14.7 (2.12)a  | 13.7 (1.06)a   | 13.6 (1.07)a   | 14 (0.444)a   | 0.143 | 0.236 |
| 12 | Ethanolamine               | 15.5 (1.07)a  | 16.5 (1.16)a   | 15.7 (1.25)a   | 15.8 (1.63)a  | 0.18  | 0.281 |
| 12 | Ferulic Acid               | 18.1 (0.95)a  | 18.1 (2.11)a   | 18.3 (2.44)a   | 16.9 (1.76)a  | 0.31  | 0.421 |
| 12 | Galactitol                 | 18.1 (1.57)a  | 19 (3.81)a     | 17.8 (4.03)a   | 17 (1.31)a    | 0.215 | 0.319 |
| 12 | Genistein                  | 9.43 (3.22)ab | 8.84 (1.44)a   | 8.78 (2.1)ab   | 11.1 (1.85)b  | 0.06  | 0.127 |
| 12 | Glutamic Acid              | 24.2 (1.16)a  | 24.1 (1.06)a   | 24.3 (1.33)a   | 24.5 (0.805)a | 0.595 | 0.696 |
| 12 | Glutamine                  | 20.7 (1.2)a   | 21.1 (1.1)a    | 21.1 (1.36)a   | 20.8 (1.87)a  | 0.669 | 0.748 |
| 12 | Glutaric Acid              | 14.6 (1.09)a  | 14.5 (0.914)a  | 14.9 (0.703)a  | 15.1 (0.896)a | 0.112 | 0.195 |
| 12 | Glycine                    | 19.3 (0.933)a | 20.2 (1.18)b   | 20.5 (0.944)b  | 20 (0.502)ab  | 0.046 | 0.1   |
| 12 | Glycitein                  | 8.83 (1.02)a  | 8.97 (0.721)ab | 8.75 (0.821)ab | 9.37 (2.09)b  | 0.083 | 0.158 |
| 12 | Hexanoic Acid              | 10.6 (4.2)a   | 10.2 (1.89)a   | 11.4 (1.94)a   | 10.9 (1.07)a  | 0.347 | 0.46  |
| 12 | Histidine                  | 18.2 (2.15)a  | 18.8 (1.51)a   | 17.9 (1.31)a   | 18.1 (1.32)a  | 0.751 | 0.817 |
| 12 | Imidazolepropionic Acid    | 22.5 (0.824)a | 21.8 (1.85)a   | 22.5 (1.12)a   | 22.6 (1.42)a  | 0.184 | 0.286 |
| 12 | Indole-3-Acetic Acid       | 16.8 (2.21)a  | 15.9 (2.42)a   | 17.2 (1.47)a   | 17.1 (2.22)a  | 0.32  | 0.43  |



On-line Supplementary Material

**Lauren Brink et al. Neonatal diet alters fecal microbiota and metabolome profiles over the first year of life in infants fed breast milk or formula.**

|    |                                                                 |               |               |                |               |       |       |
|----|-----------------------------------------------------------------|---------------|---------------|----------------|---------------|-------|-------|
| 12 | Indole-3-Lactic Acid                                            | 19.7 (5.76)a  | 18.5 (3.6)a   | 18 (3.11)a     | 17.3 (3.36)a  | 0.467 | 0.581 |
| 12 | Indole-3-Propionic Acid                                         | 15.9 (6.14)a  | 18.6 (1.17)ab | 19.9 (1.61)b   | 17.8 (3.09)a  | 0.022 | 0.058 |
| 12 | Inosine                                                         | 15.4 (2.06)a  | 17.7 (2.82)ab | 16.7 (3.21)a   | 18.3 (1.8)b   | <0.01 | 0.022 |
| 12 | Isobutyric Acid                                                 | 20.8 (2.15)a  | 20.1 (0.873)a | 20.9 (1.5)a    | 20 (1.16)a    | 0.284 | 0.396 |
| 12 | Isovaleric Acid                                                 | 16.2 (2.2)a   | 16.9 (1.53)a  | 16.9 (1.82)a   | 17.3 (2.4)a   | 0.811 | 0.86  |
| 12 | Jasmonic acid                                                   | 16.8 (2.26)a  | 15.4 (1.37)a  | 16.1 (1.75)a   | 16.9 (2.62)a  | 0.186 | 0.286 |
| 12 | Kynurenic Acid                                                  | 20.5 (0.56)a  | 18.8 (2.05)b  | 20.2 (2.41)b   | 19.5 (2.02)b  | <0.01 | <0.01 |
| 12 | L-Carnitine                                                     | 19.8 (1.11)a  | 19.7 (2.08)a  | 19.8 (1.34)a   | 19.6 (0.937)a | 0.946 | 0.962 |
| 12 | L-DOPA                                                          | 14.4 (2.53)a  | 14.1 (0.944)a | 14.9 (0.982)a  | 14.5 (1.61)a  | 0.236 | 0.344 |
| 12 | L-Kynurenine                                                    | 15 (0.97)a    | 15.2 (0.978)a | 15 (0.62)a     | 15.8 (1.21)a  | 0.107 | 0.19  |
| 12 | L-Phenylalanine                                                 | 25.4 (0.862)a | 26.4 (1.38)a  | 25.9 (1.58)a   | 26.2 (1.48)a  | 0.165 | 0.267 |
| 12 | L-Pipecolic Acid                                                | 23.8 (1.3)a   | 23.8 (2.3)a   | 23.4 (1.26)a   | 23.5 (1.13)a  | 0.975 | 0.986 |
| 12 | L-Pyroglutamic Acid                                             | 19.2 (1.05)a  | 20 (1.58)a    | 19.6 (0.781)a  | 19.9 (1.86)a  | 0.203 | 0.307 |
| 12 | L-Saccharophine                                                 | 15.1 (2.19)a  | 15.1 (1.98)a  | 15.2 (1.53)a   | 15.3 (1.4)a   | 0.636 | 0.724 |
| 12 | Lysine                                                          | 19.9 (2.03)a  | 21.4 (1.14)b  | 20.8 (0.795)ab | 21.3 (0.914)b | 0.019 | 0.053 |
| 12 | m-Hydroxy-Hydrocinnamic Acid                                    | 14.8 (2.65)a  | 14.3 (2.29)a  | 14.9 (2.82)a   | 14.9 (1.33)a  | 0.762 | 0.825 |
| 12 | Methionine                                                      | 23.9 (0.807)a | 24.4 (1.12)a  | 24.1 (1.79)a   | 24.1 (1.32)a  | 0.421 | 0.534 |
| 12 | Myo-Inositol                                                    | 20.1 (1.6)a   | 20.6 (1.11)a  | 21.2 (2.05)a   | 19.8 (1.41)a  | 0.256 | 0.37  |
| 12 | N-Acetylneuraminic Acid                                         | 18.8 (1.04)a  | 18.5 (2.88)a  | 17.9 (2.19)a   | 17.7 (1.54)a  | 0.271 | 0.384 |
| 12 | N-Cinnamylglycine                                               | 12.4 (1.96)ab | 12.7 (1.9)a   | 11.4 (1.48)ab  | 11.3 (0.668)b | 0.015 | 0.041 |
| 12 | N-Methylhistidine                                               | 15 (2.2)a     | 14 (2.16)a    | 14.4 (3.6)a    | 15.2 (2.61)a  | 0.499 | 0.608 |
| 12 | N <sup>ε</sup> -Acetylhistamine                                 | 19.2 (1.52)a  | 18.6 (2.52)a  | 18.6 (1.65)a   | 18.7 (1.12)a  | 0.669 | 0.748 |
| 12 | N <sup>ε</sup> ,N <sup>ε</sup> ,N <sup>ε</sup> -Trimethyllysine | 17.9 (2.54)a  | 16.1 (3.64)a  | 17.6 (2.61)a   | 16.6 (3.2)a   | 0.389 | 0.503 |
| 12 | N1,N12-Diacetylspermine                                         | 12.7 (1.71)a  | 12.3 (1.52)a  | 13.2 (1.63)a   | 13 (2.27)a    | 0.189 | 0.289 |
| 12 | Neopterin                                                       | 14.6 (2.22)a  | 14.3 (1.34)a  | 14.1 (0.895)a  | 15 (1.13)a    | 0.631 | 0.722 |
| 12 | Nicotinamide                                                    | 14.9 (3.49)a  | 16.5 (3.74)a  | 15.5 (1.02)a   | 16.1 (2.6)a   | 0.768 | 0.826 |

On-line Supplementary Material

**Lauren Brink et al. Neonatal diet alters fecal microbiota and metabolome profiles over the first year of life in infants fed breast milk or formula.**

|    |                        |               |               |               |               |       |       |
|----|------------------------|---------------|---------------|---------------|---------------|-------|-------|
| 12 | Nicotinic Acid         | 24.2 (2.51)a  | 23.7 (1.24)a  | 24.1 (1.05)a  | 24.5 (0.789)a | 0.539 | 0.647 |
| 12 | Oleic acid             | 14.9 (2.11)a  | 14.5 (3.8)a   | 15.3 (2.49)a  | 12.8 (3.05)a  | 0.286 | 0.396 |
| 12 | Ornithine              | 15.1 (1.65)a  | 15.3 (1.83)a  | 15 (1.98)a    | 15.9 (1.18)a  | 0.444 | 0.555 |
| 12 | p-Aminobenzoic Acid    | 14.4 (2.03)a  | 15.1 (1.14)a  | 14.5 (1.29)a  | 15.2 (1.48)a  | 0.414 | 0.531 |
| 12 | Palmitoylcarnitine     | 16.5 (2.78)a  | 16 (3.12)a    | 14.9 (3.13)a  | 15.3 (2.36)a  | 0.167 | 0.267 |
| 12 | Phenylacetic Acid      | 15.2 (1.61)a  | 14.6 (1.54)a  | 14.7 (1.47)a  | 15.2 (1.27)a  | 0.493 | 0.605 |
| 12 | Phenylacetyl glycine   | 12.6 (2.41)ab | 12.9 (3.12)ab | 14.7 (2.8)a   | 11.9 (2.92)b  | 0.062 | 0.13  |
| 12 | Phloretic Acid         | 13.9 (1.64)a  | 12.4 (0.8)b   | 13.1 (1.37)ab | 13 (1.39)ab   | 0.043 | 0.096 |
| 12 | Piperine               | 9.51 (1.3)a   | 8.87 (1.75)a  | 9.47 (6.25)a  | 9.12 (1.81)a  | 0.924 | 0.946 |
| 12 | Proline                | 23.7 (1.46)ab | 24.9 (1.2)a   | 24.1 (1.5)ab  | 23.6 (1.88)b  | 0.028 | 0.071 |
| 12 | Propionic Acid         | 22.3 (1.14)a  | 23.1 (1.85)a  | 23 (1.09)a    | 22.9 (1.71)a  | 0.351 | 0.462 |
| 12 | Protocatechuic Acid    | 16.8 (1.7)a   | 14.2 (2.18)b  | 16.6 (3.32)ab | 14.3 (2.5)b   | 0.022 | 0.058 |
| 12 | Putrescine             | 19.7 (2.15)a  | 18.6 (1.05)a  | 19.7 (2.01)a  | 20.5 (3.41)a  | 0.307 | 0.418 |
| 12 | Ralgin                 | 11.5 (1.56)a  | 11 (0.422)a   | 11.4 (1.11)a  | 11.3 (1.78)a  | 0.185 | 0.286 |
| 12 | Riboflavin             | 18.5 (1.02)a  | 18.5 (1.18)a  | 18.4 (0.903)a | 18.2 (0.991)a | 0.766 | 0.826 |
| 12 | sarcosine              | 23.5 (1.04)a  | 23.7 (0.513)a | 23.6 (0.902)a | 23.3 (0.936)a | 0.156 | 0.256 |
| 12 | Sebacic Acid           | 15.8 (1.52)a  | 14.8 (1.08)a  | 15 (0.735)a   | 15.8 (0.76)a  | 0.079 | 0.154 |
| 12 | Serine                 | 20.5 (1.15)a  | 20.7 (0.871)a | 20.8 (0.713)a | 20.8 (1.23)a  | 0.581 | 0.683 |
| 12 | Sinapinic Acid         | 15.1 (2.02)a  | 14 (1.67)a    | 15.3 (1.32)a  | 13.3 (2.23)a  | 0.088 | 0.165 |
| 12 | Skatole                | 8.86 (0.557)a | 9.23 (0.237)a | 9.26 (0.413)a | 9.32 (1.53)a  | 0.162 | 0.264 |
| 12 | Spermidine             | 18.7 (5.76)a  | 20.7 (1.4)b   | 20.7 (2.59)b  | 21.2 (2.39)b  | 0.026 | 0.067 |
| 12 | Spermine               | 11 (0.636)a   | 11.6 (1.34)ab | 12.3 (2.22)b  | 12.1 (2.56)ab | 0.066 | 0.134 |
| 12 | Stachydrine            | 20.1 (4.17)a  | 17.8 (1.29)a  | 19 (5.61)a    | 18.3 (3.2)a   | 0.14  | 0.233 |
| 12 | Syringic Acid          | 16.4 (2.55)a  | 13.5 (2.09)b  | 16.1 (2.68)a  | 16.7 (2.95)a  | 0.012 | 0.035 |
| 12 | Taurine                | 21.8 (1.04)a  | 22.5 (1.08)a  | 22.1 (0.991)a | 21.8 (0.642)a | 0.102 | 0.184 |
| 12 | trans-4-Hydroxyproline | 19.2 (1.42)a  | 19.2 (1.56)a  | 19.3 (0.921)a | 19.4 (1.56)a  | 0.833 | 0.876 |

On-line Supplementary Material

**Lauren Brink et al. Neonatal diet alters fecal microbiota and metabolome profiles over the first year of life in infants fed breast milk or formula.**

|    |                         |               |               |               |              |       |       |
|----|-------------------------|---------------|---------------|---------------|--------------|-------|-------|
| 12 | trans-Cinnamic Acid     | 12.9 (1.21)a  | 12.7 (0.719)a | 12.8 (0.737)a | 12.3 (0.67)a | 0.371 | 0.485 |
| 12 | Trigonelline            | 20 (1.71)a    | 19.6 (1.17)a  | 18.7 (2.68)a  | 19.5 (1.48)a | 0.503 | 0.61  |
| 12 | Trimethylamine-N-oxide  | 14.9 (2.32)a  | 14.3 (2.05)a  | 14.4 (1.27)a  | 15 (1.72)a   | 0.239 | 0.347 |
| 12 | Tyrosine                | 24.3 (0.809)a | 24.7 (1.09)a  | 24.4 (0.968)a | 24.6 (1.63)a | 0.636 | 0.724 |
| 12 | Uracil                  | 22 (0.751)a   | 21.8 (0.613)a | 22 (0.925)a   | 22 (1.81)a   | 0.76  | 0.825 |
| 12 | Uric Acid               | 14.6 (1.15)a  | 17 (2.21)b    | 15.9 (1.01)ab | 15.3 (2.6)ab | 0.079 | 0.154 |
| 12 | Urobilin                | 23.4 (1.39)a  | 23.3 (1.27)a  | 23.4 (1.6)a   | 23.5 (1.5)a  | 0.987 | 0.994 |
| 12 | Urobilinogen            | 20.6 (3.16)a  | 20.6 (2.56)a  | 21.6 (1.57)a  | 22 (3.17)a   | 0.294 | 0.404 |
| 12 | Valeric Acid            | 13.9 (2.54)a  | 16.4 (3.65)a  | 14.9 (2.64)a  | 16 (3.3)a    | 0.393 | 0.506 |
| 12 | Valine                  | 24.6 (1.41)a  | 24.9 (1.15)a  | 24.6 (1.24)a  | 24.1 (1.34)a | 0.47  | 0.582 |
| 12 | γ-Glutamylphenylalanine | 15.1 (1.88)a  | 15 (2)a       | 15.3 (1.77)a  | 15.4 (1.56)a | 0.881 | 0.912 |

<sup>1</sup> Data are log transformed peak areas and presented as median (25<sup>th</sup> quartile, 75<sup>th</sup> quartile). Differences in diet were assessed by Kruskal-Wallis test on percent abundances. Post-hoc analysis of pairwise differences in diet were assessed by Dunn's test. Medians without a common letter differ. FDR calculated by Benjamini and Hochberg false discovery rate procedure. BF = Breast-fed, MF = milk formula fed, NLB = no longer breastfeeding, SF = soy formula fed.

On-line Supplementary Material

**Lauren Brink et al. Neonatal diet alters fecal microbiota and metabolome profiles over the first year of life in infants fed breast milk or formula.**

**Supplementary Table 6:** Fecal alpha-diversity indices at three, six, nine, and 12 months of age in infants fed with breastmilk or formula diets<sup>1</sup>

| Diversity indices | Age | Diet | Time:Diet Interaction | Sex | Birth Weight |
|-------------------|-----|------|-----------------------|-----|--------------|
| <i>Observed</i>   | **  | **   |                       |     |              |
| <i>Chao1</i>      |     | *    |                       |     |              |
| <i>Shannon</i>    |     | **   |                       | *   |              |
| <i>Simpson</i>    |     | **   |                       | *   |              |

<sup>1</sup>Differences in dietary intake assessed by two-way ANCOVA, blocked for gender, and birth weight as covariate. *P*-value provided for main effects of Age and Diet, interaction, blocking variable (Sex), and covariate (Birth weight). \* *P* < 0.05, \*\* *P* < 0.01. Sample sizes range from 10 to 20 per diet group at three, six, nine and 12 months of age.

On-line Supplementary Material  
**Lauren Brink et al. Neonatal diet alters fecal microbiota and metabolome profiles over the first year of life in infants fed breast milk or formula.**

**Supplementary Table 7:** Beta-diversity was altered by infant age and diet.<sup>1</sup>

| Coefficients | Degrees of Freedom | Time   | Index | F-model | R2    | <i>P<sub>adj</sub></i> |
|--------------|--------------------|--------|-------|---------|-------|------------------------|
| Age          | 3                  | 2.378  | 0.793 | 4.266   | 0.061 | 0.013                  |
| Diet         | 3                  | 2.970  | 0.990 | 5.329   | 0.076 | 0.013                  |
| Gender       | 1                  | 0.506  | 0.506 | 2.725   | 0.013 | 0.050                  |
| Birth Weight | 1                  | 0.245  | 0.245 | 1.319   | 0.006 | 0.478                  |
| Time:Diet    | 6                  | 1.365  | 0.227 | 1.224   | 0.035 | 0.409                  |
| Residuals    | 169                | 31.402 | 0.186 |         | 0.808 |                        |
| Total        | 183                | 38.867 |       |         | 1     |                        |

<sup>1</sup> Permutational Multivariate ANOVA (PERMANOVA) table output using the `adonis()` function from the R `vegan` package. Beta-diversity estimated using Bray-Curtis Dissimilarities. PERMANOVA tested main effects of age and diet, covariate (Birth weight), and blocking variable (Gender). P-values represented adjusted p-values based on Benjamini and Hochberg's false discovery rate correction.

**Lauren Brink et al. Neonatal diet alters fecal microbiota and metabolome profiles over the first year of life in infants fed breast milk or formula.**

**Supplementary Table 8:** Principal component analysis of metabolites at three, six, nine

| Diet      | diff    | lwr     | upr    | p adj  | Age      | PC1    | PC2    |
|-----------|---------|---------|--------|--------|----------|--------|--------|
| MF vs BF  | 5.718   | 3.511   | 7.926  | <0.001 | month 3  | <0.001 | 0.020  |
| SF vs BF  | 15.0312 | 13.157  | 16.904 | <0.001 | month 3  | <0.001 | 0.020  |
| SF vs MF  | 9.312   | 7.194   | 11.429 | <0.001 | month 3  | <0.001 | 0.020  |
| MF vs BF  | -7.999  | -11.135 | -4.862 | <0.001 | month 6  | <0.001 | 0.027  |
| SF vs BF  | -13.039 | -16.326 | -9.753 | <0.001 | month 6  | <0.001 | 0.027  |
| SF vs MF  | -5.040  | -8.067  | -2.014 | <0.001 | month 6  | <0.001 | 0.027  |
| MF vs BF  | -2.591  | -6.569  | 1.385  | 0.262  | month 9  | <0.001 | <0.001 |
| SF vs BF  | -8.978  | -12.956 | -5.001 | <0.001 | month 9  | <0.001 | <0.001 |
| SF vs MF  | -6.386  | -10.564 | -2.208 | 0.001  | month 9  | <0.001 | <0.001 |
| MF vs BF  | 4.978   | -0.164  | 10.121 | 0.061  | month 12 | 0.086  | 0.130  |
| NLB vs BF | 2.601   | -3.032  | 8.235  | 0.611  | month 12 | 0.086  | 0.130  |
| SF vs BF  | 3.427   | -1.715  | 8.570  | 0.298  | month 12 | 0.086  | 0.130  |
| NLB vs MF | -2.376  | -8.010  | 3.256  | 0.677  | month 12 | 0.086  | 0.130  |
| SF vs MF  | -1.551  | -6.694  | 3.591  | 0.852  | month 12 | 0.086  | 0.130  |
| SF vs NLB | 0.825   | -4.808  | 6.459  | 0.979  | month 12 | 0.086  | 0.130  |

and 12 months in infants fed with breastmilk, milk or soy formula diets<sup>1</sup>.

<sup>1</sup>The column titled diff is the difference in means, lwr/upr are the 95<sup>th</sup> interval bounds, padj is the adjusted *P* value for the pairwise comparison, PC1 and PC2 are *P* values of the overall ANOVA. BF = Breast-fed, MF = milk formula fed, NLB = no longer breastfeeding, SF = soy formula fed.

On-line Supplementary Material  
**Lauren Brink et al. Neonatal diet alters fecal microbiota and metabolome profiles over the first year of life in infants fed breast milk or formula.**

**Supplementary Table 9:** Significant Pearson's correlations between fecal genera level taxa and metabolites at three, six, nine and twelve months of age.<sup>1</sup>

| <b>3-Months</b>          |                                |             |          |            |
|--------------------------|--------------------------------|-------------|----------|------------|
| <b>Genus</b>             | <b>Metabolite</b>              | <b>Coef</b> | <b>P</b> | <b>FDR</b> |
| Streptococcus            | 2-Phenylacetic Acid            | 0.685       | <0.001   | 0.023      |
| Streptococcus            | 3-Methylthiopropionic Acid     | 0.697       | <0.001   | 0.020      |
| SMB53                    | Azelaic Acid                   | 0.649       | <0.001   | 0.049      |
| f__Ruminococcaceae       | Azelaic Acid                   | 0.648       | <0.001   | 0.049      |
| f__Clostridiaceae        | Dihydroferulic Acid            | 0.672       | <0.001   | 0.032      |
| SMB53                    | Gentisic acid                  | 0.702       | <0.001   | 0.019      |
| f__Ruminococcaceae       | Gentisic acid                  | 0.644       | <0.001   | 0.049      |
| f__Ruminococcaceae       | Isocitric Acid                 | 0.645       | <0.001   | 0.049      |
| Streptococcus            | 3-Methylxanthine               | -0.814      | <0.001   | 0.001      |
| Veillonella              | 3-Methylxanthine               | -0.705      | <0.001   | 0.019      |
| f__Ruminococcaceae       | 3-Methylxanthine               | -0.743      | <0.001   | 0.015      |
| f__Clostridiaceae        | 3-Methylxanthine               | -0.687      | <0.001   | 0.023      |
| Streptococcus            | Caffeine                       | -0.727      | <0.001   | 0.015      |
| Veillonella              | Caffeine                       | -0.642      | <0.001   | 0.049      |
| f__Peptostreptococcaceae | D6-trans-Cinnamic Acid         | -0.662      | <0.001   | 0.036      |
| Streptococcus            | D6-trans-Cinnamic Acid         | -0.663      | <0.001   | 0.036      |
| SMB53                    | D6-trans-Cinnamic Acid         | -0.728      | <0.001   | 0.015      |
| Streptococcus            | Ethanolamine                   | -0.705      | <0.001   | 0.019      |
| SMB53                    | Ethanolamine                   | -0.726      | <0.001   | 0.015      |
| Streptococcus            | Isovaleric Acid                | 0.669       | <0.001   | 0.032      |
| SMB53                    | Jasmonic acid                  | 0.686       | <0.001   | 0.023      |
| Streptococcus            | Phenylacetic Acid              | 0.681       | <0.001   | 0.025      |
| SMB53                    | Sebacic Acid                   | 0.710       | <0.001   | 0.019      |
| f__Ruminococcaceae       | Sebacic Acid                   | 0.700       | <0.001   | 0.019      |
| f__Ruminococcaceae       | Syringic Acid                  | 0.642       | <0.001   | 0.049      |
| <b>6-Months</b>          |                                |             |          |            |
| <b>Genus</b>             | <b>Metabolite</b>              | <b>Coef</b> | <b>P</b> | <b>FDR</b> |
| Oscillospira             | (S)-3,4-Dihydroxybutyric Acid  | -0.514      | <0.001   | 0.011      |
| Enterococcus             | 2-Hydroxy-3-methylbutyric Acid | 0.431       | 0.003    | 0.040      |
| f__Peptostreptococcaceae | 2-Hydroxy-3-methylbutyric Acid | -0.457      | 0.002    | 0.029      |
| f__Enterobacteriaceae    | 2-Hydroxy-3-methylbutyric Acid | 0.446       | 0.002    | 0.033      |
| SMB53                    | 2-Hydroxy-3-methylbutyric Acid | -0.493      | 0.001    | 0.016      |
| f__Clostridiaceae        | 2-Hydroxy-3-methylbutyric Acid | -0.423      | 0.004    | 0.045      |
| f__Lachnospiraceae       | 2-Hydroxy-3-methylbutyric Acid | -0.451      | 0.002    | 0.031      |
| Oscillospira             | 2-Hydroxy-3-methylbutyric Acid | -0.509      | <0.001   | 0.013      |

On-line Supplementary Material  
**Lauren Brink et al. Neonatal diet alters fecal microbiota and metabolome profiles over the first year of life in infants fed breast milk or formula.**

|                          |                            |        |        |       |
|--------------------------|----------------------------|--------|--------|-------|
| Coprococcus              | 2-Hydroxyadipic Acid       | -0.508 | <0.001 | 0.013 |
| f__Peptostreptococcaceae | 2-Hydroxyadipic Acid       | -0.433 | 0.003  | 0.039 |
| [Clostridium]            | 2-Hydroxyadipic Acid       | -0.489 | 0.001  | 0.017 |
| SMB53                    | 2-Hydroxyadipic Acid       | -0.488 | 0.001  | 0.018 |
| f__Erysipelotrichaceae   | 2-Hydroxyadipic Acid       | -0.471 | 0.001  | 0.024 |
| f__Lachnospiraceae       | 2-Hydroxyadipic Acid       | -0.528 | <0.001 | 0.009 |
| Oscillospira             | 2-Hydroxyadipic Acid       | -0.650 | <0.001 | 0.001 |
| [Ruminococcus]           | 2-Oxoglutaric Acid         | -0.451 | 0.002  | 0.031 |
| f__Erysipelotrichaceae   | 2-Oxoglutaric Acid         | -0.518 | <0.001 | 0.011 |
| f__Lachnospiraceae       | 2-Oxoglutaric Acid         | -0.515 | <0.001 | 0.011 |
| f__Peptostreptococcaceae | 2-Phenylacetic Acid        | 0.493  | 0.001  | 0.016 |
| SMB53                    | 2-Phenylacetic Acid        | 0.424  | 0.004  | 0.044 |
| [Eubacterium]            | 2-Phenylacetic Acid        | 0.617  | <0.001 | 0.001 |
| f__Lachnospiraceae       | 2-Phenylacetic Acid        | 0.599  | <0.001 | 0.002 |
| Oscillospira             | 2-Phenylacetic Acid        | 0.520  | <0.001 | 0.010 |
| Oscillospira             | 3-Dehydroshikimic acid     | -0.638 | <0.001 | 0.001 |
| f__Peptostreptococcaceae | 3-Hydroxybutyric Acid      | -0.459 | 0.002  | 0.028 |
| f__Erysipelotrichaceae   | 3-Hydroxybutyric Acid      | -0.460 | 0.002  | 0.028 |
| [Eubacterium]            | 3-Hydroxybutyric Acid      | -0.494 | 0.001  | 0.016 |
| Oscillospira             | 3-Hydroxybutyric Acid      | -0.606 | <0.001 | 0.001 |
| o__Clostridiales         | 3-Methyl-2-oxobutyric Acid | -0.497 | 0.001  | 0.016 |
| f__Peptostreptococcaceae | 3-Methyl-2-oxobutyric Acid | -0.449 | 0.002  | 0.031 |
| SMB53                    | 3-Methyl-2-oxobutyric Acid | -0.459 | 0.002  | 0.028 |
| Bifidobacterium          | 3-Methyl-2-oxobutyric Acid | 0.441  | 0.003  | 0.035 |
| f__Ruminococcaceae       | 3-Methyl-2-oxobutyric Acid | -0.466 | 0.001  | 0.026 |
| f__Erysipelotrichaceae   | 3-Methyl-2-oxobutyric Acid | -0.426 | 0.004  | 0.042 |
| Blautia                  | 3-Methyl-2-oxobutyric Acid | -0.513 | <0.001 | 0.011 |
| f__Lachnospiraceae       | 3-Methyl-2-oxobutyric Acid | -0.544 | <0.001 | 0.006 |
| f__Peptostreptococcaceae | 3-Methylthiopropionic Acid | 0.559  | <0.001 | 0.004 |
| [Ruminococcus]           | 3-Methylthiopropionic Acid | 0.455  | 0.002  | 0.030 |
| SMB53                    | 3-Methylthiopropionic Acid | 0.523  | <0.001 | 0.010 |
| f__Erysipelotrichaceae   | 3-Methylthiopropionic Acid | 0.517  | <0.001 | 0.011 |
| [Eubacterium]            | 3-Methylthiopropionic Acid | 0.604  | <0.001 | 0.002 |
| f__Lachnospiraceae       | 3-Methylthiopropionic Acid | 0.567  | <0.001 | 0.004 |
| Oscillospira             | 3-Methylthiopropionic Acid | 0.584  | <0.001 | 0.003 |
| Enterococcus             | 3-O-Methyl-Gallic Acid     | -0.444 | 0.003  | 0.034 |
| o__Clostridiales         | 3-O-Methyl-Gallic Acid     | 0.524  | <0.001 | 0.010 |
| Roseburia                | 3-O-Methyl-Gallic Acid     | 0.427  | 0.004  | 0.042 |
| Blautia                  | 3-O-Methyl-Gallic Acid     | 0.434  | 0.003  | 0.038 |
| f__Erysipelotrichaceae   | 4-Hydroxybenzoic Acid      | 0.448  | 0.002  | 0.032 |



On-line Supplementary Material  
**Lauren Brink et al. Neonatal diet alters fecal microbiota and metabolome profiles over the first year of life in infants fed breast milk or formula.**

|                          |                                     |        |        |        |
|--------------------------|-------------------------------------|--------|--------|--------|
| f__Peptostreptococcaceae | 4-Hydroxyphenylacetic Acid          | 0.504  | <0.001 | 0.014  |
| [Clostridium]            | 4-Hydroxyphenylacetic Acid          | 0.479  | 0.001  | 0.021  |
| SMB53                    | 4-Hydroxyphenylacetic Acid          | 0.482  | 0.001  | 0.020  |
| f__Lachnospiraceae       | 4-Hydroxyphenylacetic Acid          | 0.460  | 0.002  | 0.028  |
| f__Peptostreptococcaceae | a-hydroxyisocaproic acid            | -0.419 | 0.005  | 0.046  |
| SMB53                    | a-hydroxyisocaproic acid            | -0.490 | 0.001  | 0.017  |
| f__Clostridiaceae        | a-hydroxyisocaproic acid            | -0.434 | 0.003  | 0.039  |
| f__Peptostreptococcaceae | Adenine                             | -0.555 | <0.001 | 0.005  |
| SMB53                    | Adenine                             | -0.484 | 0.001  | 0.019  |
| Enterococcus             | Azelaic Acid                        | -0.441 | 0.003  | 0.035  |
| o__Clostridiales         | Azelaic Acid                        | 0.547  | <0.001 | 0.006  |
| f__Peptostreptococcaceae | Azelaic Acid                        | 0.586  | <0.001 | 0.002  |
| SMB53                    | Azelaic Acid                        | 0.561  | <0.001 | 0.004  |
| Bifidobacterium          | Azelaic Acid                        | -0.483 | 0.001  | 0.019  |
| f__Erysipelotrichaceae   | Azelaic Acid                        | 0.427  | 0.004  | 0.042  |
| Blautia                  | Azelaic Acid                        | 0.453  | 0.002  | 0.030  |
| f__Lachnospiraceae       | Azelaic Acid                        | 0.439  | 0.003  | 0.036  |
| Oscillospira             | Azelaic Acid                        | 0.442  | 0.003  | 0.035  |
| f__Peptostreptococcaceae | Citric Acid                         | -0.458 | 0.002  | 0.028  |
| [Clostridium]            | Citric Acid                         | -0.439 | 0.003  | 0.036  |
| f__Erysipelotrichaceae   | Citric Acid                         | -0.449 | 0.002  | 0.031  |
| [Eubacterium]            | Citric Acid                         | -0.542 | <0.001 | 0.007  |
| f__Lachnospiraceae       | Citric Acid                         | -0.585 | <0.001 | 0.002  |
| Oscillospira             | Citric Acid                         | -0.717 | <0.001 | <0.001 |
| f__Peptostreptococcaceae | Cysteine                            | -0.434 | 0.003  | 0.039  |
| SMB53                    | Cysteine                            | -0.446 | 0.002  | 0.033  |
| f__Erysipelotrichaceae   | Cysteine                            | -0.454 | 0.002  | 0.030  |
| [Eubacterium]            | Cysteine                            | -0.502 | 0.001  | 0.014  |
| f__Lachnospiraceae       | Cysteine                            | -0.609 | <0.001 | 0.001  |
| Oscillospira             | Cysteine                            | -0.647 | <0.001 | 0.001  |
| f__Erysipelotrichaceae   | Dihydro-Isoferulic acid-glucuronide | 0.461  | 0.002  | 0.028  |
| Enterococcus             | Dihydrocaffeic acid                 | -0.450 | 0.002  | 0.031  |
| Bifidobacterium          | Dihydrocaffeic acid                 | -0.528 | <0.001 | 0.009  |
| [Eubacterium]            | Dihydroferulic Acid                 | 0.537  | <0.001 | 0.007  |
| Oscillospira             | Dihydroferulic Acid                 | 0.427  | 0.004  | 0.042  |
| f__Peptostreptococcaceae | Dihydroferulic Acid-4-Sulfate       | -0.423 | 0.004  | 0.045  |
| SMB53                    | Dihydroferulic Acid-4-Sulfate       | -0.446 | 0.002  | 0.033  |
| [Eubacterium]            | Dihydroferulic Acid-4-Sulfate       | -0.451 | 0.002  | 0.031  |
| f__Lachnospiraceae       | Dihydroferulic Acid-4-Sulfate       | -0.437 | 0.003  | 0.037  |
| Oscillospira             | Dihydroferulic Acid-4-Sulfate       | -0.662 | <0.001 | <0.001 |

On-line Supplementary Material  
**Lauren Brink et al. Neonatal diet alters fecal microbiota and metabolome profiles over the first year of life in infants fed breast milk or formula.**

|                          |                              |        |        |        |
|--------------------------|------------------------------|--------|--------|--------|
| o__Clostridiales         | Gentisic acid                | 0.422  | 0.004  | 0.045  |
| f__Peptostreptococcaceae | Gentisic acid                | 0.432  | 0.003  | 0.039  |
| [Ruminococcus]           | Gentisic acid                | 0.431  | 0.004  | 0.040  |
| SMB53                    | Gentisic acid                | 0.431  | 0.003  | 0.040  |
| f__Erysipelotrichaceae   | Gentisic acid                | 0.525  | <0.001 | 0.010  |
| f__Lachnospiraceae       | Gentisic acid                | 0.513  | <0.001 | 0.011  |
| Oscillospira             | Gluconic Acid                | -0.468 | 0.001  | 0.025  |
| Coprococcus              | glucose                      | -0.458 | 0.002  | 0.028  |
| [Clostridium]            | glucose                      | -0.464 | 0.002  | 0.027  |
| f__Erysipelotrichaceae   | glucose                      | -0.530 | <0.001 | 0.009  |
| Blautia                  | glucose                      | -0.456 | 0.002  | 0.029  |
| f__Lachnospiraceae       | glucose                      | -0.576 | <0.001 | 0.003  |
| Oscillospira             | glucose                      | -0.527 | <0.001 | 0.009  |
| f__Peptostreptococcaceae | GUDCA                        | 0.438  | 0.003  | 0.036  |
| [Ruminococcus]           | GUDCA                        | 0.488  | 0.001  | 0.018  |
| [Eubacterium]            | GUDCA                        | 0.592  | <0.001 | 0.002  |
| Oscillospira             | GUDCA                        | 0.505  | <0.001 | 0.014  |
| o__Clostridiales         | Hydroxyphenyllactic Acid     | -0.469 | 0.001  | 0.025  |
| f__Peptostreptococcaceae | Hydroxyphenyllactic Acid     | -0.486 | 0.001  | 0.018  |
| SMB53                    | Hydroxyphenyllactic Acid     | -0.511 | <0.001 | 0.012  |
| f__Lachnospiraceae       | Hydroxyphenyllactic Acid     | -0.441 | 0.003  | 0.035  |
| Oscillospira             | Hydroxyphenyllactic Acid     | -0.663 | <0.001 | <0.001 |
| o__Clostridiales         | Isocitric Acid               | 0.435  | 0.003  | 0.038  |
| f__Bifidobacteriaceae    | Isocitric Acid               | -0.436 | 0.003  | 0.037  |
| Bifidobacterium          | Isocitric Acid               | -0.445 | 0.002  | 0.033  |
| f__Erysipelotrichaceae   | Isoleucine                   | 0.455  | 0.002  | 0.030  |
| [Eubacterium]            | Isoleucine                   | 0.504  | <0.001 | 0.014  |
| f__Lachnospiraceae       | Isoleucine                   | 0.432  | 0.003  | 0.039  |
| Oscillospira             | Isoleucine                   | 0.427  | 0.004  | 0.042  |
| o__Clostridiales         | Lactic Acid                  | -0.466 | 0.001  | 0.026  |
| f__Peptostreptococcaceae | Lactic Acid                  | -0.540 | <0.001 | 0.007  |
| SMB53                    | Lactic Acid                  | -0.591 | <0.001 | 0.002  |
| f__Erysipelotrichaceae   | Lactic Acid                  | -0.501 | 0.001  | 0.014  |
| [Eubacterium]            | Lactic Acid                  | -0.426 | 0.004  | 0.043  |
| Blautia                  | Lactic Acid                  | -0.469 | 0.001  | 0.025  |
| f__Lachnospiraceae       | Lactic Acid                  | -0.663 | <0.001 | <0.001 |
| Oscillospira             | Lactic Acid                  | -0.637 | <0.001 | 0.001  |
| o__Clostridiales         | m-hydroxy-hydrocinnamic acid | -0.537 | <0.001 | 0.007  |
| f__Peptostreptococcaceae | m-hydroxy-hydrocinnamic acid | -0.559 | <0.001 | 0.004  |
| f__Enterobacteriaceae    | m-hydroxy-hydrocinnamic acid | 0.517  | <0.001 | 0.011  |
| Roseburia                | m-hydroxy-hydrocinnamic acid | -0.493 | 0.001  | 0.016  |

On-line Supplementary Material  
**Lauren Brink et al. Neonatal diet alters fecal microbiota and metabolome profiles over the first year of life in infants fed breast milk or formula.**

|                          |                              |        |        |        |
|--------------------------|------------------------------|--------|--------|--------|
| SMB53                    | m-hydroxy-hydrocinnamic acid | -0.566 | <0.001 | 0.004  |
| f__Lachnospiraceae       | m-hydroxy-hydrocinnamic acid | -0.594 | <0.001 | 0.002  |
| Oscillospira             | m-hydroxy-hydrocinnamic acid | -0.639 | <0.001 | 0.001  |
| Bifidobacterium          | Methyl-2-oxovaleric Acid     | 0.441  | 0.003  | 0.035  |
| f__Ruminococcaceae       | Methyl-2-oxovaleric Acid     | -0.417 | 0.005  | 0.048  |
| Blautia                  | Methyl-2-oxovaleric Acid     | -0.432 | 0.003  | 0.039  |
| Coprococcus              | Methylmalonic Acid           | -0.619 | <0.001 | 0.001  |
| SMB53                    | Methylmalonic Acid           | -0.461 | 0.002  | 0.028  |
| Dorea                    | Methylmalonic Acid           | -0.580 | <0.001 | 0.003  |
| f__Clostridiaceae        | Methylmalonic Acid           | -0.424 | 0.004  | 0.044  |
| f__Lachnospiraceae       | Methylmalonic Acid           | -0.454 | 0.002  | 0.030  |
| o__Clostridiales         | o-Hydroxyhippuric acid       | -0.432 | 0.003  | 0.039  |
| [Ruminococcus]           | o-Hydroxyhippuric acid       | -0.462 | 0.002  | 0.028  |
| SMB53                    | o-Hydroxyhippuric acid       | -0.436 | 0.003  | 0.037  |
| f__Ruminococcaceae       | o-Hydroxyhippuric acid       | -0.439 | 0.003  | 0.036  |
| f__Erysipelotrichaceae   | o-Hydroxyhippuric acid       | -0.435 | 0.003  | 0.038  |
| Blautia                  | o-Hydroxyhippuric acid       | -0.432 | 0.003  | 0.039  |
| f__Lachnospiraceae       | o-Hydroxyhippuric acid       | -0.670 | <0.001 | <0.001 |
| Oscillospira             | o-Hydroxyhippuric acid       | -0.670 | <0.001 | <0.001 |
| f__Peptostreptococcaceae | O-Phospho-L-serine           | -0.465 | 0.001  | 0.026  |
| Streptococcus            | O-Phospho-L-serine           | 0.498  | 0.001  | 0.016  |
| [Ruminococcus]           | O-Phospho-L-serine           | -0.552 | <0.001 | 0.005  |
| f__Erysipelotrichaceae   | O-Phospho-L-serine           | -0.441 | 0.003  | 0.035  |
| [Eubacterium]            | O-Phospho-L-serine           | -0.496 | 0.001  | 0.016  |
| f__Lachnospiraceae       | O-Phospho-L-serine           | -0.511 | <0.001 | 0.012  |
| Oscillospira             | O-Phospho-L-serine           | -0.685 | <0.001 | <0.001 |
| f__Erysipelotrichaceae   | Octadecanedioic Acid         | 0.434  | 0.003  | 0.038  |
| Oscillospira             | Orotic Acid                  | -0.495 | 0.001  | 0.016  |
| Faecalibacterium         | p-Coumaric acid              | 0.429  | 0.004  | 0.041  |
| o__Clostridiales         | Pyrocatechol                 | 0.452  | 0.002  | 0.031  |
| f__Peptostreptococcaceae | Pyrocatechol                 | 0.507  | <0.001 | 0.013  |
| [Ruminococcus]           | Pyrocatechol                 | 0.482  | 0.001  | 0.019  |
| Roseburia                | Pyrocatechol                 | 0.444  | 0.003  | 0.034  |
| SMB53                    | Pyrocatechol                 | 0.514  | <0.001 | 0.011  |
| f__Lachnospiraceae       | Pyrocatechol                 | 0.560  | <0.001 | 0.004  |
| o__Clostridiales         | Pyruvic acid                 | -0.438 | 0.003  | 0.037  |
| Coprococcus              | Pyruvic acid                 | -0.457 | 0.002  | 0.029  |
| f__Peptostreptococcaceae | Pyruvic acid                 | -0.539 | <0.001 | 0.007  |
| [Ruminococcus]           | Pyruvic acid                 | -0.433 | 0.003  | 0.039  |
| SMB53                    | Pyruvic acid                 | -0.566 | <0.001 | 0.004  |
| f__Ruminococcaceae       | Pyruvic acid                 | -0.489 | 0.001  | 0.017  |

On-line Supplementary Material  
**Lauren Brink et al. Neonatal diet alters fecal microbiota and metabolome profiles over the first year of life in infants fed breast milk or formula.**

|                          |                             |        |        |        |
|--------------------------|-----------------------------|--------|--------|--------|
| f__Erysipelotrichaceae   | Pyruvic acid                | -0.622 | <0.001 | 0.001  |
| [Eubacterium]            | Pyruvic acid                | -0.426 | 0.004  | 0.043  |
| f__Lachnospiraceae       | Pyruvic acid                | -0.568 | <0.001 | 0.004  |
| Oscillospira             | Pyruvic acid                | -0.673 | <0.001 | <0.001 |
| Coprococcus              | Rutin                       | -0.424 | 0.004  | 0.044  |
| Coprococcus              | Shikimic Acid               | -0.503 | <0.001 | 0.014  |
| f__Peptostreptococcaceae | Shikimic Acid               | -0.439 | 0.003  | 0.036  |
| [Clostridium]            | Shikimic Acid               | -0.421 | 0.004  | 0.045  |
| Oscillospira             | Shikimic Acid               | -0.609 | <0.001 | 0.001  |
| [Eubacterium]            | Sucrose                     | 0.420  | 0.005  | 0.046  |
| f__Peptostreptococcaceae | TCDCA                       | 0.493  | 0.001  | 0.016  |
| [Ruminococcus]           | TCDCA                       | 0.426  | 0.004  | 0.043  |
| [Ruminococcus]           | TDCA                        | 0.453  | 0.002  | 0.030  |
| Blautia                  | TDCA                        | 0.491  | 0.001  | 0.017  |
| Enterococcus             | Tyrosol                     | -0.421 | 0.004  | 0.045  |
| Coprococcus              | Tyrosol                     | 0.497  | 0.001  | 0.016  |
| f__Peptostreptococcaceae | Tyrosol                     | 0.443  | 0.003  | 0.034  |
| Roseburia                | Tyrosol                     | 0.417  | 0.005  | 0.048  |
| SMB53                    | Tyrosol                     | 0.440  | 0.003  | 0.036  |
| [Ruminococcus]           | Uric Acid                   | -0.476 | 0.001  | 0.022  |
| Enterococcus             | (-)-Epicatechin             | 0.601  | <0.001 | 0.002  |
| [Ruminococcus]           | 1-Methylhydantoin           | -0.507 | <0.001 | 0.013  |
| SMB53                    | 1-Methylhydantoin           | -0.440 | 0.003  | 0.036  |
| Bifidobacterium          | 1-Methylhydantoin           | 0.620  | <0.001 | 0.001  |
| f__Erysipelotrichaceae   | 1-Methylhydantoin           | -0.497 | 0.001  | 0.016  |
| Oscillospira             | 1-Methylhydantoin           | -0.607 | <0.001 | 0.001  |
| [Eubacterium]            | 1-Methyluric Acid           | -0.452 | 0.002  | 0.031  |
| Oscillospira             | 1-Methyluric Acid           | -0.490 | 0.001  | 0.017  |
| Faecalibacterium         | 2-Aminophenol               | 0.437  | 0.003  | 0.037  |
| o__Clostridiales         | 3-Methylxanthine            | -0.431 | 0.004  | 0.040  |
| Coprococcus              | 3-Methylxanthine            | -0.526 | <0.001 | 0.009  |
| f__Peptostreptococcaceae | 3-Methylxanthine            | -0.457 | 0.002  | 0.029  |
| SMB53                    | 3-Methylxanthine            | -0.459 | 0.002  | 0.028  |
| f__Erysipelotrichaceae   | 3-Methylxanthine            | -0.593 | <0.001 | 0.002  |
| Blautia                  | 3-Methylxanthine            | -0.426 | 0.004  | 0.043  |
| f__Lachnospiraceae       | 3-Methylxanthine            | -0.612 | <0.001 | 0.001  |
| Oscillospira             | 3-Methylxanthine            | -0.532 | <0.001 | 0.008  |
| o__Clostridiales         | 4-Hydroxyphenylpyruvic Acid | 0.491  | 0.001  | 0.017  |
| f__Peptostreptococcaceae | 4-Hydroxyphenylpyruvic Acid | 0.445  | 0.002  | 0.034  |
| [Ruminococcus]           | 4-Hydroxyphenylpyruvic Acid | 0.474  | 0.001  | 0.023  |
| SMB53                    | 4-Hydroxyphenylpyruvic Acid | 0.443  | 0.003  | 0.035  |

On-line Supplementary Material  
**Lauren Brink et al. Neonatal diet alters fecal microbiota and metabolome profiles over the first year of life in infants fed breast milk or formula.**

|                          |                             |        |        |       |
|--------------------------|-----------------------------|--------|--------|-------|
| Bifidobacterium          | 4-Hydroxyphenylpyruvic Acid | -0.593 | <0.001 | 0.002 |
| f__Erysipelotrichaceae   | 4-Hydroxyphenylpyruvic Acid | 0.447  | 0.002  | 0.033 |
| Blautia                  | 4-Hydroxyphenylpyruvic Acid | 0.431  | 0.004  | 0.040 |
| f__Lachnospiraceae       | 4-Hydroxyphenylpyruvic Acid | 0.435  | 0.003  | 0.038 |
| Coprococcus              | 4-Imidazoleacrylic Acid     | 0.421  | 0.004  | 0.045 |
| f__Clostridiaceae        | 4-Imidazoleacrylic Acid     | 0.453  | 0.002  | 0.030 |
| Oscillospira             | 4-Imidazoleacrylic Acid     | 0.463  | 0.002  | 0.028 |
| Blautia                  | 4-Imidazolecarboxylic Acid  | -0.416 | 0.005  | 0.050 |
| f__Lachnospiraceae       | 4-Imidazolecarboxylic Acid  | -0.495 | 0.001  | 0.016 |
| f__Peptostreptococcaceae | 5-Hydroxytryptamine         | 0.423  | 0.004  | 0.045 |
| [Ruminococcus]           | 5-Hydroxytryptamine         | 0.614  | <0.001 | 0.001 |
| [Clostridium]            | 5-Hydroxytryptamine         | 0.444  | 0.003  | 0.034 |
| SMB53                    | 5-Hydroxytryptamine         | 0.442  | 0.003  | 0.035 |
| Bifidobacterium          | 5-Hydroxytryptamine         | -0.591 | <0.001 | 0.002 |
| f__Erysipelotrichaceae   | 5-Hydroxytryptamine         | 0.522  | <0.001 | 0.010 |
| f__Lachnospiraceae       | 5-Hydroxytryptamine         | 0.531  | <0.001 | 0.008 |
| Oscillospira             | 5-Hydroxytryptamine         | 0.488  | 0.001  | 0.018 |
| Parabacteroides          | 5-Hydroxytryptamine         | -0.450 | 0.002  | 0.031 |
| Roseburia                | Asparagine                  | 0.464  | 0.001  | 0.027 |
| Blautia                  | Aspartic Acid               | 0.494  | 0.001  | 0.016 |
| f__Lachnospiraceae       | Aspartic Acid               | 0.480  | 0.001  | 0.020 |
| Faecalibacterium         | Aspartic Acid               | 0.469  | 0.001  | 0.025 |
| [Eubacterium]            | Betaine                     | -0.497 | 0.001  | 0.016 |
| Oscillospira             | Betaine                     | -0.568 | <0.001 | 0.004 |
| Dorea                    | C18-Carnitine               | -0.428 | 0.004  | 0.042 |
| f__Erysipelotrichaceae   | C18-Carnitine               | -0.422 | 0.004  | 0.045 |
| f__Lachnospiraceae       | C18-Carnitine               | -0.478 | 0.001  | 0.021 |
| Oscillospira             | C18-Carnitine               | -0.582 | <0.001 | 0.003 |
| f__Erysipelotrichaceae   | Caffeine                    | -0.539 | <0.001 | 0.007 |
| Blautia                  | Caffeine                    | -0.461 | 0.002  | 0.028 |
| f__Lachnospiraceae       | Caffeine                    | -0.526 | <0.001 | 0.009 |
| Oscillospira             | Caffeine                    | -0.460 | 0.002  | 0.028 |
| Coprococcus              | Creatine                    | -0.468 | 0.001  | 0.025 |
| [Eubacterium]            | Creatine                    | -0.455 | 0.002  | 0.030 |
| f__Lachnospiraceae       | Creatine                    | -0.460 | 0.002  | 0.028 |
| Oscillospira             | Creatine                    | -0.625 | <0.001 | 0.001 |
| Roseburia                | Cystine                     | -0.421 | 0.004  | 0.045 |
| f__Lachnospiraceae       | Cystine                     | -0.587 | <0.001 | 0.002 |
| Oscillospira             | D-Sphingosine               | -0.493 | 0.001  | 0.016 |
| o__Clostridiales         | D6-trans-Cinnamic Acid      | -0.437 | 0.003  | 0.037 |
| Bifidobacterium          | D6-trans-Cinnamic Acid      | 0.568  | <0.001 | 0.004 |

On-line Supplementary Material  
**Lauren Brink et al. Neonatal diet alters fecal microbiota and metabolome profiles over the first year of life in infants fed breast milk or formula.**

|                          |                        |        |        |       |
|--------------------------|------------------------|--------|--------|-------|
| Blautia                  | D6-trans-Cinnamic Acid | -0.481 | 0.001  | 0.020 |
| Oscillospira             | D6-trans-Cinnamic Acid | -0.437 | 0.003  | 0.037 |
| [Ruminococcus]           | Dopamine               | 0.472  | 0.001  | 0.024 |
| f__Erysipelotrichaceae   | Dopamine               | 0.459  | 0.002  | 0.028 |
| f__Lachnospiraceae       | Dopamine               | 0.571  | <0.001 | 0.004 |
| Coprococcus              | Ergothioneine          | -0.431 | 0.003  | 0.040 |
| f__Lachnospiraceae       | Ergothioneine          | -0.432 | 0.003  | 0.039 |
| Coprococcus              | Ethanolamine           | -0.445 | 0.002  | 0.033 |
| f__Peptostreptococcaceae | Ethanolamine           | -0.476 | 0.001  | 0.022 |
| Bacteroides              | Ethanolamine           | 0.631  | <0.001 | 0.001 |
| SMB53                    | Ethanolamine           | -0.525 | <0.001 | 0.009 |
| f__Clostridiaceae        | Ethanolamine           | -0.492 | 0.001  | 0.017 |
| Blautia                  | Ethanolamine           | -0.484 | 0.001  | 0.019 |
| f__Lachnospiraceae       | Ethanolamine           | -0.460 | 0.002  | 0.028 |
| o__Clostridiales         | Galactitol             | -0.504 | <0.001 | 0.014 |
| SMB53                    | Galactitol             | -0.469 | 0.001  | 0.025 |
| o__Clostridiales         | Genistein              | 0.488  | 0.001  | 0.018 |
| f__Lachnospiraceae       | Glutamic Acid          | 0.451  | 0.002  | 0.031 |
| SMB53                    | Glutamine              | 0.424  | 0.004  | 0.044 |
| o__Clostridiales         | Glycine                | -0.457 | 0.002  | 0.029 |
| [Ruminococcus]           | Glycine                | -0.432 | 0.003  | 0.039 |
| SMB53                    | Glycine                | -0.423 | 0.004  | 0.044 |
| f__Erysipelotrichaceae   | Glycine                | -0.472 | 0.001  | 0.024 |
| Blautia                  | Glycine                | -0.576 | <0.001 | 0.003 |
| f__Lachnospiraceae       | Glycine                | -0.619 | <0.001 | 0.001 |
| Oscillospira             | Glycine                | -0.449 | 0.002  | 0.031 |
| Bifidobacterium          | Glycitein              | -0.461 | 0.002  | 0.028 |
| Coprococcus              | Indole-3-Acetic Acid   | 0.481  | 0.001  | 0.020 |
| f__Peptostreptococcaceae | Indole-3-Acetic Acid   | 0.486  | 0.001  | 0.018 |
| [Clostridium]            | Indole-3-Acetic Acid   | 0.629  | <0.001 | 0.001 |
| SMB53                    | Indole-3-Acetic Acid   | 0.447  | 0.002  | 0.033 |
| [Eubacterium]            | Indole-3-Acetic Acid   | 0.436  | 0.003  | 0.037 |
| f__Clostridiaceae        | Indole-3-Acetic Acid   | 0.455  | 0.002  | 0.030 |
| Oscillospira             | Indole-3-Acetic Acid   | 0.427  | 0.004  | 0.042 |
| o__Clostridiales         | Indole-3-Lactic Acid   | -0.450 | 0.002  | 0.031 |
| f__Peptostreptococcaceae | Indole-3-Lactic Acid   | -0.418 | 0.005  | 0.047 |
| SMB53                    | Indole-3-Lactic Acid   | -0.466 | 0.001  | 0.026 |
| Bifidobacterium          | Indole-3-Lactic Acid   | 0.487  | 0.001  | 0.018 |
| f__Lachnospiraceae       | Indole-3-Lactic Acid   | -0.466 | 0.001  | 0.026 |
| Oscillospira             | Indole-3-Lactic Acid   | -0.612 | <0.001 | 0.001 |
| Bifidobacterium          | Inosine                | -0.612 | <0.001 | 0.001 |

On-line Supplementary Material  
**Lauren Brink et al. Neonatal diet alters fecal microbiota and metabolome profiles over the first year of life in infants fed breast milk or formula.**

|                          |                         |        |        |       |
|--------------------------|-------------------------|--------|--------|-------|
| Coprococcus              | Isobutyric Acid         | 0.456  | 0.002  | 0.029 |
| f__Peptostreptococcaceae | Isobutyric Acid         | 0.459  | 0.002  | 0.028 |
| [Ruminococcus]           | Isobutyric Acid         | 0.458  | 0.002  | 0.028 |
| Roseburia                | Isobutyric Acid         | 0.457  | 0.002  | 0.029 |
| SMB53                    | Isobutyric Acid         | 0.424  | 0.004  | 0.044 |
| f__Ruminococcaceae       | Isobutyric Acid         | 0.422  | 0.004  | 0.045 |
| f__Erysipelotrichaceae   | Isobutyric Acid         | 0.569  | <0.001 | 0.004 |
| [Eubacterium]            | Isobutyric Acid         | 0.501  | 0.001  | 0.014 |
| Blautia                  | Isobutyric Acid         | 0.473  | 0.001  | 0.023 |
| f__Lachnospiraceae       | Isobutyric Acid         | 0.635  | <0.001 | 0.001 |
| Oscillospira             | Isobutyric Acid         | 0.558  | <0.001 | 0.005 |
| o__Clostridiales         | Isovaleric Acid         | 0.431  | 0.004  | 0.040 |
| Coprococcus              | Isovaleric Acid         | 0.432  | 0.003  | 0.039 |
| f__Peptostreptococcaceae | Isovaleric Acid         | 0.543  | <0.001 | 0.007 |
| [Ruminococcus]           | Isovaleric Acid         | 0.440  | 0.003  | 0.036 |
| Roseburia                | Isovaleric Acid         | 0.444  | 0.003  | 0.034 |
| SMB53                    | Isovaleric Acid         | 0.534  | <0.001 | 0.008 |
| f__Erysipelotrichaceae   | Isovaleric Acid         | 0.552  | <0.001 | 0.005 |
| [Eubacterium]            | Isovaleric Acid         | 0.553  | <0.001 | 0.005 |
| Blautia                  | Isovaleric Acid         | 0.449  | 0.002  | 0.032 |
| f__Lachnospiraceae       | Isovaleric Acid         | 0.649  | <0.001 | 0.001 |
| Oscillospira             | Isovaleric Acid         | 0.609  | <0.001 | 0.001 |
| Bifidobacterium          | Jasmonic acid           | -0.447 | 0.002  | 0.033 |
| Coprococcus              | Kynurenic Acid          | -0.420 | 0.005  | 0.046 |
| Roseburia                | L-Carnitine             | -0.425 | 0.004  | 0.044 |
| Blautia                  | L-Carnitine             | -0.460 | 0.002  | 0.028 |
| o__Clostridiales         | Myo-Inositol            | -0.431 | 0.004  | 0.040 |
| f__Erysipelotrichaceae   | Myo-Inositol            | -0.446 | 0.002  | 0.033 |
| f__Lachnospiraceae       | Myo-Inositol            | -0.570 | <0.001 | 0.004 |
| Oscillospira             | Myo-Inositol            | -0.520 | <0.001 | 0.010 |
| Coprococcus              | N-Acetylneuraminic Acid | -0.538 | <0.001 | 0.007 |
| f__Erysipelotrichaceae   | N-Acetylneuraminic Acid | -0.504 | <0.001 | 0.014 |
| f__Lachnospiraceae       | N-Acetylneuraminic Acid | -0.504 | <0.001 | 0.014 |
| Oscillospira             | N-Acetylneuraminic Acid | -0.488 | 0.001  | 0.018 |
| o__Clostridiales         | N-Cinnamylglycine       | -0.445 | 0.002  | 0.033 |
| Blautia                  | N-Cinnamylglycine       | -0.451 | 0.002  | 0.031 |
| f__Lachnospiraceae       | N-Cinnamylglycine       | -0.454 | 0.002  | 0.030 |
| Oscillospira             | N-Cinnamylglycine       | -0.579 | <0.001 | 0.003 |
| Oscillospira             | N1,N12-Diacetylspermine | -0.421 | 0.004  | 0.045 |
| o__Clostridiales         | Neopterin               | -0.438 | 0.003  | 0.036 |
| f__Erysipelotrichaceae   | Neopterin               | -0.501 | 0.001  | 0.015 |

On-line Supplementary Material  
**Lauren Brink et al. Neonatal diet alters fecal microbiota and metabolome profiles over the first year of life in infants fed breast milk or formula.**

|                          |                    |        |        |       |
|--------------------------|--------------------|--------|--------|-------|
| Blautia                  | Neopterin          | -0.485 | 0.001  | 0.018 |
| f__Lachnospiraceae       | Neopterin          | -0.505 | <0.001 | 0.014 |
| Oscillospira             | Neopterin          | -0.473 | 0.001  | 0.023 |
| f__Lachnospiraceae       | Palmitoylcarnitine | -0.469 | 0.001  | 0.025 |
| Oscillospira             | Palmitoylcarnitine | -0.626 | <0.001 | 0.001 |
| f__Peptostreptococcaceae | Phenylacetic Acid  | 0.565  | <0.001 | 0.004 |
| [Ruminococcus]           | Phenylacetic Acid  | 0.515  | <0.001 | 0.011 |
| Roseburia                | Phenylacetic Acid  | 0.423  | 0.004  | 0.045 |
| SMB53                    | Phenylacetic Acid  | 0.569  | <0.001 | 0.004 |
| f__Erysipelotrichaceae   | Phenylacetic Acid  | 0.458  | 0.002  | 0.029 |
| [Eubacterium]            | Phenylacetic Acid  | 0.571  | <0.001 | 0.004 |
| f__Clostridiaceae        | Phenylacetic Acid  | 0.457  | 0.002  | 0.029 |
| f__Lachnospiraceae       | Phenylacetic Acid  | 0.633  | <0.001 | 0.001 |
| Oscillospira             | Phenylacetic Acid  | 0.645  | <0.001 | 0.001 |
| o__Clostridiales         | Proline            | -0.437 | 0.003  | 0.037 |
| Coprococcus              | Proline            | -0.494 | 0.001  | 0.016 |
| f__Peptostreptococcaceae | Proline            | -0.494 | 0.001  | 0.016 |
| Bacteroides              | Proline            | 0.420  | 0.005  | 0.046 |
| [Clostridium]            | Proline            | -0.421 | 0.004  | 0.045 |
| SMB53                    | Proline            | -0.514 | <0.001 | 0.011 |
| f__Ruminococcaceae       | Proline            | -0.551 | <0.001 | 0.005 |
| f__Erysipelotrichaceae   | Proline            | -0.428 | 0.004  | 0.042 |
| f__Clostridiaceae        | Proline            | -0.472 | 0.001  | 0.024 |
| Oscillospira             | Proline            | -0.472 | 0.001  | 0.024 |
| Bacteroides              | Propionic Acid     | 0.438  | 0.003  | 0.037 |
| [Eubacterium]            | Propionic Acid     | 0.486  | 0.001  | 0.018 |
| f__Lachnospiraceae       | Propionic Acid     | 0.422  | 0.004  | 0.045 |
| Oscillospira             | Propionic Acid     | 0.441  | 0.003  | 0.035 |
| o__Clostridiales         | sarcosine          | -0.518 | <0.001 | 0.011 |
| Coprococcus              | sarcosine          | -0.522 | <0.001 | 0.010 |
| f__Peptostreptococcaceae | sarcosine          | -0.531 | <0.001 | 0.008 |
| Roseburia                | sarcosine          | -0.451 | 0.002  | 0.031 |
| SMB53                    | sarcosine          | -0.535 | <0.001 | 0.008 |
| f__Ruminococcaceae       | sarcosine          | -0.494 | 0.001  | 0.016 |
| f__Erysipelotrichaceae   | sarcosine          | -0.484 | 0.001  | 0.019 |
| f__Clostridiaceae        | sarcosine          | -0.438 | 0.003  | 0.036 |
| Blautia                  | sarcosine          | -0.540 | <0.001 | 0.007 |
| f__Lachnospiraceae       | sarcosine          | -0.517 | <0.001 | 0.011 |
| Oscillospira             | sarcosine          | -0.484 | 0.001  | 0.019 |
| o__Clostridiales         | Sebacic Acid       | 0.419  | 0.005  | 0.046 |
| f__Peptostreptococcaceae | Sebacic Acid       | 0.577  | <0.001 | 0.003 |



On-line Supplementary Material

**Lauren Brink et al. Neonatal diet alters fecal microbiota and metabolome profiles over the first year of life in infants fed breast milk or formula.**

|                          |                                     |             |          |            |
|--------------------------|-------------------------------------|-------------|----------|------------|
| SMB53                    | Sebacic Acid                        | 0.554       | <0.001   | 0.005      |
| Oscillospira             | Sebacic Acid                        | 0.418       | 0.005    | 0.048      |
| Bifidobacterium          | Syringic Acid                       | -0.427      | 0.004    | 0.042      |
| Oscillospira             | Syringic Acid                       | 0.464       | 0.001    | 0.027      |
| o__Clostridiales         | Trigonelline                        | -0.448      | 0.002    | 0.032      |
| Coprococcus              | Trigonelline                        | -0.468      | 0.001    | 0.025      |
| Roseburia                | Trigonelline                        | -0.454      | 0.002    | 0.030      |
| f__Erysipelotrichaceae   | Trigonelline                        | -0.491      | 0.001    | 0.017      |
| Blautia                  | Trigonelline                        | -0.501      | 0.001    | 0.014      |
| f__Lachnospiraceae       | Trigonelline                        | -0.558      | <0.001   | 0.005      |
| Oscillospira             | Trigonelline                        | -0.422      | 0.004    | 0.045      |
| f__Peptostreptococcaceae | Tyrosine                            | 0.508       | <0.001   | 0.013      |
| SMB53                    | Tyrosine                            | 0.458       | 0.002    | 0.028      |
| [Ruminococcus]           | Uric Acid                           | -0.459      | 0.002    | 0.028      |
| f__Erysipelotrichaceae   | Uric Acid                           | -0.452      | 0.002    | 0.031      |
| f__Lachnospiraceae       | Uric Acid                           | -0.451      | 0.002    | 0.031      |
| Oscillospira             | Uric Acid                           | -0.467      | 0.001    | 0.026      |
| [Ruminococcus]           | Urobilin                            | 0.607       | <0.001   | 0.001      |
| f__Erysipelotrichaceae   | Urobilin                            | 0.514       | <0.001   | 0.011      |
| f__Lachnospiraceae       | Urobilin                            | 0.471       | 0.001    | 0.024      |
| Oscillospira             | Urobilin                            | 0.588       | <0.001   | 0.002      |
| [Ruminococcus]           | Urobilinogen                        | 0.529       | <0.001   | 0.009      |
| f__Erysipelotrichaceae   | Urobilinogen                        | 0.601       | <0.001   | 0.002      |
| f__Lachnospiraceae       | Urobilinogen                        | 0.427       | 0.004    | 0.042      |
| Oscillospira             | Urobilinogen                        | 0.516       | <0.001   | 0.011      |
| [Eubacterium]            | Valeric Acid                        | 0.550       | <0.001   | 0.005      |
| f__Lachnospiraceae       | Valeric Acid                        | 0.462       | 0.002    | 0.028      |
| Oscillospira             | Valeric Acid                        | 0.437       | 0.003    | 0.037      |
| f__Ruminococcaceae       | Valine                              | -0.523      | <0.001   | 0.010      |
| <b>9-Months</b>          |                                     |             |          |            |
| <b>Genus</b>             | <b>Metabolite</b>                   | <b>Coef</b> | <b>P</b> | <b>FDR</b> |
| [Ruminococcus]           | Hexadecanoic acid                   | -0.684      | <0.001   | 0.037      |
| f__Lachnospiraceae       | Hexadecanoic acid                   | -0.678      | <0.001   | 0.037      |
| f__Lachnospiraceae       | L-Saccharophine                     | -0.783      | <0.001   | 0.001      |
| <b>12-Months</b>         |                                     |             |          |            |
| <b>Genus</b>             | <b>Metabolite</b>                   | <b>Coef</b> | <b>P</b> | <b>FDR</b> |
| f__Peptostreptococcaceae | Hydroxyphenyllactic Acid            | -0.540      | <0.001   | 0.033      |
| f__Lachnospiraceae       | Hydroxyphenyllactic Acid            | -0.554      | <0.001   | 0.030      |
| f__Peptostreptococcaceae | Methyl- $\alpha$ -D-Glucopyranoside | -0.657      | <0.001   | 0.001      |

On-line Supplementary Material  
**Lauren Brink et al. Neonatal diet alters fecal microbiota and metabolome profiles over the first year of life in infants fed breast milk or formula.**

|                          |                                               |        |        |        |
|--------------------------|-----------------------------------------------|--------|--------|--------|
| SMB53                    | Methyl- $\alpha$ -D-Glucopyranoside           | -0.545 | <0.001 | 0.033  |
| f__Peptostreptococcaceae | cis-11,12-Methylene<br>Pentadecanoylcarnitine | -0.554 | <0.001 | 0.030  |
| Bacteroides              | Lysine                                        | -0.682 | <0.001 | <0.001 |

<sup>1</sup>Genera counts were transformed using a centered-log ratio transformation prior to correlation. Zeros were imputed using the geometric Bayesian multiplicative method. Metabolomics data were log transformed. False discovery rate correction was used to adjust P-values for multiple comparisons. Abbreviations: Coef: Pearson's r coefficient; FDR: False discovery rate.
